# Supplementary material for: Sustainable electrocatalytic oxidation of N-alkylamides to acyclic imides using H2O
Source: Royal Society of Chemistry journal article supplement (doi:10.1039/d3gc04010k), 2023-12-13

## Sustainable Electrocatalytic Oxidation of *N*-Alkylamides to Acyclic Imides Using H<sub>2</sub>O

Jing Qi<sup>†</sup>, Xiyang Wang<sup>†</sup>, Gan Wang<sup>†</sup>, Srinivas Reddy Dubbaka<sup>‡</sup>, Patrick O'Neill<sup>§</sup>, Hwee Ting Ang<sup>\*†</sup>, Jie Wu<sup>\*†</sup>

<sup>†</sup> Department of Chemistry, National University of Singapore, 3 Science Drive 3, Singapore 117543, Singapore.

<sup>‡</sup> Pfizer Asia Manufacturing Pte Ltd, Manufacturing Technology Development Centre (MTDC), Synapse Building, #05-17, 3 Biopolis Drive, Singapore, 138623

<sup>§</sup> Pfizer Ireland Pharmaceuticals, Process Development Centre, Ringaskiddy (PDC), Co-Cork, Ireland, 637578.

email: [hweeting@nus.edu.sg](mailto:hweeting@nus.edu.sg); [chmjie@nus.edu.sg](mailto:chmjie@nus.edu.sg)

|                                                                                                            |            |
|------------------------------------------------------------------------------------------------------------|------------|
| <b>1. General Information</b> .....                                                                        | <b>S2</b>  |
| <b>2. Synthesis of Amides</b> .....                                                                        | <b>S2</b>  |
| <b>3. Typical Procedure</b> .....                                                                          | <b>S3</b>  |
| <b>4. A gram scale reaction 1v</b> .....                                                                   | <b>S3</b>  |
| <b>5 Mechanistic study experiments</b> .....                                                               | <b>S4</b>  |
| 5.1 <sup>18</sup> O-Labeling Experiment .....                                                              | <b>S4</b>  |
| 5.2. <i>N</i> -(hydroxymethyl)benzamide(II) Intermediate Reacts Cleanly on the Anode to Form Product ..... | <b>S5</b>  |
| 5.3. The Cyclic Voltammetry of 1b .....                                                                    | <b>S5</b>  |
| <b>6. Application:</b>                                                                                     |            |
| 6.1. Synthesis of 1 <i>H</i> -1, 2, 4-triazole .....                                                       | <b>S5</b>  |
| 6.2 Large scale in the circulated flow synthesis .....                                                     | <b>S6</b>  |
| <b>7. Unsuccessful Substrates</b> .....                                                                    | <b>S6</b>  |
| <b>8. Analytical Data of Isolate Compounds</b> .....                                                       | <b>S6</b>  |
| <b>9. References</b> .....                                                                                 | <b>S26</b> |
| <b>10. NMR Spectrum of prepared compounds</b> .....                                                        | <b>S27</b> |

## 1. General Information

Unless otherwise noted, all chemicals were purchased from commercial suppliers (Sigma Aldrich, TCI, Oakwood) and used without further purification. When required, solvents were dried according to general purification methods. The product mixtures were analyzed by thin layer chromatography using TLC silica gel plates (MerckSchuchardt) with fluorescent indicator ( $\lambda = 254$  nm). The purification of the products was performed by flash column chromatography using silica gel 60 (63-200  $\mu\text{m}$ ) from SANPONT.  $^1\text{H}$  NMR,  $^{13}\text{C}$  NMR and  $^{19}\text{F}$  NMR spectra were recorded on a Bruker AV-III400 (400 MHz) or AMX500 (500 MHz) spectrometer. Chemical shifts were calibrated using residual undeuterated solvent as an internal reference ( $\text{CDCl}_3$ : 7.26 ppm  $^1\text{H}$  NMR, 77.00 ppm  $^{13}\text{C}$  NMR). Multiplicity was indicated as follows: s (singlet), d (doublet), t (triplet), q (quartet), m (multiplet), dd (doublet of doublet), td (triplet of doublets), dt (doublet of triplets), ddd (doublet of doublets of doublets), brs (broad singlet). All high-resolution mass spectra (HRMS) were obtained on a Finnigan/MAT 95XL-T spectrometer. Cyclic voltammetry was performed using an Ametek Versa STAT 3. Absorption spectra were recorded in 1 cm path quartz cuvettes using an Edinburgh FS-5 spectrofluorometer. Continuous wave X-band ESR spectra were obtained with a JEOL (FA200) spectrometer.

## 2. Synthesis of Amides

2.1. Amides **1a**, **1b**, **1c**, **1d**, **1e**, **1f**, **1g**, **1h**, **1i**, **1j**, **1k**, **1l**, **1m**, **1n**, **1p**, **1s**, **1x**, **1y**, **1aa**, **1ab**, **1ag**, **1ai**, **1ak**, **1al**. were known compounds and prepared according to the literature procedures.

Other Amides used in this work were prepared by the following two procedures:

### 2.2. General procedure A:

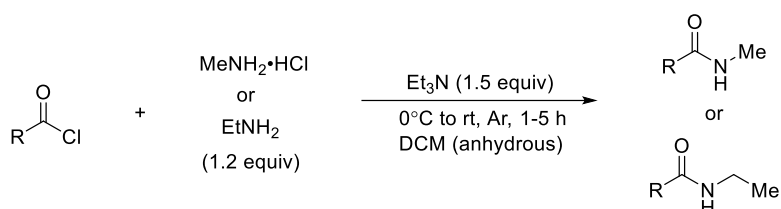

To an ice solution of amine (1.2 equiv) and triethylamine (1.5 equiv) in DCM (anhydrous) (0.25 M). Acyl chloride (1.0 equiv) was added dropwise. The reaction mixture was proceed until TLC indicating reaction complete. The reaction was then quenched with  $\text{H}_2\text{O}$  and extracted with ethyl acetate. The combined organic layers were washed with brine, dried over  $\text{Na}_2\text{SO}_4$ , and concentrated. The crude residue was purified by flash column chromatography to give the desired amides.

### 2.3. General procedure B:

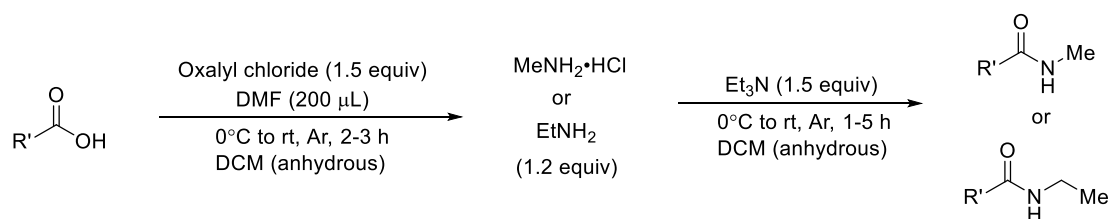

To an ice solution of acid (1.0 equiv) and DMF (catalytic) in DCM (anhydrous) (0.25 M), Oxalyl chloride (1.0 equiv) was added dropwise, keep the reaction stirred under 0°C about 30 min, then remove the ice bath. The resulting solution was stirred at room temperature for 2 h. The solvent was evaporated under reduced pressure to afford acyl chloride, which was directly used for the next step without further purification.

Subsequently, an ice solution of amine (1.2 equiv) and triethylamine (1.5 equiv) in DCM (anhydrous) (0.25 M). Acyl chloride (1.0 equiv) was added dropwise. The reaction mixture was proceeded until TLC indicating reaction complete. The reaction was then quenched with H<sub>2</sub>O and extracted with ethyl acetate. The combined organic layers were washed with brine, dried over Na<sub>2</sub>SO<sub>4</sub>, and concentrated. The crude residue was purified by flash column chromatography to give the desired amides.

### 3. Typical procedure.

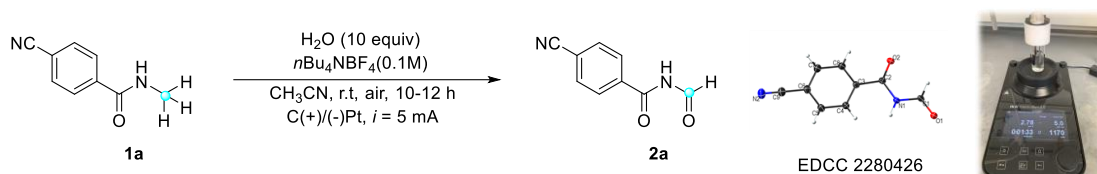

(using ElectroSyn 2.0). The ElectroSyn vial (10 mL volume) was charged with a magnetic stir bar, amide (0.2 mmol, 1.0 equiv.) and H<sub>2</sub>O (36  $\mu$ L, 10 equiv.) *n*Bu<sub>4</sub>NBF<sub>4</sub> (0.5 mmol), CH<sub>3</sub>CN (5 mL) (Liquid substrate was added after solvent). The graphite plate anode and Pt plate cathode were adapted on the ElectroSyn vial cap and the vial cap was screwed onto the vial tightly. The vial was adapted onto the vial holder of ElectroSyn 2.0. Parameters were set: “new experiment” at constant current to 5.0 mA, selecting “No” for “use of reference electrode” and adjusting the reaction time “10-12 h” The reaction mixture was quenched by removing from the electricity. Upon completion, the reaction mixture was concentrated under reduced pressure. The residue was purified by flash column chromatography on silica gel (1:20 ethyl acetate/petroleum ether) to afford **2a**

### 4. A gram scale reaction 1v

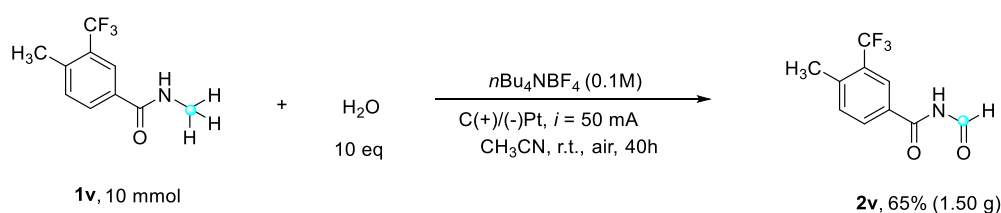

The gram scale reaction was conducted in a 100 mL beaker-type cell equipped with a graphite plate anode (6 cm x 4 cm x 0.4 cm) and a platinum plate (5 cm x 5 cm x 0.1 cm) cathode. The two electrodes were placed in parallel. The cell was charged with a magnetic stir bar, *N*, 4-dimethyl-3-(trifluoromethyl)benzamide (2.17 gram, 10 mmol.), H<sub>2</sub>O (1.8 mL, 10 equiv.), and *n*Bu<sub>4</sub>NBF<sub>4</sub> (5 mmol) and CH<sub>3</sub>CN (50 mL) (Liquid substrate was added after solvent). The reaction was carried out at room temperature using a constant current of 50 mA for 40 h (under atmosphere). The reaction mixture was quenched by removing from the electricity. Upon completion, the reaction mixture was concentrated under reduced pressure. The residue was purified by flash column chromatography on silica gel (1:20 ethyl acetate/petroleum ether) to afford **2v** a white solid (1.50g, 65% yield)

## 5 Mechanistic study experiments

### 5.1 <sup>18</sup>O-Labeling Experiment

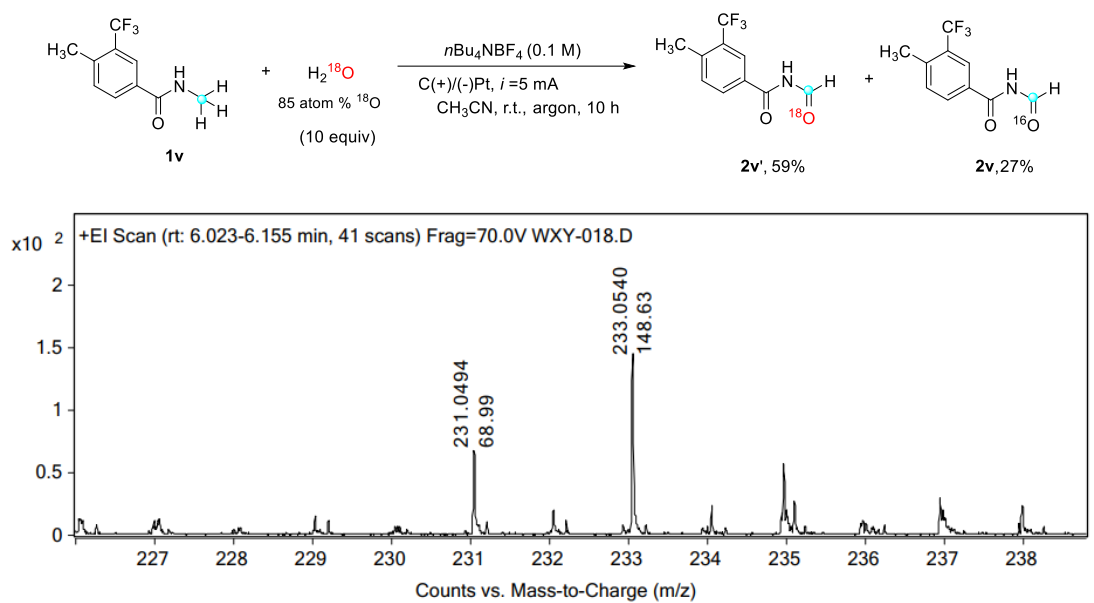

**Figure 1.** The HRMS determination of the proportion of <sup>18</sup>O

(using ElectraSyn 2.0). The ElectraSyn vial (10 mL volume) was charged with a magnetic stir bar, amide (0.2 mmol, 1.0 equiv.) and  $\text{H}_2^{18}\text{O}$  (36  $\mu\text{L}$ , 10 equiv, 85 atom % <sup>18</sup>O.)  $n\text{Bu}_4\text{NBF}_4$  (0.5 mmol),  $\text{CH}_3\text{CN}$  (5 mL) (Liquid substrate was added after solvent). The graphite plate anode and Pt plate cathode were adapted on the ElectraSyn vial cap and the vial cap was screwed onto the vial tightly. An argon filled balloon was adapted through the cap to bubble 3 minutes and then maintain an argon atmosphere. The vial was adapted onto the vial holder of ElectraSyn 2.0. Parameters were set: “new experiment” at constant current to 5.0 mA, selecting “No” for “use of reference electrode” and adjusting the reaction time “10 h” The reaction mixture was quenched by removing from the electricity. Checking the HRMS of the crude reaction mixture, got the **figure 1**. The reaction mixture was concentrated under reduced pressure, the residue was purified by flash column chromatography on silica gel (1:20 ethyl acetate/petroleum ether) to afford the white solid title compound (39.8 mg, 86%). <sup>1</sup>H NMR (400 MHz,  $\text{CDCl}_3$ )  $\delta$  9.18 (d,  $J = 8.0 \text{ Hz}$ , 1H), 8.83 (br, 1H), 2.56-2.48 (m, 1H), 2.03-1.98 (m, 2H), 1.78-1.71 (m, 1H), 1.14 (s, 3H), 1.11 (s, 3H), 0.98 (s, 3H). <sup>13</sup>C NMR (126 MHz,  $\text{CDCl}_3$ )  $\delta$  176.8, 168.5, 160.8, 91.18, 55.58, 55.0, 30.50, 28.8, 16.5, 16.5, 9.6.

### 5.2. *N*-(hydroxymethyl)benzamide(II) Intermediate Reacts Cleanly on the Anode to Form Product

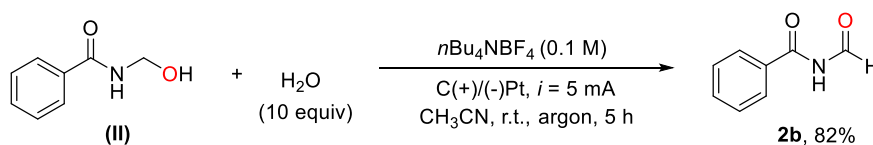

(using ElectraSyn 2.0). The ElectraSyn vial (10 mL volume) was charged with a magnetic stir bar, amide (0.2 mmol, 1.0 equiv.) and  $\text{H}_2\text{O}$  (36  $\mu\text{L}$ , 10 equiv.)  $n\text{Bu}_4\text{NBF}_4$  (0.5 mmol),  $\text{CH}_3\text{CN}$  (5 mL)

(Liquid substrate was added after solvent). The graphite plate anode and Pt plate cathode were adapted on the ElectraSyn vial cap and the vial cap was screwed onto the vial tightly. An argon filled balloon was adapted through the cap to bubble 3 minutes and then maintain an argon atmosphere. The vial was adapted onto the vial holder of ElectraSyn 2.0. Parameters were set: “new experiment” at constant current to 5.0 mA, selecting “No” for “use of reference electrode” and adjusting the reaction time “5 h” The reaction mixture was quenched by removing from the electricity. The reaction mixture was concentrated under reduced pressure, the residue was purified by flash column chromatography on silica gel (1:20 ethyl acetate/petroleum ether) to afford the white solid title compound (24.5 mg, 82%).

### 5.3. The Cyclic Voltammetry of **1b**

Cyclic voltammograms were collected using a VersaSTAT 3 Potentiostat Galvanostat from Princeton Applied Research. Samples were prepared with 0.15 mmol of substrate in 5 mL of 0.1 M tetra-*n*-butylammoniumhexafluorophosphate in dry acetonitrile. The samples were bubbled with argon for 10 min to avoid trace amount of O<sub>2</sub>. Measurements were conducted using glassy carbon working electrode, platinum wire counter electrode, and 3.5 M NaCl silver-silver chloride reference electrode in a scan rate of 0.1 V/s.

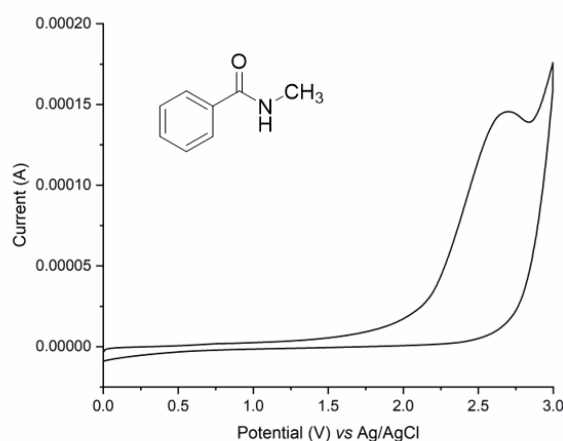

**Figure 2.** Cyclic voltammogram of **1b** (0.15 mmol) in an electrolyte of *n*Bu<sub>4</sub>NBF<sub>4</sub> (0.1 M) in MeCN (5.0 mL).  $E_{p/2} = 2.35$  V (vs Ag/AgCl)

## 6. Application:

### 6.1 Synthesis of 1*H*-1, 2, 4-triazole

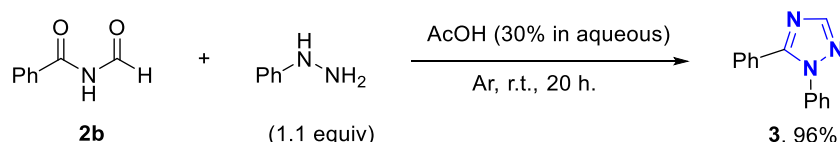

Two-necked round-bottom glass bottle was charged with a magnetic stir bar, *N*-formylbenzamide **2b** (0.2 mmol, 1.0 equiv.), phenylhydrazine (22  $\mu$ L, 1.1 equiv.) and 5 mL AcOH (30% in aqueous) (Liquid substrate was added after solvent). An argon filled balloon was adapted through the cap to bubble 3 minutes and then maintain an argon atmosphere. The reaction mixture was proceed until

TLC indicating reaction complete. The reaction was then quenched with H<sub>2</sub>O and extracted with ethyl acetate. The combined organic layers were washed with brine, dried over Na<sub>2</sub>SO<sub>4</sub>, and concentrated under reduced pressure, the residue was purified by flash column chromatography on silica gel to afford the title compound **3** (42.5 mg, 96%). <sup>1</sup>H NMR (400 MHz, CDCl<sub>3</sub>) δ 7.33-7.39 (m, 5H), 7.43-7.44 (m, 3H), 7.49-7.51 (m, 2H), 8.12 (s, 1H). <sup>13</sup>C NMR (126 MHz, CDCl<sub>3</sub>) δ 125.4, 127.4, 128.6, 128.9, 129.0, 129.4, 130.2, 138.1, 151.2, 153.7

## 6.2 Large scale in the circulated flow synthesis (preliminary result)

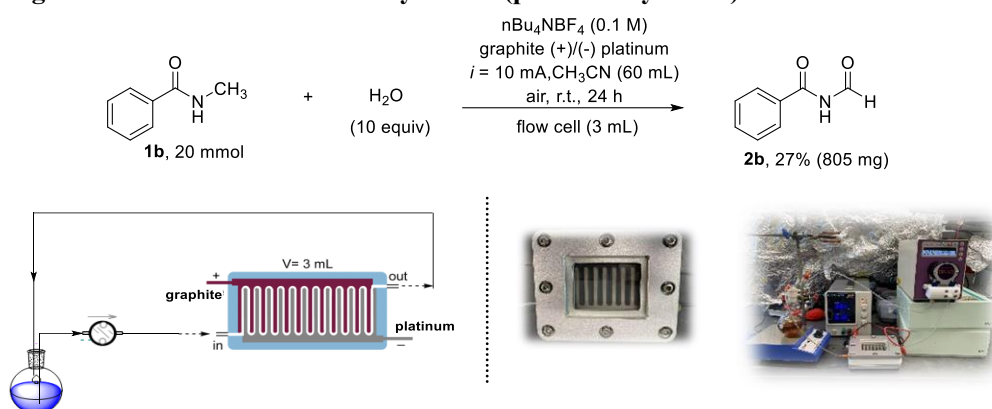

First, assembled and installed the flow electrochemistry device, the anode as graphite electrode, cathode as platinum electrode and the cell volume was 3 mL. Second, **1b** (20 mmol), H<sub>2</sub>O (10 equiv), n-Bu<sub>4</sub>NBF<sub>4</sub> (0.1 M) were dissolved in CH<sub>3</sub>CN (60 mL). The reaction mixture was pumped into the flow cell and electrolyzed at a constant current of 10 mA at room temperature. The flow rate was 10 mL/min and working 24 h. Evaporate the reaction mixture, purified by flash column chromatography, got the **2b** (805mg) in 27% yield.

## 7. Unsuccessful Substrates

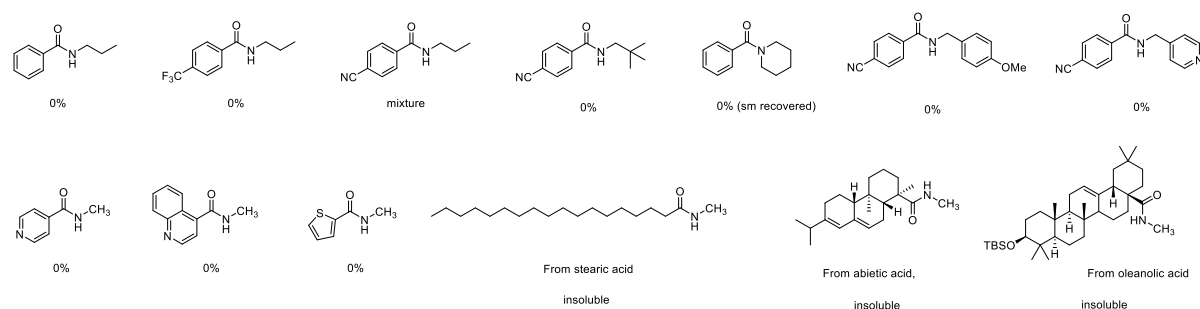

## 8. Analytical Data of Isolated Compounds

### 8.1. Analytical Data of Substrates

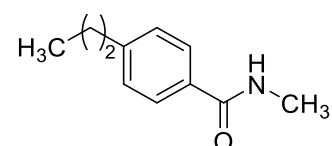

#### 4-ethyl-N-methylbenzamide (**1o**)

Following the general procedure A to afford product **1o** (797mg, 90 %) as white solid.

$^1\text{H}$  NMR (400 MHz,  $\text{CDCl}_3$ )  $\delta$  7.69 (d,  $J = 8.0$  Hz, 2H), 7.14 (d,  $J = 8.0$  Hz, 2H), 6.93 (br, 1H), 2.92 (d,  $J = 8.0$  Hz, 3H), 2.57 (d,  $J = 8.0$  Hz, 2H), 1.65-1.55 (m, 2H), 0.90 (t,  $J = 8.0$  Hz, 3H).  $^{13}\text{C}$  NMR (126 MHz,  $\text{CDCl}_3$ )  $\delta$  168.3, 146.1, 131.9, 128.3, 126.8, 37.7, 26.6, 24.1, 13.6. APCI HRMS: Found:  $m/z$  176.1086. Calcd for  $\text{C}_{11}\text{H}_{14}\text{NO}$ : ( $\text{M}^+$ ) 176.1081. APCI HRMS: Found:  $m/z$  176.1086. Calcd for  $\text{C}_{11}\text{H}_{14}\text{NO}$ : ( $\text{M}^+$ ) 176.1081.

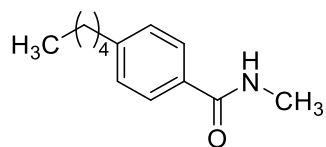

#### 4-ethyl-N-methylbenzamide (1q)

Following the general procedure A to afford product **1q** (974 mg, 95%) as white solid.

$^1\text{H}$  NMR (400 MHz,  $\text{CDCl}_3$ )  $\delta$  7.67 (d,  $J = 8.0$  Hz, 2H), 7.19 (d,  $J = 8.0$  Hz, 2H), 6.47 (br, 1H), 2.97 (d,  $J = 4.0$  Hz, 3H), 2.61 (t,  $J = 8.0$  Hz, 2H), 1.63-1.56 (m, 2H), 1.34-1.26 (m, 4H), 0.87 (t,  $J = 8.0$  Hz, 3H).  $^{13}\text{C}$  NMR (126 MHz,  $\text{CDCl}_3$ )  $\delta$  168.3, 146.6, 131.9, 128.5, 126.8, 35.7, 31.3, 30.8, 26.7, 22.4, 13.9. APCI HRMS: Found:  $m/z$  204.1402. Calcd for  $\text{C}_{13}\text{H}_{18}\text{NO}$ : ( $\text{M}^+$ ) 204.1394.

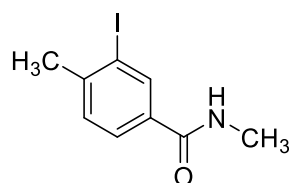

#### 3-iodo-N,4-dimethylbenzamide (1r)

Following the general procedure A to afford product **1r** (1200mg, 88%) as white solid.

$^1\text{H}$  NMR (400 MHz,  $\text{CDCl}_3$ )  $\delta$  8.18 (d, 1H), 7.62 (dd,  $J = 4.0, 8.0$  Hz, 1H), 7.23 (d,  $J = 8.0$  Hz, 1H), 6.53 (br, 1H), 2.97 (d,  $J = 4.0$  Hz, 3H), 2.43 (s, 3H).  $^{13}\text{C}$  NMR (126 MHz,  $\text{CDCl}_3$ )  $\delta$  166.6, 144.9, 137.4, 133.7, 129.57, 126.67, 100.87, 28.1, 26.8. APCI HRMS: Found:  $m/z$  xx. Calcd for  $\text{C}_9\text{H}_{10}\text{INO}$ : ( $\text{M}^+$ ) 274.9807.

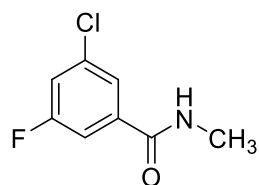

#### 3-chloro-5-fluoro-N-methylbenzamide (1t)

Following the general procedure A to afford product **1t** (851mg, 91%) as white solid.

$^1\text{H}$  NMR (400 MHz,  $\text{CDCl}_3$ )  $\delta$  7.60-7.56 (m, 1H), 7.08 (dd,  $J = 4.0, 12.0$  Hz, 1H), 6.97 (dt,  $J = 4.0, 8.0$  Hz, 1H), 6.52 (br, 1H), 2.95 (d,  $J = 4.0$  Hz, 3H).  $^{19}\text{F}$  NMR (276 MHz,  $\text{CDCl}_3$ )  $\delta$  -108.09-(108.11) (m, 1F).  $^{13}\text{C}$  NMR (126 MHz,  $\text{CDCl}_3$ )  $\delta$  166.3, 163.0 (d,  $J = 253.7$  Hz), 131.8 (d,  $J = 10.2$  Hz), 131.7 (d,  $J = 9.2$  Hz), 131.3 (d,  $J = 3.4$  Hz), 117.4 (d,  $J = 24.9$  Hz), 114.3 (d,  $J = 21.1$  Hz), 26.7. EI HRMS: Found:  $m/z$  186.0114. Calcd for  $\text{C}_8\text{H}_6\text{ClFNO}$ : ( $\text{M}^+$ ) 186.0116.

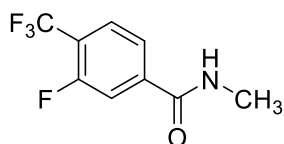

### 3-fluoro-N-methyl-4-(trifluoromethyl)benzamide (1u)

Following the general procedure A to afford product **1u** (840mg, 80 %) as white solid.

$^1\text{H}$  NMR (400 MHz,  $\text{CDCl}_3$ )  $\delta$  8.04 (dd,  $J = 4.0, 8.0$  Hz, 1H), 8.01-7.97 (m, 1H), 7.20 (t,  $J = 8.0$  Hz, 1H), 7.09 (br, 1H), 2.97 (d,  $J = 4.0$  Hz, 3H).  $^{19}\text{F}$  NMR (276 MHz,  $\text{CDCl}_3$ )  $\delta$  -61.68 (d,  $J = 8.3$  Hz, 3F), -109.95-(-110.06) (m, 1F).  $^{13}\text{C}$  NMR (126 MHz,  $\text{CDCl}_3$ )  $\delta$  26.9, 117.1 (q,  $J = 20.9$  Hz), 122.1 (d,  $J = 272.6$  Hz), 126.4, 130.9 (d,  $J = 3.4$  Hz), 133.41 – 132.61 (m), 160.3, 162.4 (s), 166.1. EI HRMS: Found:  $m/z$  220.0379. Calcd for  $\text{C}_9\text{H}_6\text{F}_4\text{NO}$ : ( $\text{M}^+$ ) 220.038.

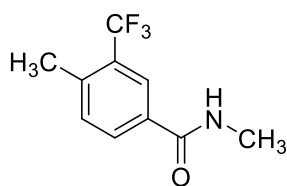

### N, 4-dimethyl-3-(trifluoromethyl)benzamide (1v)

Following the general procedure B to afford product **1v** (890mg, 82%) as white solid.

$^1\text{H}$  NMR (400 MHz,  $\text{CDCl}_3$ )  $\delta$  7.99 (br, 1H), 7.80 (dd,  $J = 4.0, 8.0$  Hz, 1H), 7.27 (d,  $J = 8.0$ , 1H), 6.93 (br, 1H), 2.97 (d,  $J = 4.0$  Hz, 3H), 2.47 (q,  $J = 4.0$  Hz, 3H).  $^{19}\text{F}$  NMR (276 MHz,  $\text{CDCl}_3$ )  $\delta$  -61.94 (s, 3F)  $^{13}\text{C}$  NMR (126 MHz,  $\text{CDCl}_3$ )  $\delta$  167.1, 140.11, 132.3, 132.1, 123.0, 129.0 (q,  $J = 30.1$  Hz), 124.5 (q,  $J = 5.6$  Hz), 124.0 (q,  $J = 274.5$  Hz), 26.8, 19.3. APCI HRMS: Found:  $m/z$  216.0654. Calcd for  $\text{C}_{10}\text{H}_{10}\text{F}_3\text{NO}$ : ( $\text{M}^+$ ) 216.0642.

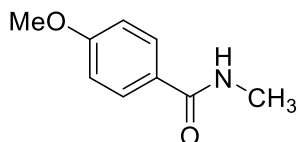

### 4-methoxy-N-methylbenzamide (1w)

Following the general procedure A to afford product **1w** (800mg, 97%) as yellowish solid.

$^1\text{H}$  NMR (400 MHz,  $\text{CDCl}_3$ )  $\delta$  7.74-7.71 (m, 2H), 6.91 -6.87 (m, 2H), 6.30 (br, 1H), 3.82 (s, 3H), 2.97 (d,  $J = 8.0$  Hz, 3H).  $^{13}\text{C}$  NMR (126 MHz,  $\text{CDCl}_3$ )  $\delta$  167.8, 162.0, 128.6, 126.9, 113.6, 55.3, 26.7. APCI HRMS: Found:  $m/z$  164.072. Calcd for  $\text{C}_9\text{H}_{10}\text{NO}_2$ : ( $\text{M}^+$ ) 164.0717.

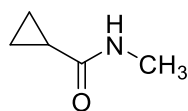

### N-methylcyclopropanecarboxamide (1z)

Following the general procedure A to afford product **1z** (475, 96%) as yellowish oil.

$^1\text{H}$  NMR (400 MHz,  $\text{CDCl}_3$ )  $\delta$  5.79 (br, 1H), 2.82 (d,  $J = 4.0$  Hz, 3H), 1.36-1.30 (m, 1H), 0.96-0.93 (m, 2H), 0.73-0.68 (m, 2H).  $^{13}\text{C}$  NMR (126 MHz,  $\text{CDCl}_3$ )  $\delta$  174.2, 26.5, 14.6, 6.9. APCI HRMS: Found:  $m/z$  98.0613. Calcd for  $\text{C}_5\text{H}_8\text{NO}$ : ( $\text{M}^+$ ) 98.0611.



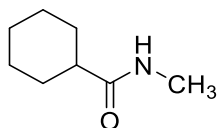

**N-methylcyclohexanecarboxamide (1ac)**

Following the general procedure A to afford product **1ac** (691mg, 98%) as white solid

<sup>1</sup>H NMR (400 MHz, CDCl<sub>3</sub>) δ 5.87 (br, 1H), 2.80 (d, *J* = 4.0 Hz, 3H), 2.13-2.06 (m, 2H), 1.89-1.82 (m, 2H), 1.81-1.75 (m, 2H), 1.70-1.64 (m, 1H), 1.48-1.38 (m, 2H), 1.31-1.21 (m, 2H). <sup>13</sup>C NMR (126 MHz, CDCl<sub>3</sub>) δ 176.8, 45.4, 29.6, 29.3, 26.1, 25.7. EI HRMS: Found: *m/z* 141.1146. Calcd for C<sub>8</sub>H<sub>15</sub>NO: (M<sup>+</sup>) 141.1148.

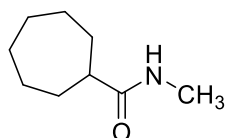

**N-methylcycloheptanecarboxamide (1ad)**

Following the general procedure A to afford product **1ad** (736mg, 95%) as white solid

<sup>1</sup>H NMR (400 MHz, CDCl<sub>3</sub>) δ 5.45 (br, 1H), 2.78 (d, *J* = 4.0 Hz, 3H), 2.24-2.17 (m, 1H), 1.90-1.83 (m, 2H), 1.79-1.73 (m, 2H), 1.69-1.60 (m, 2H), 1.58-1.50 (m, 4H), 1.48-1.39 (m, 2H). <sup>13</sup>C NMR (126 MHz, CDCl<sub>3</sub>) δ 177.9, 47.6, 31.7, 28.1, 26.6, 26.2. APCI HRMS: Found: *m/z* 155.1312. Calcd for C<sub>9</sub>H<sub>17</sub>NO: (M<sup>+</sup>) 155.1310.

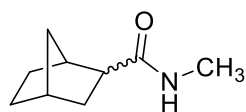

**(1S, 4R)-N-methylbicyclo[2.2.1]heptane-2-carboxamide (dr = 1:1.4) (1ae)**

Following the general procedure B to afford product **1ae** (627mg, 82%) as white solid

<sup>1</sup>H NMR (400 MHz, CDCl<sub>3</sub>) δ 5.6 (br, 2.4H), 2.81 (d, *J* = 4.0 Hz, 4.2H), 2.79 (d, *J* = 8.0 Hz, 3H), 2.65-2.59 (m, 1.4H), 2.42-2.36 (m, 2.4H), 2.31-2.25 (m, 2.4H), 2.11 (dd, *J* = 4.0, 8.0 Hz, 1H), 1.88-1.82 (m, 1H), 1.64-1.30 (m, 15.8H), 1.20-1.13 (m, 2.4H). <sup>13</sup>C NMR (126 MHz, CDCl<sub>3</sub>) δ 176.5, 174.7, 47.9, 47.1, 41.4, 40.9, 40.4, 37.0, 36.5, 35.9, 34.4, 31.5, 29.8, 29.2, 28.6, 26.3, 26.3, 24.3. APCI HRMS: Found: *m/z* 153.1153. Calcd for C<sub>9</sub>H<sub>15</sub>NO: (M<sup>+</sup>) 153.1154.

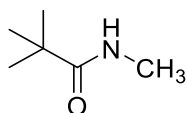

**N-methylpivalamide (1af)**

Following the general procedure B to afford product **1af** (518mg, 90%) as yellowish oil.

<sup>1</sup>H NMR (400 MHz, CDCl<sub>3</sub>) δ 5.70 (br, 1H), 2.79 (d, *J* = 8.0 Hz, 3H), 1.18 (s, 9H). <sup>13</sup>C NMR (126 MHz, CDCl<sub>3</sub>) δ 179.1, 29.7, 27.6, 26.5. EI HRMS: Found: *m/z* 115.0993. Calcd for C<sub>6</sub>H<sub>13</sub>NO: (M<sup>+</sup>) 115.0992.

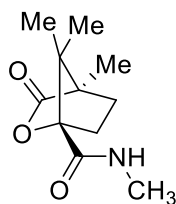

**(1S,4R)-N,4,7,7-tetramethyl-3-oxo-2-oxabicyclo[2.2.1]heptane-1-carboxamide (1ah)**

Following the general procedure B to afford product **1ah** (918mg, 87%) as white solid

$^1\text{H}$  NMR (400 MHz,  $\text{CDCl}_3$ )  $\delta$  6.45 (br, 1H), 2.87 (d,  $J = 8.0$  Hz, 3H), 2.57-2.49 (m, 1H), 1.97-1.85 (m, 2H), 1.71-1.65 (m, 1H), 1.11 (s, 3H), 1.10 (s, 3H), 0.89 (s, 3H).  $^{13}\text{C}$  NMR (126 MHz,  $\text{CDCl}_3$ )  $\delta$  178.2, 167.5, 92.7, 55.28 53.8, 30.3, 29.0, 25.7, 16.7, 16.5, 9.70. APCI HRMS: Found:  $m/z$  210.1144. Calcd for  $\text{C}_{11}\text{H}_{16}\text{NO}_3$ : ( $\text{M}^+$ ) 210.1136.

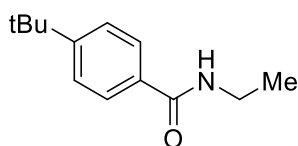

**4-(tert-butyl)-N-ethylbenzamide (1aj)**

Following the general procedure A to afford product **1aj** (953mg, 93%) as white solid

$^1\text{H}$  NMR (400 MHz,  $\text{CDCl}_3$ )  $\delta$  7.70 (dt,  $J = 4.0, 8.0$  Hz, 2H), 7.42 (dt,  $J = 4.0, 8.0$  Hz, 2H), 6.23 (br, 1H), 3.51-3.44 (m, 2H), 1.32 (s, 9H), 1.23 (t,  $J = 8.0$  Hz, 3H).  $^{13}\text{C}$  NMR (126 MHz,  $\text{CDCl}_3$ )  $\delta$  167.4, 154.7, 131.9, 126.6, 125.4, 34.8, 31.1, 14.9. APCI HRMS: Found:  $m/z$  205.1465.. Calcd for  $\text{C}_{13}\text{H}_{19}\text{NO}$ : ( $\text{M}^+$ ) 205.1467.

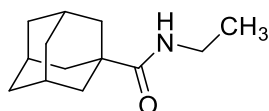

**(3r,5r,7r)-N-ethyladamantane-1-carboxamide (1am)**

Following the general procedure A to afford product **1am** (900mg, 87%) as white solid

$^1\text{H}$  NMR (400 MHz,  $\text{CDCl}_3$ )  $\delta$  5.65 (br, 1H), 3.25-3.18 (m, 2H), 1.98 (s, 3H), 1.80 (d,  $J = 4.0$  Hz, 6H), 1.70-1.62 (m, 6H), 1.07 (t,  $J = 8.0$  Hz, 3H).  $^{13}\text{C}$  NMR (126 MHz,  $\text{CDCl}_3$ )  $\delta$  177.7, 40.38, 39.1, 36.48, 34.08, 28.08, 14.8. APCI HRMS: Found:  $m/z$  207.1620. Calcd for  $\text{C}_{13}\text{H}_{21}\text{NO}$ : ( $\text{M}^+$ ) 207.1623.

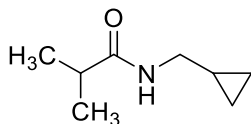

**N-(cyclopropylmethyl)isobutyramide (1an)**

Following the general procedure A to afford product **1an** (564mg, 80%) as white solid

$^1\text{H}$  NMR (400 MHz,  $\text{CDCl}_3$ )  $\delta$  5.59 (br, 1H), 3.20 (dd,  $J = 4.0, 8.0$  Hz, 2H), 2.39-2.29 (m, 1H), 1.16 (s, 3H), 1.14 (s, 3H), 0.98-0.88 (m, 1H), 0.51-0.47 (m, 2H), 0.19 (q,  $J = 8.0$  Hz, 2H).  $^{13}\text{C}$  NMR (126 MHz,  $\text{CDCl}_3$ )  $\delta$  176.8, 44.2, 35.7, 19.6, 10.7, 3.2.. APCI HRMS: Found:  $m/z$  xx. Calcd for xx.

**8.2. Analytical Data of product**

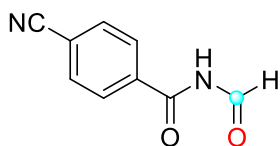

#### 4-cyano-N-formylbenzamide (2a)

Following the typical procedure, the title compound (25.5 mg, white solid) was obtained in 73% yield.  $^1\text{H}$  NMR (400 MHz,  $\text{CDCl}_3$ )  $\delta$  9.52 (br, 1H), 9.38 (d,  $J = 12.0$  Hz, 1H), 8.06 (dt,  $J = 8.0, 4.0$  Hz, 2H), 7.86 (dt,  $J = 12.0, 2.0$  Hz, 2H).  $^{13}\text{C}$  NMR (126 MHz,  $\text{CDCl}_3$ )  $\delta$  164.9, 163.5, 150.8, 132.9, 128.5, 128.0, 117.4. APCI HRMS: Found:  $m/z$  173.0354. Calcd for  $\text{C}_9\text{H}_5\text{N}_2\text{O}_2$ : ( $\text{M}^+$ ) 173.0357.

Table 1. Crystal data and structure refinement for M266.

|                                         |                                                                  |                              |
|-----------------------------------------|------------------------------------------------------------------|------------------------------|
| Identification code                     | M266                                                             |                              |
| Empirical formula                       | $\text{C}_9\text{H}_6\text{N}_2\text{O}_2$                       |                              |
| Formula weight                          | 174.16                                                           |                              |
| Temperature                             | 100(2) K                                                         |                              |
| Wavelength                              | 0.71073 Å                                                        |                              |
| Crystal system                          | Triclinic                                                        |                              |
| Space group                             | P-1                                                              |                              |
| Unit cell dimensions                    | $a = 3.7781(2)$ Å                                                | $\alpha = 94.101(2)^\circ$ . |
|                                         | $b = 7.5804(3)$ Å                                                | $\beta = 93.691(2)^\circ$ .  |
|                                         | $c = 14.7776(6)$ Å                                               | $\gamma = 96.948(2)^\circ$ . |
| Volume                                  | $417.90(3)$ Å <sup>3</sup>                                       |                              |
| Z                                       | 2                                                                |                              |
| Density (calculated)                    | 1.384 Mg/m <sup>3</sup>                                          |                              |
| Absorption coefficient                  | 0.101 mm <sup>-1</sup>                                           |                              |
| F(000)                                  | 180                                                              |                              |
| Crystal size                            | 0.188 x 0.117 x 0.099 mm <sup>3</sup>                            |                              |
| Theta range for data collection         | 3.723 to 29.553°.                                                |                              |
| Index ranges                            | $-5 \leq h \leq 5$ , $-10 \leq k \leq 10$ , $-17 \leq l \leq 20$ |                              |
| Reflections collected                   | 11723                                                            |                              |
| Independent reflections                 | 2329 [ $R(\text{int}) = 0.0421$ ]                                |                              |
| Completeness to $\theta = 25.242^\circ$ | 99.0 %                                                           |                              |
| Absorption correction                   | Semi-empirical from equivalents                                  |                              |
| Max. and min. transmission              | 0.7459 and 0.7132                                                |                              |
| Refinement method                       | Full-matrix least-squares on $F^2$                               |                              |
| Data / restraints / parameters          | 2329 / 0 / 122                                                   |                              |
| Goodness-of-fit on $F^2$                | 1.055                                                            |                              |
| Final R indices [ $I > 2\sigma(I)$ ]    | $R_1 = 0.0385$ , $wR_2 = 0.1091$                                 |                              |
| R indices (all data)                    | $R_1 = 0.0419$ , $wR_2 = 0.1135$                                 |                              |

|                             |                                    |
|-----------------------------|------------------------------------|
| Extinction coefficient      | n/a                                |
| Largest diff. peak and hole | 0.449 and -0.196 e.Å <sup>-3</sup> |

Table 2. Atomic coordinates ( $\times 10^4$ ) and equivalent isotropic displacement parameters ( $\text{\AA}^2 \times 10^3$ ) for M266.  $U(\text{eq})$  is defined as one third of the trace of the orthogonalized  $U^{ij}$  tensor.

|      | x       | y       | z       | U(eq) |
|------|---------|---------|---------|-------|
| O(1) | 2803(2) | 1104(1) | 5826(1) | 23(1) |
| O(2) | 2254(2) | 4745(1) | 4049(1) | 21(1) |
| N(1) | 3737(2) | 2062(1) | 4427(1) | 18(1) |
| N(2) | 9227(3) | 2226(1) | -452(1) | 31(1) |
| C(1) | 2489(2) | 2214(1) | 5278(1) | 18(1) |
| C(2) | 3462(2) | 3374(1) | 3828(1) | 16(1) |
| C(3) | 4721(2) | 3029(1) | 2901(1) | 17(1) |
| C(4) | 5226(2) | 1338(1) | 2536(1) | 20(1) |
| C(5) | 6372(2) | 1116(1) | 1665(1) | 21(1) |
| C(6) | 7013(2) | 2600(1) | 1166(1) | 21(1) |
| C(7) | 6509(3) | 4298(1) | 1525(1) | 24(1) |
| C(8) | 5354(2) | 4503(1) | 2393(1) | 21(1) |
| C(9) | 8238(3) | 2383(1) | 264(1)  | 24(1) |

Table 3. Bond lengths [Å] and angles [°] for M266.

|                 |            |
|-----------------|------------|
| O(1)-C(1)       | 1.2192(11) |
| O(2)-C(2)       | 1.2173(10) |
| N(1)-C(1)       | 1.3737(11) |
| N(1)-C(2)       | 1.3870(11) |
| N(1)-H(1)       | 0.892(15)  |
| N(2)-C(9)       | 1.1477(13) |
| C(1)-H(1A)      | 0.9500     |
| C(2)-C(3)       | 1.4934(12) |
| C(3)-C(4)       | 1.3941(12) |
| C(3)-C(8)       | 1.3963(12) |
| C(4)-C(5)       | 1.3900(12) |
| C(4)-H(4)       | 0.9500     |
| C(5)-C(6)       | 1.3939(13) |
| C(5)-H(5)       | 0.9500     |
| C(6)-C(7)       | 1.3966(13) |
| C(6)-C(9)       | 1.4438(12) |
| C(7)-C(8)       | 1.3853(12) |
| C(7)-H(7)       | 0.9500     |
| C(8)-H(8)       | 0.9500     |
|                 |            |
| C(1)-N(1)-C(2)  | 121.44(7)  |
| C(1)-N(1)-H(1)  | 116.9(9)   |
| C(2)-N(1)-H(1)  | 121.7(9)   |
| O(1)-C(1)-N(1)  | 122.48(8)  |
| O(1)-C(1)-H(1A) | 118.8      |
| N(1)-C(1)-H(1A) | 118.8      |
| O(2)-C(2)-N(1)  | 121.30(8)  |
| O(2)-C(2)-C(3)  | 121.67(8)  |
| N(1)-C(2)-C(3)  | 117.03(7)  |
| C(4)-C(3)-C(8)  | 120.14(8)  |
| C(4)-C(3)-C(2)  | 123.30(8)  |
| C(8)-C(3)-C(2)  | 116.56(8)  |
| C(5)-C(4)-C(3)  | 120.09(8)  |
| C(5)-C(4)-H(4)  | 120.0      |
| C(3)-C(4)-H(4)  | 120.0      |
| C(4)-C(5)-C(6)  | 119.21(8)  |

|                |            |
|----------------|------------|
| C(4)-C(5)-H(5) | 120.4      |
| C(6)-C(5)-H(5) | 120.4      |
| C(5)-C(6)-C(7) | 121.14(8)  |
| C(5)-C(6)-C(9) | 119.55(8)  |
| C(7)-C(6)-C(9) | 119.31(8)  |
| C(8)-C(7)-C(6) | 119.14(8)  |
| C(8)-C(7)-H(7) | 120.4      |
| C(6)-C(7)-H(7) | 120.4      |
| C(7)-C(8)-C(3) | 120.27(8)  |
| C(7)-C(8)-H(8) | 119.9      |
| C(3)-C(8)-H(8) | 119.9      |
| N(2)-C(9)-C(6) | 179.35(11) |

---

Symmetry transformations used to generate equivalent atoms:

Table 4. Anisotropic displacement parameters ( $\text{\AA}^2 \times 10^3$ ) for M266. The anisotropic displacement factor exponent takes the form:  $-2\pi^2 [ h^2 a^{*2} U^{11} + \dots + 2 h k a^* b^* U^{12} ]$

---

|      | $U^{11}$ | $U^{22}$ | $U^{33}$ | $U^{23}$ | $U^{13}$ | $U^{12}$ |
|------|----------|----------|----------|----------|----------|----------|
| O(1) | 31(1)    | 19(1)    | 21(1)    | 4(1)     | 8(1)     | 9(1)     |
| O(2) | 25(1)    | 18(1)    | 22(1)    | 1(1)     | 4(1)     | 9(1)     |
| N(1) | 21(1)    | 15(1)    | 19(1)    | 1(1)     | 5(1)     | 6(1)     |
| N(2) | 33(1)    | 34(1)    | 24(1)    | 1(1)     | 8(1)     | 1(1)     |
| C(1) | 18(1)    | 16(1)    | 19(1)    | 0(1)     | 4(1)     | 4(1)     |
| C(2) | 15(1)    | 16(1)    | 18(1)    | 0(1)     | 1(1)     | 2(1)     |
| C(3) | 15(1)    | 19(1)    | 17(1)    | 0(1)     | 2(1)     | 4(1)     |
| C(4) | 22(1)    | 19(1)    | 18(1)    | 1(1)     | 2(1)     | 4(1)     |
| C(5) | 22(1)    | 22(1)    | 19(1)    | -2(1)    | 2(1)     | 5(1)     |
| C(6) | 17(1)    | 27(1)    | 18(1)    | 1(1)     | 2(1)     | 2(1)     |
| C(7) | 26(1)    | 24(1)    | 22(1)    | 5(1)     | 5(1)     | 3(1)     |
| C(8) | 24(1)    | 19(1)    | 22(1)    | 2(1)     | 4(1)     | 4(1)     |
| C(9) | 23(1)    | 28(1)    | 22(1)    | 1(1)     | 3(1)     | 2(1)     |

---

Table 5. Hydrogen coordinates ( $\times 10^4$ ) and isotropic displacement parameters ( $\text{\AA}^2 \times 10^{-3}$ ) for M266.

|       | x        | y        | z        | U(eq) |
|-------|----------|----------|----------|-------|
| H(1)  | 4740(40) | 1080(20) | 4279(10) | 33(3) |
| H(1A) | 1339     | 3223     | 5447     | 21    |
| H(4)  | 4785     | 337      | 2882     | 23    |
| H(5)  | 6715     | -34      | 1412     | 25    |
| H(7)  | 6953     | 5300     | 1179     | 28    |
| H(8)  | 4991     | 5651     | 2643     | 26    |



Table 6. Torsion angles [°] for M266.

|                     |            |
|---------------------|------------|
| C(2)-N(1)-C(1)-O(1) | -177.69(8) |
| C(1)-N(1)-C(2)-O(2) | 3.43(13)   |
| C(1)-N(1)-C(2)-C(3) | -176.74(7) |
| O(2)-C(2)-C(3)-C(4) | -162.53(9) |
| N(1)-C(2)-C(3)-C(4) | 17.64(12)  |
| O(2)-C(2)-C(3)-C(8) | 16.66(12)  |
| N(1)-C(2)-C(3)-C(8) | -163.17(8) |
| C(8)-C(3)-C(4)-C(5) | 0.22(13)   |
| C(2)-C(3)-C(4)-C(5) | 179.38(8)  |
| C(3)-C(4)-C(5)-C(6) | 0.12(13)   |
| C(4)-C(5)-C(6)-C(7) | -0.25(14)  |
| C(4)-C(5)-C(6)-C(9) | 179.41(8)  |
| C(5)-C(6)-C(7)-C(8) | 0.04(14)   |
| C(9)-C(6)-C(7)-C(8) | -179.62(8) |
| C(6)-C(7)-C(8)-C(3) | 0.31(14)   |
| C(4)-C(3)-C(8)-C(7) | -0.44(14)  |
| C(2)-C(3)-C(8)-C(7) | -179.66(8) |

Symmetry transformations used to generate equivalent atoms:

Table 7. Hydrogen bonds for M266 [Å and °].

| D-H...A             | d(D-H)    | d(H...A)  | d(D...A)   | <(DHA)    |
|---------------------|-----------|-----------|------------|-----------|
| N(1)-H(1)...O(1)#1  | 0.892(15) | 1.998(15) | 2.8814(10) | 170.3(13) |
| C(1)-H(1A)...O(2)#2 | 0.95      | 2.29      | 3.2266(10) | 168.9     |

Symmetry transformations used to generate equivalent atoms:

#1 -x+1,-y,-z+1    #2 -x,-y+1,-z+1

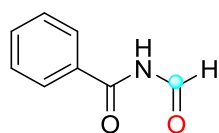

### **N-formylbenzamide (2b)**

This compound is a known compound that has been reported in a previous literature. Following the typical procedure, the title compound (22.4 mg, white solid) was obtained in 75% yield. <sup>1</sup>H NMR

(400 MHz, CDCl<sub>3</sub>)  $\delta$  9.36 (d,  $J$  = 12.0 Hz, 1H), 8.85 (br 1H) 7.90-7.87 (m, 2H), 7.68-7.64 (m, 1H). 7.57-7.52 (m, 2H). APCI HRMS: Found:  $m/z$  148.0406. Calcd for C<sub>8</sub>H<sub>6</sub>NO<sub>2</sub>: (M<sup>+</sup>) 148.0404<sup>1</sup>.

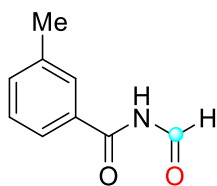

#### ***N*-formyl-4-methylbenzamide (2c)**

This compound is a known compound that has been reported in a previous literature. Following the typical procedure, the title compound (16.6 mg, white solid) was obtained in 51% yield. <sup>1</sup>H NMR (400 MHz, CDCl<sub>3</sub>)  $\delta$  9.36 (d,  $J$  = 8.0 Hz, 1H), 8.97 (br, 1H), 7.72 (br, 1H), 7.66 (d,  $J$  = 8.0 Hz, 1H), 7.46 (d,  $J$  = 8.0 Hz, 1H), 7.42 (t,  $J$  = 8.0 Hz, 1H), 2.44 (s, 3H). EI HRMS: Found:  $m/z$  163.0626. Calcd for C<sub>9</sub>H<sub>9</sub>NO<sub>2</sub>: (M<sup>+</sup>) 163.0628<sup>2</sup>.

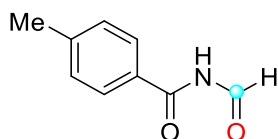

#### ***N*-formyl-3-methylbenzamide (2d)**

This compound is a known compound that has been reported in a previous literature. Following the typical procedure, the title compound (13.0 mg, white solid) was obtained in 40% yield. <sup>1</sup>H NMR (400 MHz, CDCl<sub>3</sub>)  $\delta$  9.36 (d,  $J$  = 12.0 Hz, 1H), 8.87(br, 1H) 7.78 (d,  $J$  = 8.0 Hz 2H), 7.34 (d,  $J$  = 8.0 Hz, 2H), 2.45 (s, 3H). APCI HRMS: Found:  $m/z$  162.0562. Calcd for C<sub>9</sub>H<sub>8</sub>NO<sub>2</sub>: (M<sup>+</sup>) 162.0561<sup>3</sup>.

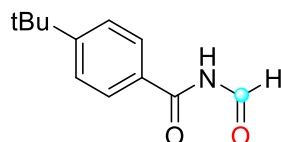

#### **4-(tert-butyl)-*N*-formylbenzamide (2e)**

Following the typical procedure, the title compound (30.4 mg, white solid) was obtained in 74% yield. <sup>1</sup>H NMR (400 MHz, CD<sub>3</sub>CN)  $\delta$  9.45 (br, 1H), 9.38 (d,  $J$  = 16.0 Hz, 1H), 7.88 (d,  $J$  = 8.0 Hz, 2H) 7.56 (d,  $J$  = 12.0 Hz, 2H), 1.35 (s, 9H). <sup>13</sup>C NMR (126 MHz, CDCl<sub>3</sub>)  $\delta$  166.4, 164.6, 157.9, 128.1, 128.0, 126.1, 35.2, 31.0. APCI HRMS: Found:  $m/z$  204.1029. Calcd for C<sub>12</sub>H<sub>14</sub>NO<sub>2</sub>: (M<sup>+</sup>) 204.103.

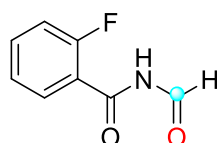

#### **2-fluoro-*N*-formylbenzamide (2f)**

This compound is a known compound that has been reported in a previous literature. Following the typical procedure, the title compound (27.1 mg, white solid) was obtained in 81% yield. <sup>1</sup>H NMR (400 MHz, CDCl<sub>3</sub>)  $\delta$  9.40 (dd,  $J$  = 4.0, 8.0 Hz, 1H), 9.06 (br, 1H), 8.14 (dt,  $J$  = 4.0, 8.0 Hz, 1H), 7.66-7.61 (m, 1H), 7.35 (dt,  $J$  = 4.0, 8.0 Hz, 1H), 7.22 (dd,  $J$  = 8.0, 12.0 Hz, 1H). <sup>19</sup>F NMR (376 MHz,

$\text{CDCl}_3$ )  $\delta$  -111.70(-111.59) (m, 1F). EI HRMS: Found:  $m/z$  167.0376. Calcd for  $\text{C}_8\text{H}_6\text{FNO}_2$ : ( $\text{M}^+$ ) 167.0377<sup>4</sup>.

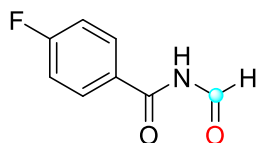

#### 4-fluoro-*N*-formylbenzamide (2g)

This compound is a known compound that has been reported in a previous literature. Following the typical procedure, the title compound (24.4 mg, white solid) was obtained in 73% yield.  $^1\text{H}$  NMR (400 MHz,  $\text{CDCl}_3$ )  $\delta$  9.77 (br 1H), 9.04 (d,  $J$  = 12.0 Hz, 1H), 8.04-7.99 (m, 2H), 7.26-7.20 (m, 2H).  $^{19}\text{F}$  NMR (376 MHz,  $\text{CDCl}_3$ )  $\delta$  -103.31(-103.24) (m, 1F). APCI HRMS: Found:  $m/z$  166.0315. Calcd for  $\text{C}_8\text{H}_5\text{FNO}_2$ : ( $\text{M}^+$ ) 166.031<sup>5</sup>.

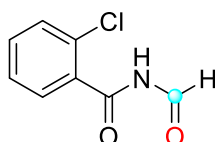

#### 2-chloro-*N*-formylbenzamide (2h)

This compound is a known compound that has been reported in a previous literature. Following the typical procedure, the title compound (27.9 mg, white solid) was obtained in 76% yield.

$^1\text{H}$  NMR (400 MHz,  $\text{CDCl}_3$ )  $\delta$  7.26 (d,  $J$  = 12.0 Hz, 1H) 8.90 (br, 1H), 7.35 (t,  $J$  = 8.0 Hz, 1H), 7.51-7.39 (m, 3H). EI HRMS: Found:  $m/z$  183.0078. Calcd for  $\text{C}_8\text{H}_6\text{ClNO}_2$ : ( $\text{M}^+$ ) 183.0082<sup>4</sup>.

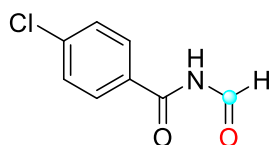

#### 4-chloro-*N*-formylbenzamide (2i)

This compound is a known compound that has been reported in a previous literature. Following the typical procedure, the title compound (30.8 mg, white solid) was obtained in 84% yield.  $^1\text{H}$  NMR (400 MHz,  $\text{CD}_3\text{CN}$ )  $\delta$  9.71 (d,  $J$  = 8.0 Hz, 1H), 9.37 (d,  $J$  = 8.0 Hz, 1H), 7.92 (dt,  $J$  = 4.0, 8.0 Hz, 2H), 7.53(dt,  $J$  = 4.0, 8.0 Hz, 2H). EI HRMS: Found:  $m/z$  183.0085. Calcd for  $\text{C}_8\text{H}_6\text{ClNO}_2$ : ( $\text{M}^+$ ) 183.0082<sup>4</sup>.

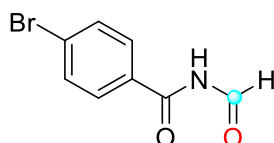

#### 4-bromo-*N*-formylbenzamide (2j)

This compound is a known compound that has been reported in a previous literature. Following the typical procedure, the title compound (34.0 mg, white solid) was obtained in 75% yield.  $^1\text{H}$  NMR (400 MHz,  $\text{CDCl}_3$ )  $\delta$  9.35(d,  $J$  = 8.0 Hz, 1H), 8.98 (br, 1H) 7.77 (dt,  $J$  = 8.0, 4.0 Hz, 2H), 7.69 (dt,  $J$  = 8.0, 4.0 Hz, 2H). APCI HRMS: Found:  $m/z$  225.951. Calcd for  $\text{C}_8\text{H}_5\text{BrNO}_2$ : ( $\text{M}^+$ ) 225.9509<sup>5</sup>.

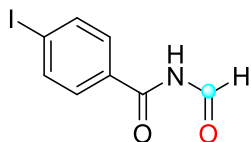

#### **N-formyl-4-iodobenzamide (2k)**

Following the typical procedure, the title compound (37.4 mg, white solid) was obtained 68% yield.  $^1\text{H}$  NMR (400 MHz,  $\text{CDCl}_3$ )  $\delta$  9.62 (br, 1H), 9.39 (d,  $J = 8.0$  Hz, 1H), 8.08 (d,  $J = 8.0$  Hz, 2H), 7.82 (d,  $J = 8.0$  Hz, 2H).  $^{13}\text{C}$  NMR (126 MHz,  $\text{CDCl}_3$ )  $\delta$  165.4, 164.04, 134.3, 128.3, 126.21, 126.18. EI HRMS: Found:  $m/z$  274.9440. Calcd for  $\text{C}_8\text{H}_6\text{INO}_2$ : ( $\text{M}^+$ ) 274.9443.

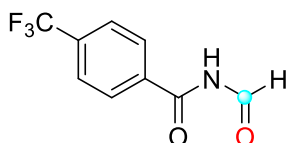

#### **N-formyl-4-(trifluoromethyl)benzamide (2l)**

Following the typical procedure, the title compound (33.0 mg, white solid) was obtained in 76% yield.  $^1\text{H}$  NMR (400 MHz,  $\text{CDCl}_3$ )  $\delta$  9.35(d,  $J = 8.0$  Hz, 1H), 9.21 (br, 1H), 7.91 (dt,  $J = 8.0, 4.0$  Hz, 2H), 7.63 (dt,  $J = 8.0, 4.0$  Hz, 2H).  $^{13}\text{C}$  NMR (126 MHz,  $d_6$ -DMSO)  $\delta$  166.7 (s), 164.4 (s), 135.4 (s), 132.8 (q,  $J = 32.0$  Hz), 129.3 (s), 125.6 (q,  $J = 3.6$  Hz), 123.7 (q,  $J = 272.8$  Hz).  $^{19}\text{F}$  NMR (376 MHz,  $\text{CDCl}_3$ )  $\delta$  -61.7 (s, 3F). EI HRMS: Found:  $m/z$  217.0348. Calcd for  $\text{C}_9\text{H}_6\text{F}_3\text{NO}_2$ : ( $\text{M}^+$ ) 217.0345.

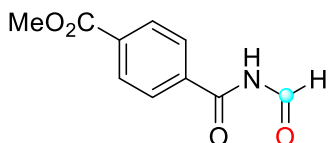

#### **Methyl 4-(formylcarbamoyl)benzoate (2m)**

This compound is a known compound that has been reported in a previous literature. Following the typical procedure, the title compound (32.3 mg, white solid) was obtained 78% yield.  $^1\text{H}$  NMR (400 MHz,  $\text{CD}_3\text{CN}$ )  $\delta$  9.62 (d,  $J = 8.0$  Hz, 1H), 9.38 (d,  $J = 8.0$  Hz, 1H), 8.19 (d,  $J = 8.0$  Hz, 2H), 8.01 (d,  $J = 8.0$  Hz, 2H), 3.97 (s, 3H).  $^{13}\text{C}$  NMR (126 MHz,  $\text{CDCl}_3$ )  $\delta$  165.8, 165, 163.7, 134.8, 134.50, 130.20, 128.0, 52.6. APCI HRMS: Found:  $m/z$  206.0466. Calcd for  $\text{C}_{10}\text{H}_8\text{NO}_4$ : ( $\text{M}^+$ ) 206.0459.

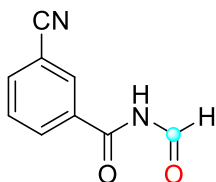

#### **3-cyano-N-formylbenzamide (2n)**

Following the typical procedure, the title compound (24.7 mg, white solid) was obtained in 71% yield.  $^1\text{H}$  NMR (400 MHz,  $\text{CD}_3\text{CN}$ )  $\delta$  9.69 (br, 1H), 9.25 (d,  $J = 12.0$  Hz, 1H), 8.27 (t,  $J = 4.0$  Hz, 1H), 8.18-8.15 (m, 1H), 7.99 (dt,  $J = 4.0, 8.0$  Hz, 1H), 7.73-7.69 (m, 1H).  $^{13}\text{C}$  NMR (126 MHz,  $d_6$ -DMSO)  $\delta$  166.1, 164.3, 136.6, 133.0, 132.8, 132.2, 130.1, 118.0, 111.9. APCI HRMS: Found:  $m/z$  173.0364. Calcd for  $\text{C}_9\text{H}_5\text{N}_2\text{O}_2$ : ( $\text{M}^+$ ) 173.0357.

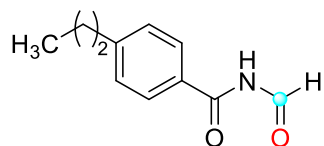

#### N-formyl-4-propylbenzamide (2o)

Following the typical procedure, the title compound (28.7 mg, white solid) was obtained in 75% yield.  $^1\text{H}$  NMR (400 MHz,  $\text{CDCl}_3$ )  $\delta$  9.37 (d,  $J = 12.0$  Hz, 1H), 9.16 (d,  $J = 12.0$  Hz, 1H), 7.83 (d,  $J = 8.0$  Hz, 2H), 7.34 (d,  $J = 8.0$  Hz, 2H), 2.67 (t,  $J = 8.0$  Hz, 2H), 1.72-1.63 (m, 2H), 0.95 (t,  $J = 8.0$  Hz, 3H).  $^{13}\text{C}$  NMR (126 MHz,  $\text{CDCl}_3$ )  $\delta$  166.2, 163.6, 149.7, 129.3, 128.5, 127.9, 38.0, 24.1, 13.7. APCI HRMS: Found:  $m/z$  190.088. Calcd for  $\text{C}_{11}\text{H}_{12}\text{NO}_2$ : ( $\text{M}^+$ ) 190.0874.

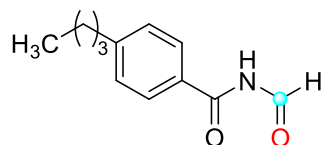

#### 4-butyl-N-formylbenzamide (2p)

Following the typical procedure, the title compound (30.8 mg, white solid) was obtained in 70% yield.  $^1\text{H}$  NMR (400 MHz,  $\text{CDCl}_3$ )  $\delta$  9.37 (d,  $J = 8.0$  Hz, 1H), 9.29 (d,  $J = 12.0$  Hz, 1H), 7.84 (d,  $J = 8.0$  Hz, 2H), 7.34 (d,  $J = 8.0$  Hz, 2H), 2.71 (t,  $J = 8.0$  Hz, 2H), 1.67-1.59 (m, 2H), 1.41-1.32 (m, 2H), 0.94 (t,  $J = 8.0$  Hz, 3H).  $^{13}\text{C}$  NMR (126 MHz,  $\text{CDCl}_3$ )  $\delta$  166.2, 163.7, 149.9, 129.2, 128.4, 127.93, 35.7, 33.1, 22.3, 13.9. APCI HRMS: Found:  $m/z$  204.1033. Calcd for  $\text{C}_{12}\text{H}_{14}\text{NO}_2$ : ( $\text{M}^+$ ) 204.103.

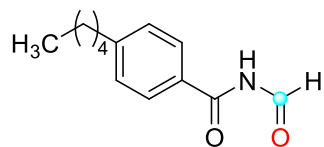

#### N-formyl-4-pentylbenzamide (2q)

Following the typical procedure, the title compound (23.7 mg, white solid) was obtained 54% yield.  $^1\text{H}$  NMR (400 MHz,  $\text{CDCl}_3$ )  $\delta$  9.36 (d,  $J = 12.0$  Hz, 1H), 8.90 (d,  $J = 8.0$  Hz, 1H), 7.80 (d,  $J = 8.0$  Hz, 2H), 7.34 (d,  $J = 8.0$  Hz, 2H), 2.69 (t,  $J = 8.0$  Hz, 2H), 1.68-1.61 (m, 2H), 1.36-1.30 (m, 4H), 0.89 (t,  $J = 8.0$  Hz, 3H).  $^{13}\text{C}$  NMR (126 MHz,  $\text{CDCl}_3$ )  $\delta$  166.1, 163.3, 150.0, 129.2, 128.5, 127.9, 36.0, 31.4, 30.7, 22.5, 14.0. APCI HRMS: Found:  $m/z$  218.1194. Calcd for  $\text{C}_{13}\text{H}_{16}\text{NO}_2$ : ( $\text{M}^+$ ) 218.1187.

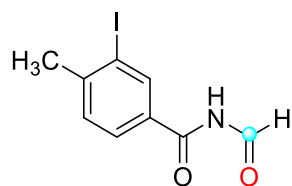

#### N-formyl-3-iodo-4-methylbenzamide (2r)

Following the typical procedure, the title compound (24.9 mg, white solid) was obtained 43% yield.  $^1\text{H}$  NMR (400 MHz,  $\text{CDCl}_3$ )  $\delta$  9.34 (d,  $J = 12.0$  Hz, 1H), 8.93 (br, 1H), 8.34 (d,  $J = 4.0$  Hz, 1H), 7.75 (dd,  $J = 4.0, 8.0$  Hz, 1H), 7.38 (d,  $J = 8.0$  Hz, 1H), 2.52 (s, 3H).  $^{13}\text{C}$  NMR (126 MHz,  $\text{CDCl}_3$ )  $\delta$  164.7, 163.3, 148.3, 138.5, 130.2, 130.1, 127.3, 28.4. APCI HRMS: Found:  $m/z$  288.9603. Calcd for  $\text{C}_9\text{H}_8\text{INO}_2$ : ( $\text{M}^+$ ) 288.9600.

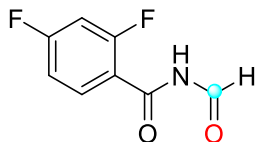

### 2, 4-difluoro-N-formylbenzamide (2s)

Following the typical procedure, the title compound (24.1 mg, white solid) was obtained in 65% yield.  $^1\text{H}$  NMR (400 MHz,  $\text{CDCl}_3$ )  $\delta$  9.39 (dd,  $J = 4.0, 8.0$  Hz, 1H), 8.98 (br, 1H), 8.16-8.22 (m, 1H), 7.11-7.06 (m, 1H), 6.96 (ddd,  $J = 4.0, 12.0, 16$  Hz, 1H).  $^{13}\text{C}$  NMR (126 MHz,  $\text{CDCl}_3$ )  $\delta$ . 167.5 (d,  $J = 14.3$  Hz), 162.8 (d,  $J = 13.1$  Hz), 162.4, 162.1 (d,  $J = 3.5$  Hz), 134.3 (dd,  $J = 10.6, 2.5$  Hz), 113.4 (dd,  $J = 21.6, 3.0$  Hz), 105.0 (dd,  $J = 28.1, 26.2$  Hz).  $^{19}\text{F}$  NMR (376 MHz,  $\text{CDCl}_3$ )  $\delta$  -98.74(-98.64) (m, 1F), -107.07(-107.02) (m, 1F). APCI HRMS: Found:  $m/z$  184.0221. Calcd for  $\text{C}_8\text{H}_4\text{F}_2\text{NO}_2$ : (M<sup>+</sup>) 184.0216.

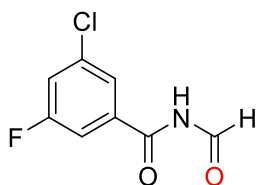

### 3-chloro-5-fluoro-N-formylbenzamide (2t)

Following the typical procedure, the title compound (31.85 mg, white solid) was obtained 79% yield.  $^1\text{H}$  NMR (400 MHz,  $\text{CDCl}_3$ )  $\delta$  9.26 (d,  $J = 8.0$  Hz, 1H), 9.07 (br, 1H), 7.84 (dd,  $J = 4.0, 8.0$  Hz, 1H), 7.24 (dd,  $J = 4.0, 8.0$  Hz, 1H), 7.17-7.12 (m, 1H).  $^{13}\text{C}$  NMR (126 MHz,  $\text{CDCl}_3$ )  $\delta$  165.5, 164.3 (d,  $J = 200.8$  Hz), 162.3, 162.2, 133.1 (d,  $J = 9.7$  Hz), 127.9 (d,  $J = 3.6$  Hz). 118.5 (d,  $J = 25.2$  Hz), 115.3 (d,  $J = 21.5$  Hz).  $^{19}\text{F}$  NMR (376 MHz,  $\text{CDCl}_3$ )  $\delta$  -103.35 (q,  $J = 7.53$  Hz, 1F). APCI HRMS: Found:  $m/z$  199.9926. Calcd for  $\text{C}_8\text{H}_4\text{ClFNO}_2$ : (M<sup>+</sup>) 199.992.

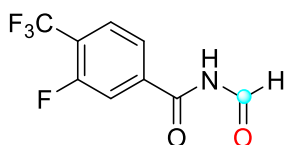

### 3-fluoro-N-formyl-4-(trifluoromethyl)benzamide (2u)

Following the typical procedure, the title compound (42.8 mg, white solid) was obtained 91% yield.  $^1\text{H}$  NMR (400 MHz,  $\text{CDCl}_3$ )  $\delta$  10.54 (d,  $J = 8.0$  Hz, 1H), 9.40 (d,  $J = 8.0$  Hz, 1H), 8.38 (dd,  $J = 4.0, 8.0$  Hz, 1H), 8.30-8.26 (m, 1H), 7.40 (t,  $J = 8.0$  Hz, 1H).  $^{13}\text{C}$  NMR (126 MHz,  $\text{CDCl}_3$ )  $\delta$  118.0 (d,  $J = 21.5$  Hz), 119.65 (dd,  $J = 34.0, 13.4$  Hz), 121.8 (d,  $J = 273.0$  Hz), 127.5 (d,  $J = 3.6$  Hz), 128.80 – 127.96 (m), 163.0 (d,  $J = 266.3$  Hz), 164.4, 165.1.  $^{19}\text{F}$  NMR (376 MHz,  $\text{CDCl}_3$ )  $\delta$  -61.7 (d,  $J = 11.28$  Hz, 3F), -104.88 (q,  $J = 11.28$  Hz, 1F). EI HRMS: Found:  $m/z$  235.0261. Calcd for  $\text{C}_9\text{H}_5\text{F}_4\text{NO}_2$ : (M<sup>+</sup>) 235.0251.

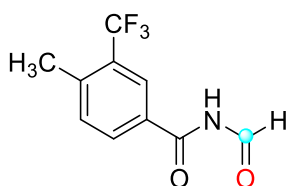

### **N-formyl-4-methyl-3-(trifluoromethyl)benzamide (2v)**

Following the typical procedure, the title compound (37.0 mg, white solid) was obtained in 80% yield.  $^1\text{H}$  NMR (400 MHz,  $\text{CDCl}_3$ )  $\delta$  10.2 (d,  $J = 8.0$  Hz, 1H), 9.4 (d,  $J = 8.0$  Hz, 1H), 8.27 (d, 1H), 8.06 (dd,  $J = 8.0$  Hz, 1H), 7.49 (d,  $J = 8.0$  Hz, 1H), 2.59 (q,  $J = 4.0$  Hz, 3H).  $^{13}\text{C}$  NMR (126 MHz,  $\text{CDCl}_3$ )  $\delta$  165.4 (s), 164.7 (s), 143.5 (s), 132.8 (s), 130.9 (s), 130.1 (q,  $J = 30.4$  Hz), 129.0 (s), 126.0 (q,  $J = 5.6$  Hz), 123.78 (q,  $J = 274.0$  Hz).  $^{19}\text{F}$  NMR (376 MHz,  $\text{CDCl}_3$ )  $\delta$  -61.6 (s, 3F). EI HRMS: Found:  $m/z$  231.0498. Calcd for  $\text{C}_{10}\text{H}_8\text{NO}_2$ : ( $\text{M}^+$ ) 231.0502.

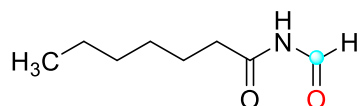

### **N-formylheptanamide (2x)**

Following the typical procedure, the title compound (17.3 mg, white solid) was obtained 55% yield.  $^1\text{H}$  NMR (400 MHz,  $\text{CDCl}_3$ )  $\delta$  9.42 (br, 1H), 9.11 (d,  $J = 8.0$  Hz, 1H), 2.38 (t,  $J = 8.0$  Hz, 2H), 1.70-1.62 (m, 2H), 1.35-1.26 (m, 6H), 0.87 (t,  $J = 8.0$  Hz, 3H).  $^{13}\text{C}$  NMR (126 MHz,  $\text{CDCl}_3$ )  $\delta$  173.7, 163.7, 36.6, 31.3, 28.6, 24.1, 22.4, 13.9. APCI HRMS: Found:  $m/z$  156.1035. Calcd for  $\text{C}_8\text{H}_{14}\text{NO}_2$ : ( $\text{M}^+$ ) 156.103.

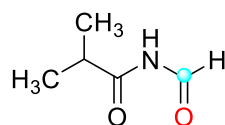

### **N-formylisobutyramide (2y)**

Following the typical procedure, the title compound (16.3 mg, white solid) was obtained 71% yield.  $^1\text{H}$  NMR (400 MHz,  $\text{CDCl}_3$ )  $\delta$  9.58 (br, 1H), 9.13 (d,  $J = 8.0$  Hz, 1H), 2.60-2.50 (m, 1H), 1.21 (d,  $J = 8.0$  Hz, 3H), 1.21 (d,  $J = 8.0$  Hz, 3H).  $^{13}\text{C}$  NMR (126 MHz,  $\text{CDCl}_3$ )  $\delta$  177.5, 164.2, 35.7, 18.3. APCI HRMS: Found:  $m/z$  114.0563. Calcd for  $\text{C}_5\text{H}_8\text{NO}_2$ : ( $\text{M}^+$ ) 114.0561.

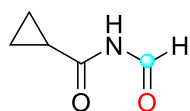

### **N-formylcyclopropanecarboxamide (2z)**

Following the typical procedure, the title compound (14.5 mg, white solid) was obtained 64% yield.  $^1\text{H}$  NMR (400 MHz,  $\text{CDCl}_3$ )  $\delta$  9.92 (br, 1H), 9.11 (d,  $J = 12.0$  Hz, 1H), 1.65-1.56 (m, 1H), 1.17-1.13 (m, 2H), 1.02-0.98 (m, 2H).  $^{13}\text{C}$  NMR (126 MHz,  $\text{CDCl}_3$ )  $\delta$  174.9, 163.9, 14.9, 10.1, 8.9. APCI HRMS: Found:  $m/z$  112.0403. Calcd for  $\text{C}_5\text{H}_6\text{NO}_2$ : ( $\text{M}^+$ ) 112.040

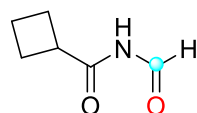

### **N-formylcyclobutanecarboxamide (2aa)**

Following the typical procedure, the title compound (16.0 mg, white solid) was obtained in 63% yield.  $^1\text{H}$  NMR (400 MHz,  $\text{CDCl}_3$ )  $\delta$  9.11 (d,  $J = 12.0$  Hz, 1H), 8.99 (br, 1H), 3.23-3.14 (m, 1H), 2.39-2.32 (m, 2H), 2.30-2.20 (m, 2H), 2.09-2.02 (m, 1H), 1.98-1.87 (m, 1H).  $^{13}\text{C}$  NMR (126 MHz,  $\text{CDCl}_3$ )  $\delta$  175.1, 163.5, 39.6, 24.5, 18.0. APCI HRMS: Found:  $m/z$  126.0564. Calcd for  $\text{C}_6\text{H}_8\text{NO}_2$ : ( $\text{M}^+$ )

126.0561.

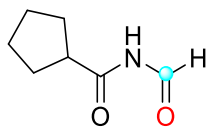

**N-formylcyclopentanecarboxamide (2ab)**

Following the typical procedure, the title compound (14.4 mg, white solid) was obtained in 51% yield. <sup>1</sup>H NMR (400 MHz, CDCl<sub>3</sub>) δ 9.14 (d, *J* = 12.0 Hz, 1H), 8.85 (br, 1H), 2.77-2.69 (m, 1H), 1.98-1.90 (m, 2H), 1.88-1.81 (m, 2H), 1.79-1.70 (m, 2H), 1.68-1.59 (m, 2H). <sup>13</sup>C NMR (126 MHz, CDCl<sub>3</sub>) δ 176.3, 163.0 (s), 45.7, 29.5, 25.9. EI HRMS: Found: *m/z* 141.0783. Calcd for C<sub>7</sub>H<sub>11</sub>NO<sub>2</sub>: (M<sup>+</sup>) 141.0784.

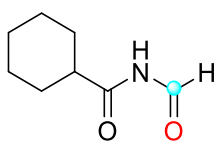

**N-formylcyclohexanecarboxamide (2ac)**

This compound is a known compound that has been reported in a previous literature. Following the typical procedure, the title compound (17.7 mg, white solid) was obtained in 57% yield. <sup>1</sup>H NMR (400 MHz, CDCl<sub>3</sub>) δ 9.14 (d, *J* = 12.0 Hz, 1H), 8.88 (br, 1H), 2.30-2.22 (m, 1H), 1.92-1.88 (m, 2H), 1.84-1.80 (m, 2H), 1.52-1.42 (m, 2H), 1.36-1.18 (m, 4H). EI HRMS: Found: *m/z* 155.094. Calcd for C<sub>8</sub>H<sub>13</sub>NO<sub>2</sub>: (M<sup>+</sup>) 155.0941<sup>6</sup>.

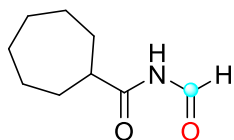

**N-formylcycloheptanecarboxamide (2ad)**

Following the typical procedure, the title compound (24.4 mg, white solid) was obtained 72% yield. <sup>1</sup>H NMR (400 MHz, CDCl<sub>3</sub>) δ 9.13 (d, *J* = 12.0 Hz, 1H), 8.98 (br, 1H), 2.46-2.39 (m, 1H), 1.96-1.90 (m, 2H), 1.80-1.65 (m, 5H), 1.59-1.46 (m, 5H). <sup>13</sup>C NMR (126 MHz, CDCl<sub>3</sub>) δ 177.0, 163.7, 47.0, 30.33, 28.13, 26.3. APCI HRMS: Found: *m/z* 168.1034. Calcd for C<sub>9</sub>H<sub>14</sub>NO<sub>2</sub>: (M<sup>+</sup>) 168.103.

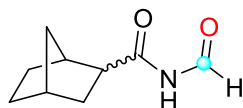

**(1S, 4R)-N-formylbicyclo[2.2.1]heptane-2-carboxamide (2ae, dr = 1:2)**

Following the typical procedure, the title compound (23.1 mg, white solid) was obtained 69% yield. <sup>1</sup>H NMR (400 MHz, CDCl<sub>3</sub>) δ 9.40-9.38 (br 1x1H+2x1H), 9.15 (d, *J* = 8.0 Hz, 1H), 9.10 (d, *J* = 12.0 Hz, 2x1H), 2.81-2.76 (m, 1H), 2.59 (t, *J* = 4.0 Hz, 1H), 2.50 (d, *J* = 4.0 Hz, 2H), 2.35-2.29 (m, 5H), 1.94-1.88 (m, 2H), 1.79-1.74 (m, 1H), 1.66-1.40 (m, 13H), 1.31-1.26 (m, 4H), 1.24-1.18 (m, 4H). <sup>13</sup>C NMR (126 MHz, CDCl<sub>3</sub>) δ 175.7, 174.8, 164.0, 163.9, 48.3, 47.9, 40.9, 40.6, 40.2, 36.9, 36.3, 35.9, 33.0, 30.4, 29.4, 28.9, 28.5, 24.4. APCI HRMS: Found: *m/z* 166.0874. Calcd for C<sub>9</sub>H<sub>12</sub>NO<sub>2</sub>: (M<sup>+</sup>) 166.0874.



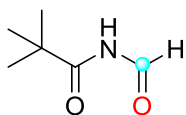

#### **N-formylpivalamide (2af)**

Following the typical procedure, the title compound (15.8 mg, white solid) was obtained in 61% yield.  $^1\text{H}$  NMR (400 MHz,  $\text{CDCl}_3$ )  $\delta$  9.16 (d,  $J = 12.0$  Hz, 1H), 8.66 (br, 1H), 1.26 (s, 9H).  $^{13}\text{C}$  NMR (126 MHz,  $\text{CDCl}_3$ )  $\delta$  178.5, 163.5, 29.7, 26.6. APCI HRMS: Found:  $m/z$  128.0715. Calcd for  $\text{C}_6\text{H}_{10}\text{NO}_2$ : ( $\text{M}^+$ ) 128.0717.

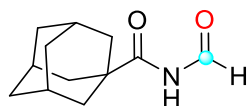

#### **(3r,5r,7r)-N-formyladamantane-1-carboxamide (2ag)**

Following the typical procedure, the title compound (24.9 mg, white solid) was obtained 60% yield.  $^1\text{H}$  NMR (400 MHz,  $\text{CDCl}_3$ )  $\delta$  9.17 (d,  $J = 8.0$  Hz, 1H), 8.58 (br 1H), 2.09-2.10 (m, 3H), 1.88 (d, 6H), 1.70-1.79 (m, 7H).  $^{13}\text{C}$  NMR (126 MHz,  $\text{CDCl}_3$ )  $\delta$  177.8, 163.4, 38.7, 38.2, 36.3, 36.1, 27.8, 27.7. EI HRMS: Found:  $m/z$  207.1249 Calcd for  $\text{C}_{12}\text{H}_{17}\text{NO}_2$ : ( $\text{M}^+$ ) 207.1254.

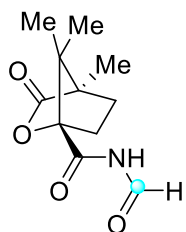

#### **(1S,4R)-N-formyl-4,7,7-trimethyl-3-oxo-2-oxabicyclo[2.2.1]heptane-1-carboxamide (2ah)**

Following the typical procedure, the title compound (33.8 mg, white solid) was obtained in 75% yield.  $^1\text{H}$  NMR (400 MHz,  $\text{CDCl}_3$ )  $\delta$  9.18 (d,  $J = 8.0$  Hz, 1H), 8.83 (br, 1H), 2.56-2.48 (m, 1H), 2.03-1.98 (m, 2H), 1.78-1.71 (m, 1H), 1.14 (s, 3H), 1.11 (s, 3H), 0.98 (s, 3H).  $^{13}\text{C}$  NMR (126 MHz,  $\text{CDCl}_3$ )  $\delta$  176.8, 168.5, 160.8, 91.18, 55.58, 55.0, 30.50, 28.8, 16.5, 16.5, 9.6. APCI HRMS: Found:  $m/z$  224.0935. Calcd for  $\text{C}_{11}\text{H}_{14}\text{NO}_4$ : ( $\text{M}^+$ ) 224.0928.

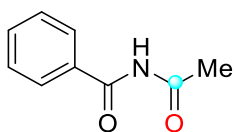

#### **N-acetylbenzamide (2ai)**

Following the typical procedure, the title compound (13.4 mg, white solid) was obtained in 41% yield.  $^1\text{H}$  NMR (400 MHz,  $\text{CD}_3\text{CN}$ )  $\delta$  8.13-8.11 (m, 2H), 7.61-7.57 (m, 1H), 7.55-7.50 (m, 2H), 2.48 (s, 3H).  $^{13}\text{C}$  NMR (126 MHz,  $\text{CDCl}_3$ )  $\delta$  173.2, 165.5, 133.3, 132.7, 129.1, 127.6, 25.5. EI HRMS: Found:  $m/z$  162.0548. Calcd for  $\text{C}_9\text{H}_8\text{NO}_2$ : ( $\text{M}^+$ ) 162.055.

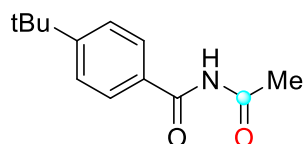

#### **N-acetyl-4-(tert-butyl) benzamide (2aj)**

Following the typical procedure, the title compound (18.0 mg, white solid) was obtained in 41% yield.  $^1\text{H}$  NMR (400 MHz,  $\text{CDCl}_3$ )  $\delta$  8.58 (br, 1H), 7.9 (dt,  $J = 8.0, 4.0$  Hz, 2H), 7.52 (dt,  $J = 8.0, 4.0$  Hz, 2H), 2.62 (s, 3H), 1.35 (s, 9H).  $^{13}\text{C}$  NMR (126 MHz,  $\text{CDCl}_3$ )  $\delta$  173.2, 165.3, 157.2, 129.7, 127.5, 126.0, 35.2, 31.0, 25.5. EI HRMS: Found:  $m/z$  219.1249. Calcd for  $\text{C}_{13}\text{H}_{17}\text{NO}_2$ : ( $\text{M}^+$ ) 219.1254.

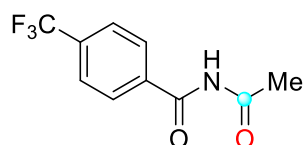

#### **N-acetyl-4-(trifluoromethyl)benzamide (2ak)**

This compound is a known compound that has been reported in a previous literature. Following the typical procedure, the title compound (26.4 mg, white solid) was obtained in 57% yield.  $^1\text{H}$  NMR (400 MHz,  $\text{CDCl}_3$ )  $\delta$  9.15 (br 1H), 8.02 (d,  $J = 8.0$  Hz, 2H), 7.78 (d,  $J = 8.0$  Hz, 2H), 2.63 (s, 3H).  $^{19}\text{F}$  NMR (376 MHz,  $\text{CDCl}_3$ )  $\delta$  -63.2 (s, 3F) EI HRMS: Found:  $m/z$  231.05. Calcd for  $\text{C}_{10}\text{H}_8\text{F}_3\text{NO}_2$ : ( $\text{M}^+$ ) 231.0502<sup>7</sup>.

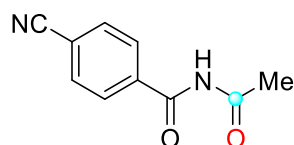

#### **N-acetyl-4-cyanobenzamide (2al)**

Following the typical procedure, the title compound (16.2 mg, white solid) was obtained in 43% yield.  $^1\text{H}$  NMR (400 MHz,  $\text{CD}_3\text{CN}$ )  $\delta$  8.67 (br, 1H), 7.97 (dt,  $J = 4.0, 8.0$  Hz, 2H), 7.82 (dt,  $J = 4.0, 8.0$  Hz, 2H), 2.62 (s, 3H).  $^{13}\text{C}$  NMR (126 MHz,  $\text{CDCl}_3$ )  $\delta$  173.5, 164.3, 136.5, 132.7, 128.4, 117.5, 116.7, 25.7. APCI HRMS: Found:  $m/z$  187.0519. Calcd for  $\text{C}_{10}\text{H}_7\text{N}_2\text{O}_2$ : ( $\text{M}^+$ ) 187.0513.

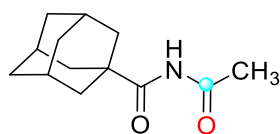

#### **(3r, 5r, 7r)-N-acetyladamantane-1-carboxamide (2am)**

Following the typical procedure, the title compound (27.4 mg, white solid) was obtained 62% yield.  $^1\text{H}$  NMR (400 MHz,  $\text{CDCl}_3$ )  $\delta$  8.10 (br 1H), 2.46 (s, 3H), 2.11-2.05 (m, 3H), 1.86 (d, 6H), 1.77-1.67 (m, 6H).  $^{13}\text{C}$  NMR (126 MHz,  $\text{CDCl}_3$ )  $\delta$  176.6, 173.5, 41.9, 39.9, 38.6, 38.2, 36.1, 35.7, 27.8, 25.5. EI HRMS: Found:  $m/z$  221.1409. Calcd for  $\text{C}_{13}\text{H}_{19}\text{NO}_2$ : ( $\text{M}^+$ ) 221.141.

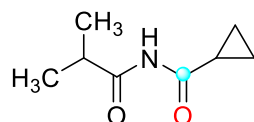

## ***N*-isobutyrylcyclopropanecarboxamide (2an)**

Following the typical procedure, the title compound (18.6mg, white solid) was obtained 60% yield. <sup>1</sup>H NMR (400 MHz, CDCl<sub>3</sub>) δ 8.12 (br 1H), 2.90-2.80 (m, 1H), 2.50-2.42 (m, 1H), 1.21 (s, 3H), 1.19 (s, 3H), 1.15-1.11 (m, 2H), 1.00-0.95 (m, 2H). <sup>13</sup>C NMR (126 MHz, CDCl<sub>3</sub>) δ 10.5, 14.8, 18.9, 36.1, 175.4, 177.3). EI HRMS: Found: m/z 155.0950. Calcd for C<sub>8</sub>H<sub>13</sub>NO<sub>2</sub>: (M<sup>+</sup>) 155.0946.

## **9. References**

1. Bai, F.; Wang, N.; Bai, Y.; Ma, X.; Gu, C.; Dai, B.; Chen, J., NHPI-Mediated Electrochemical  $\alpha$ -Oxygenation of Amides to Benzimides. *The Journal of Organic Chemistry* **2023**, *88* (5), 2985-2998.
2. Aiken, S.; Anozie, K.; de Azevedo, O. D. C. C.; Cowen, L.; Edgar, R. J. L.; Gabbutt, C. D.; Heron, B. M.; Lawrence, P. A.; Mills, A. J.; Rice, C. R.; Urquhart, M. W. J.; Zonidis, D., Expedient synthesis of highly substituted 3,4-dihydro-1,2-oxathiine 2,2-dioxides and 1,2-oxathiine 2,2-dioxides: revisiting sulfene additions to enaminketones. *Org. Biomol. Chem.* **2019**, *17* (44), 9585-9604.
3. Zhang, Q.; Lin, X.-T.; Fukaya, N.; Fujitani, T.; Sato, K.; Choi, J.-C., Selective N-formylation/N-methylation of amines and N-formylation of amides and carbamates with carbon dioxide and hydrosilanes: promotion of the basic counter anions of the zinc catalyst. *Green Chem.* **2020**, *22* (23), 8414-8422.
4. Niu, Z.; Lin, S.; Dong, Z.; Sun, H.; Liang, F.; Zhang, J., Otherwise inert reaction of sulfonamides/carboxamides with formamides via proton transfer-enhanced reactivity. *Org. Biomol. Chem.* **2013**, *11* (15), 2460-2465.
5. Sambaiah, M.; Gudipati, R.; Shiva Kumar, K.; Yennam, S.; Behera, M., An efficient method for the preparation of N-formyl-imide via amidine using propylphosphonic anhydride (T3P®). *Tetrahedron Lett.* **2016**, *57* (3), 403-406.
6. Bhat, S. A.; Bhat, M. Y.; Rather, S. A.; Gani, I.; Bhat, K. A.; Ahmed, Q. N., Iodine and ammonium persulfate mediated activation of DMSO: an approach to N-formylation of amides and synthesis of isatins. *Org. Biomol. Chem.* **2022**, *20* (42), 8197-8202.
7. Cao, M.; Liu, L.; Tang, S.; Peng, Z.; Wang, Y., Palladium-Catalyzed Solvent-Controlled Selective Synthesis of Acyl Isoureas and Imides from Amides, Isocyanides, Alcohols and Carboxylates. *Adv. Synth. Catal.* **2019**, *361* (8), 1887-1895.

## 10. NMR Spectrum of prepared compounds ( $^1\text{H}$ NMR; $^{13}\text{C}$ NMR; $^{19}\text{F}$ NMR *etc.*)

$^1\text{H}$  NMR (400 MHz,  $\text{CDCl}_3$ ) spectra for compound **1o**

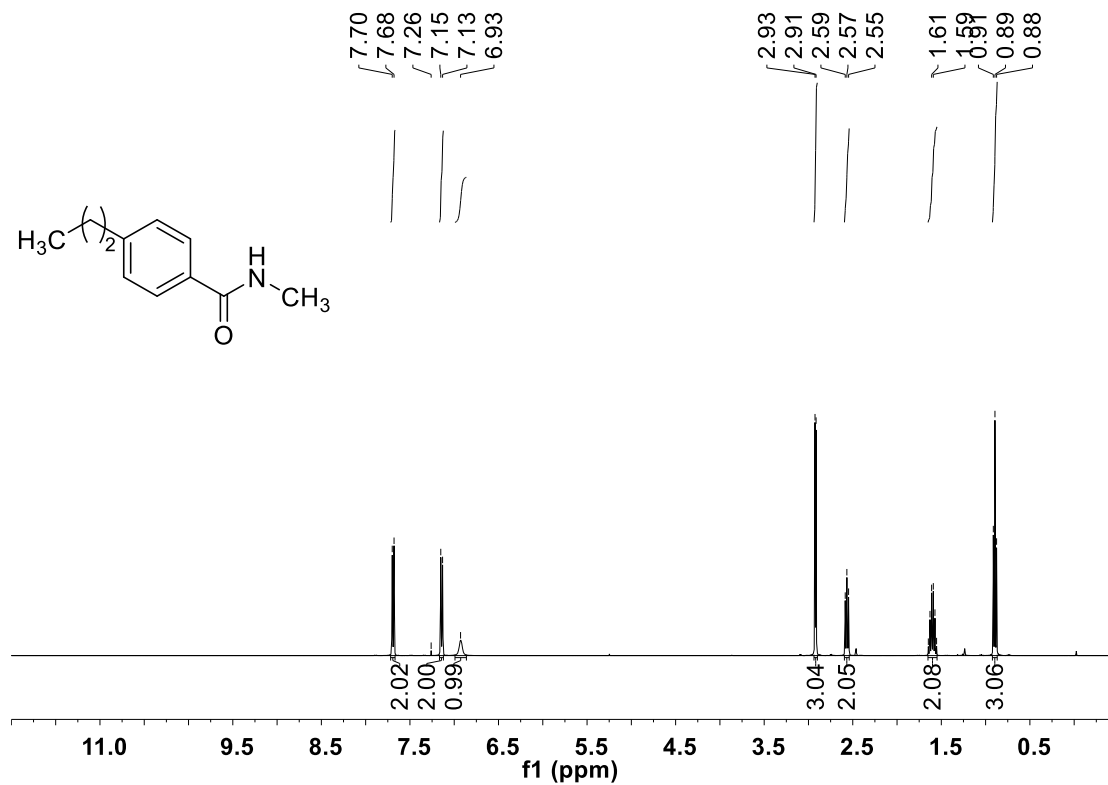

$^{13}\text{C}$  NMR (126 MHz,  $\text{CDCl}_3$ ) spectra for compound **1o**

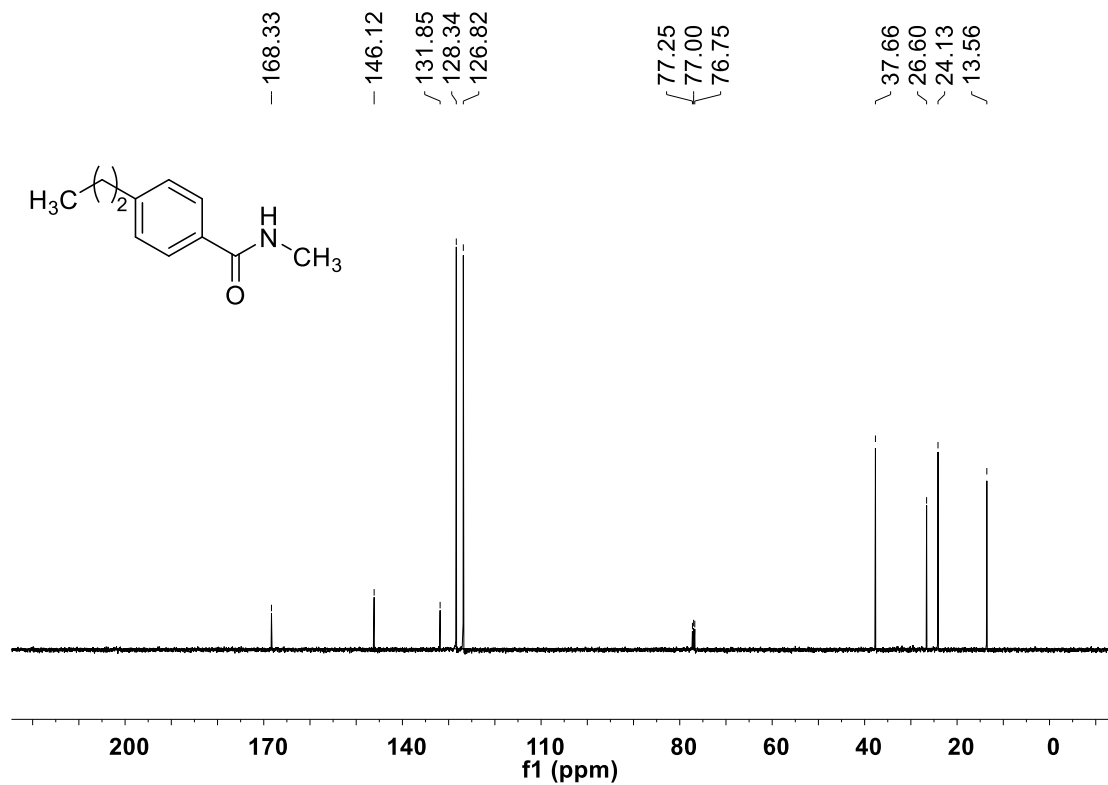

<sup>1</sup>H NMR (400 MHz, CDCl<sub>3</sub>) spectra for compound **1q**

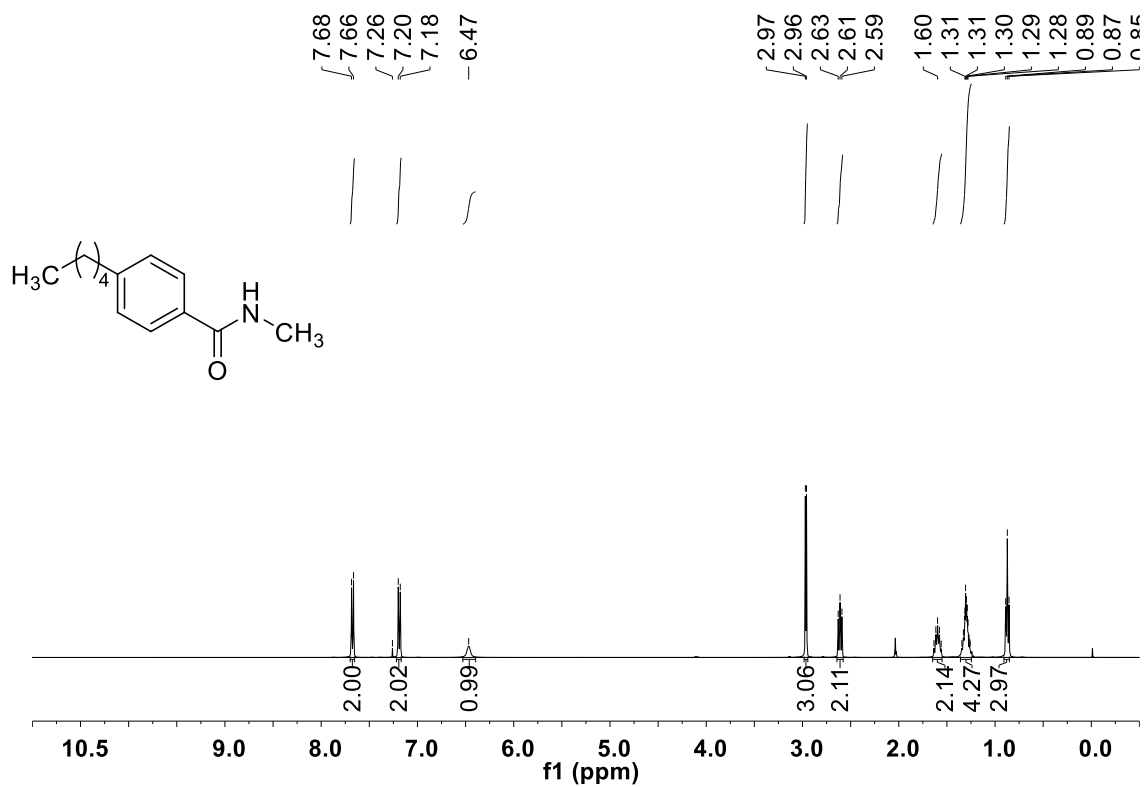

<sup>13</sup>C NMR (126 MHz, CDCl<sub>3</sub>) spectra for compound **1q**

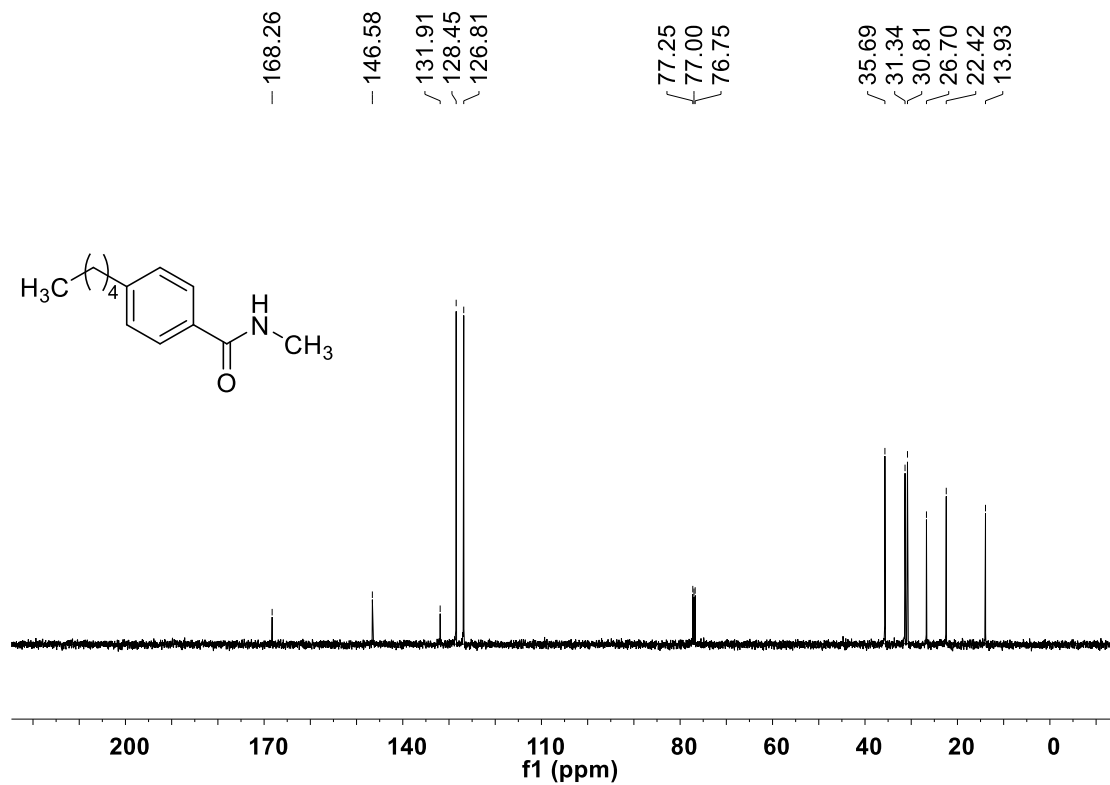

$^1\text{H}$  NMR (400 MHz,  $\text{CDCl}_3$ ) spectra for compound **1r**

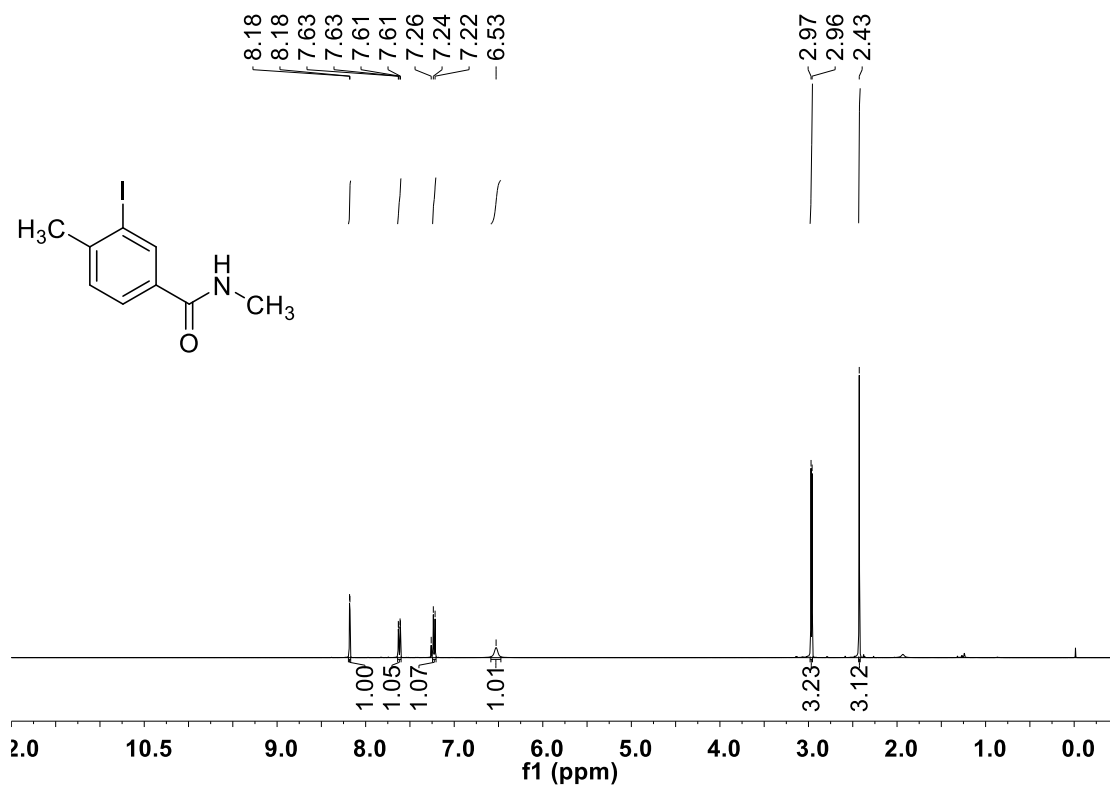

$^{13}\text{C}$  NMR (126 MHz,  $\text{CDCl}_3$ ) spectra for compound **1r**

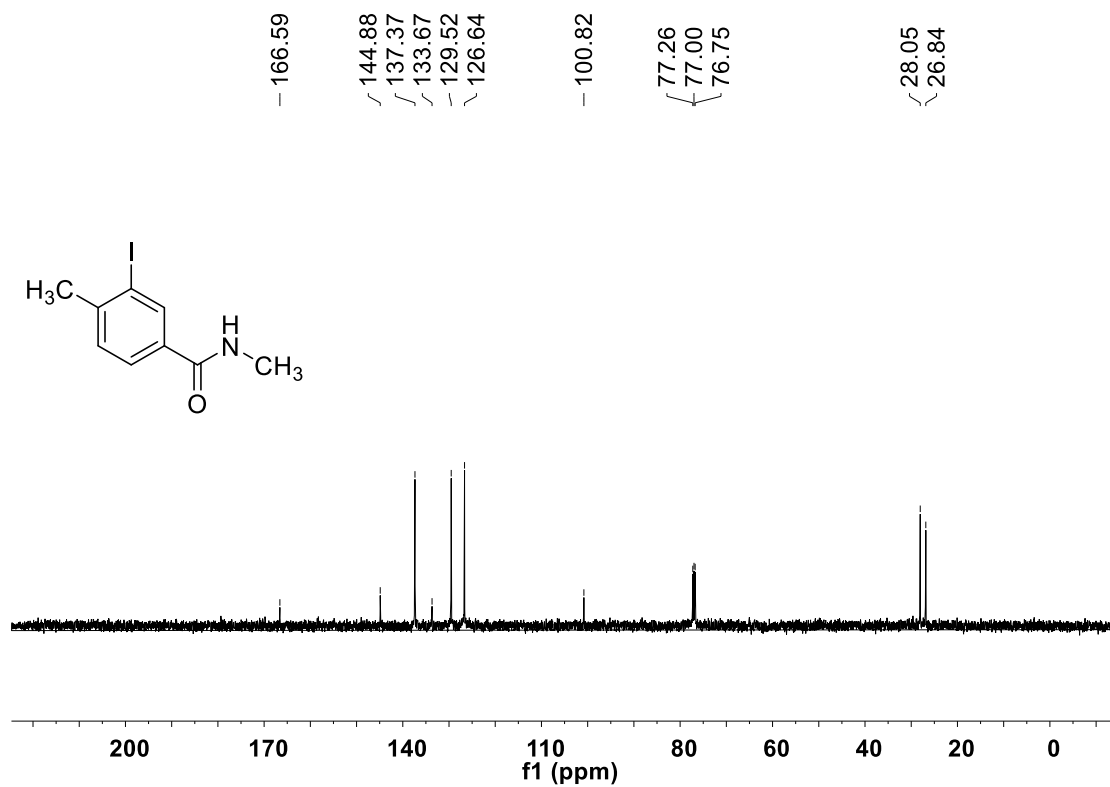

<sup>1</sup>H NMR (400 MHz, CDCl<sub>3</sub>) spectra for compound **1t**

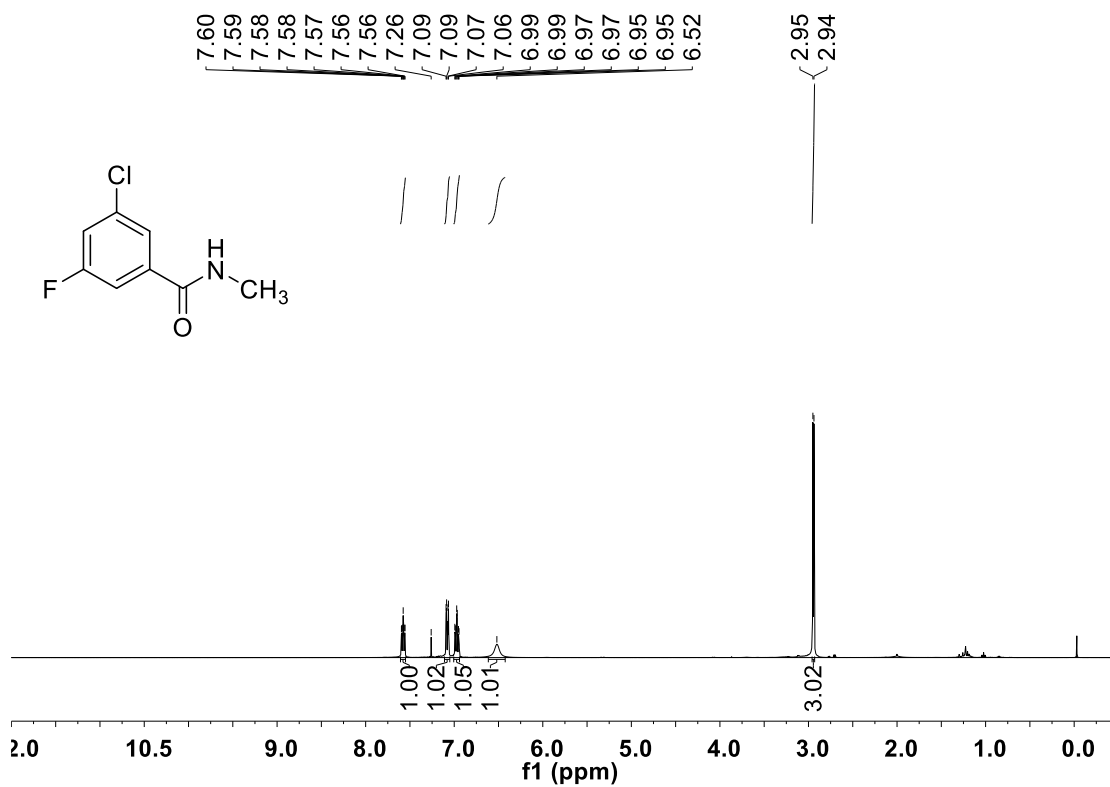

<sup>13</sup>C NMR (126 MHz, CDCl<sub>3</sub>) spectra for compound **1t**

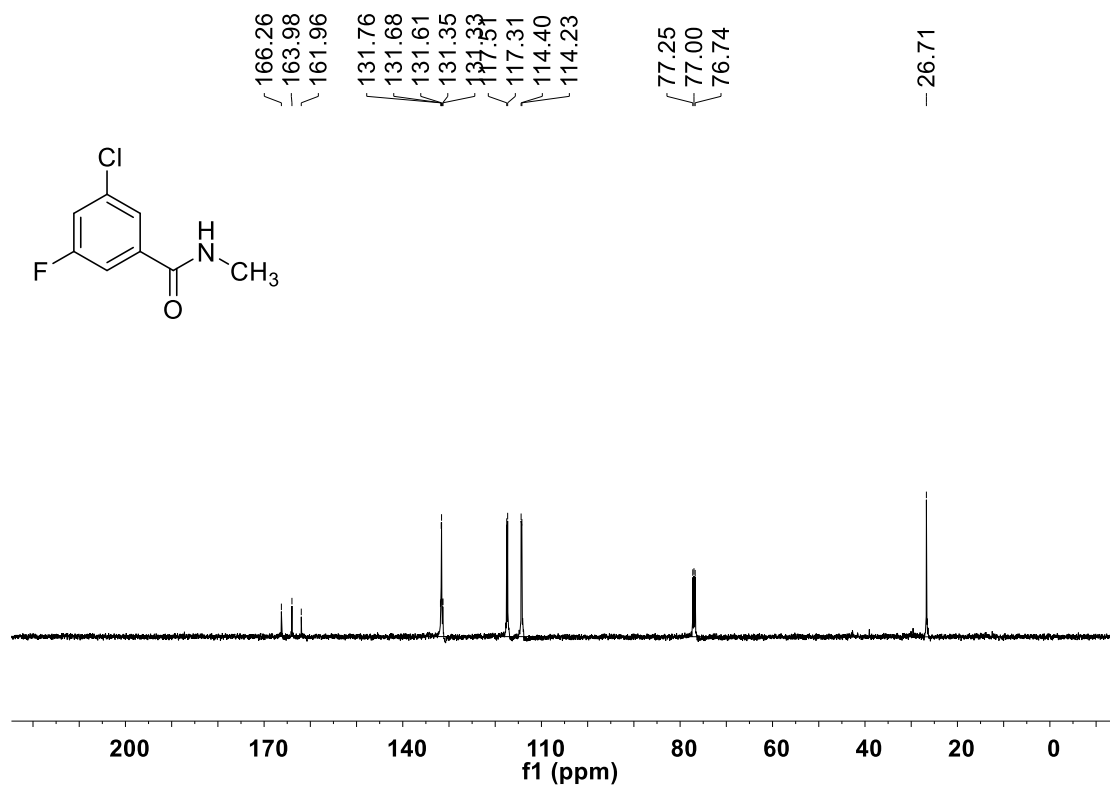

$^{19}\text{F}$  NMR (377 MHz,  $\text{CDCl}_3$ ) spectra for compound **1t**

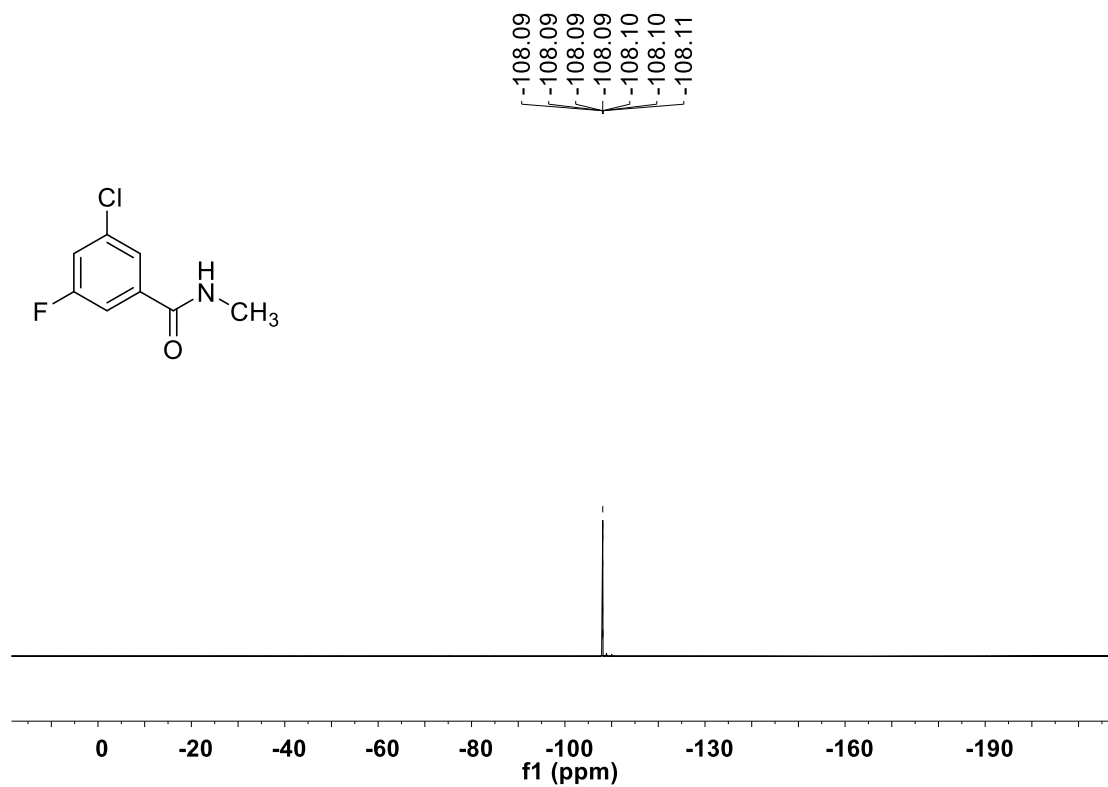

$^1\text{H}$  NMR (400 MHz,  $\text{CDCl}_3$ ) spectra for compound **1u**

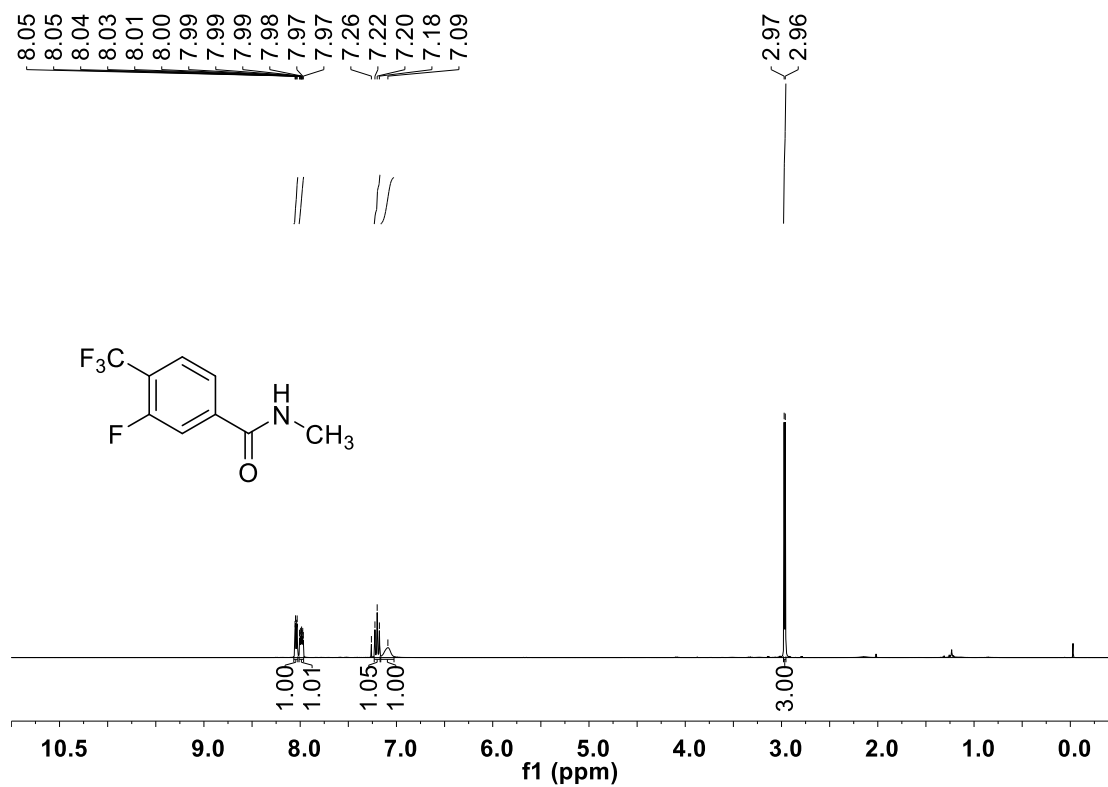



<sup>13</sup>C NMR (126 MHz, CDCl<sub>3</sub>) spectra for compound **1u**

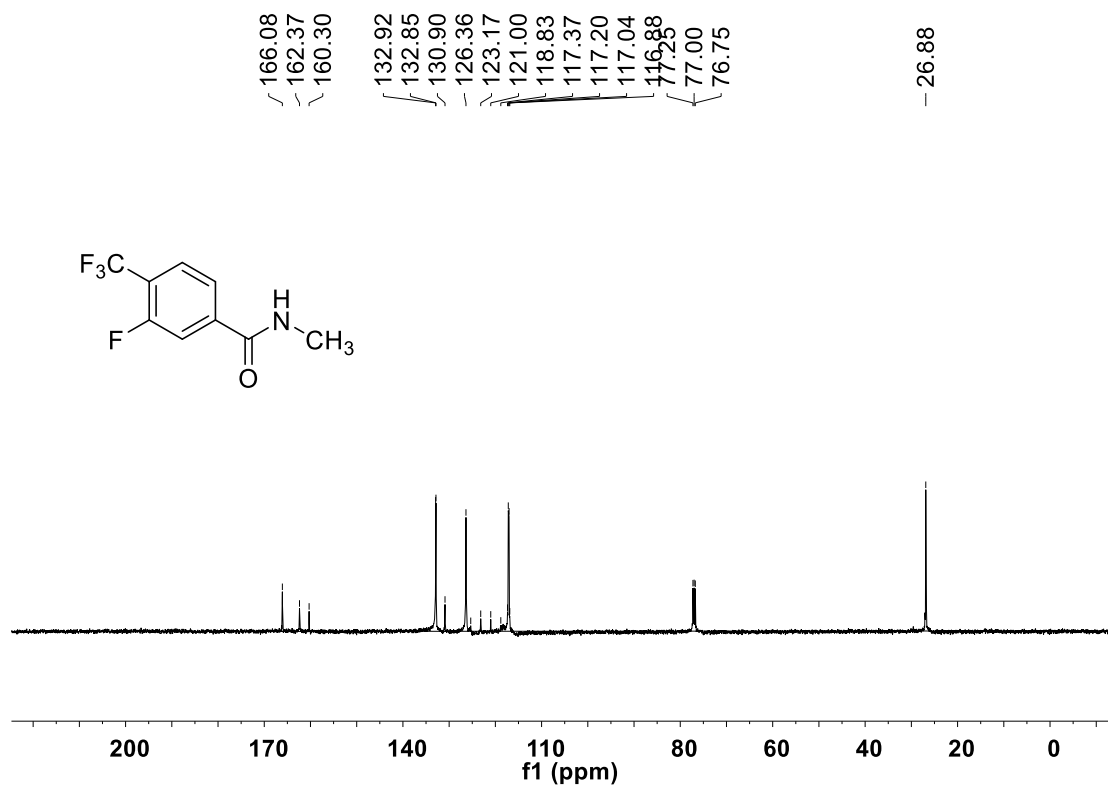

<sup>19</sup>F NMR (377 MHz, CDCl<sub>3</sub>) spectra for compound **1u**

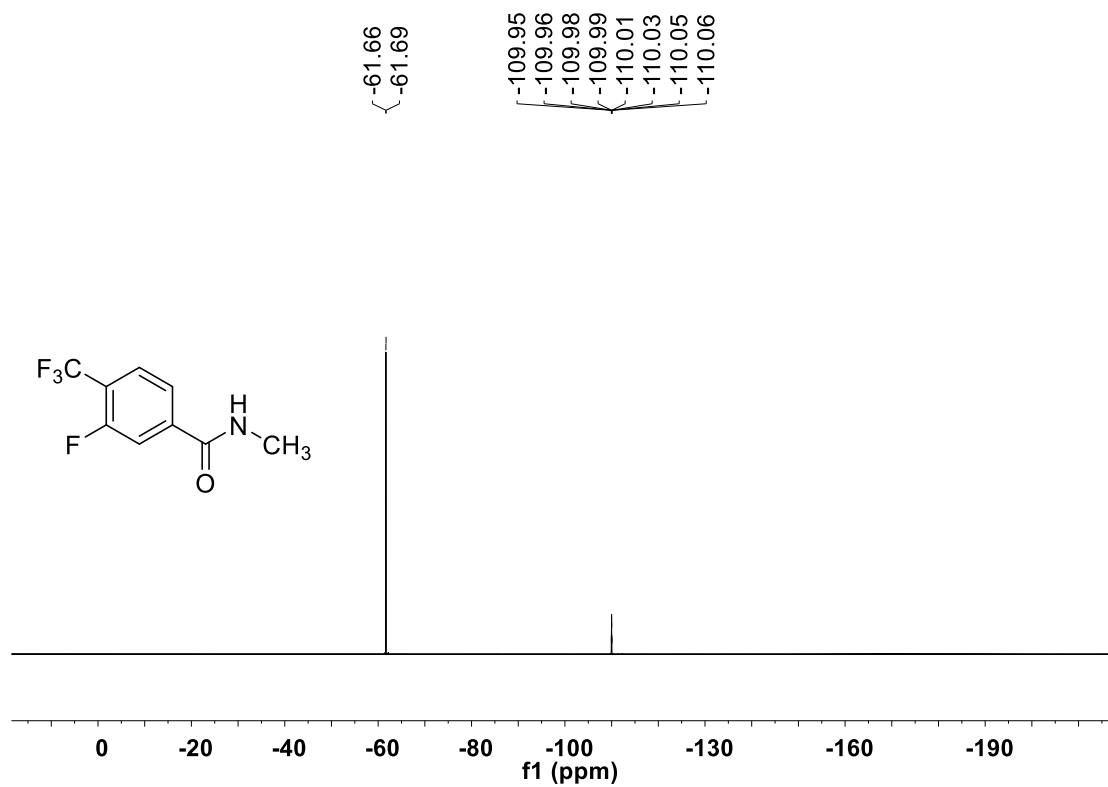

<sup>1</sup>H NMR (400 MHz, CDCl<sub>3</sub>) spectra for compound **1v**

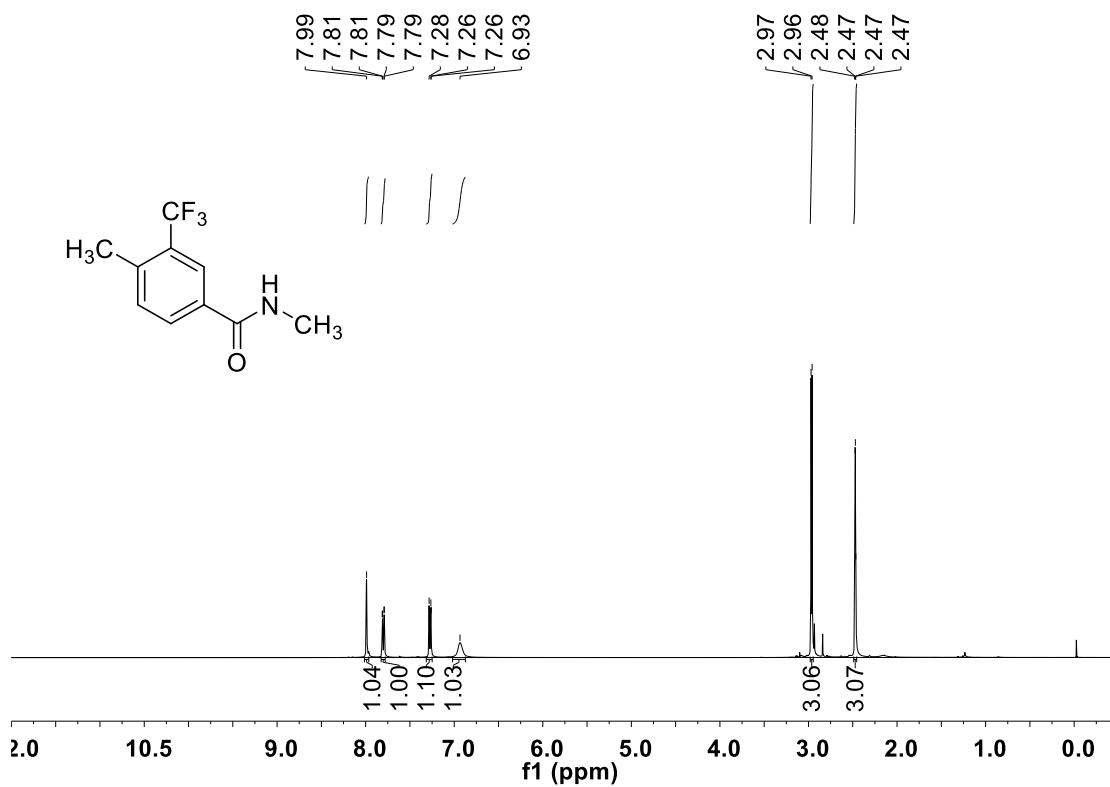

<sup>13</sup>C NMR (126 MHz, CDCl<sub>3</sub>) spectra for compound **1v**

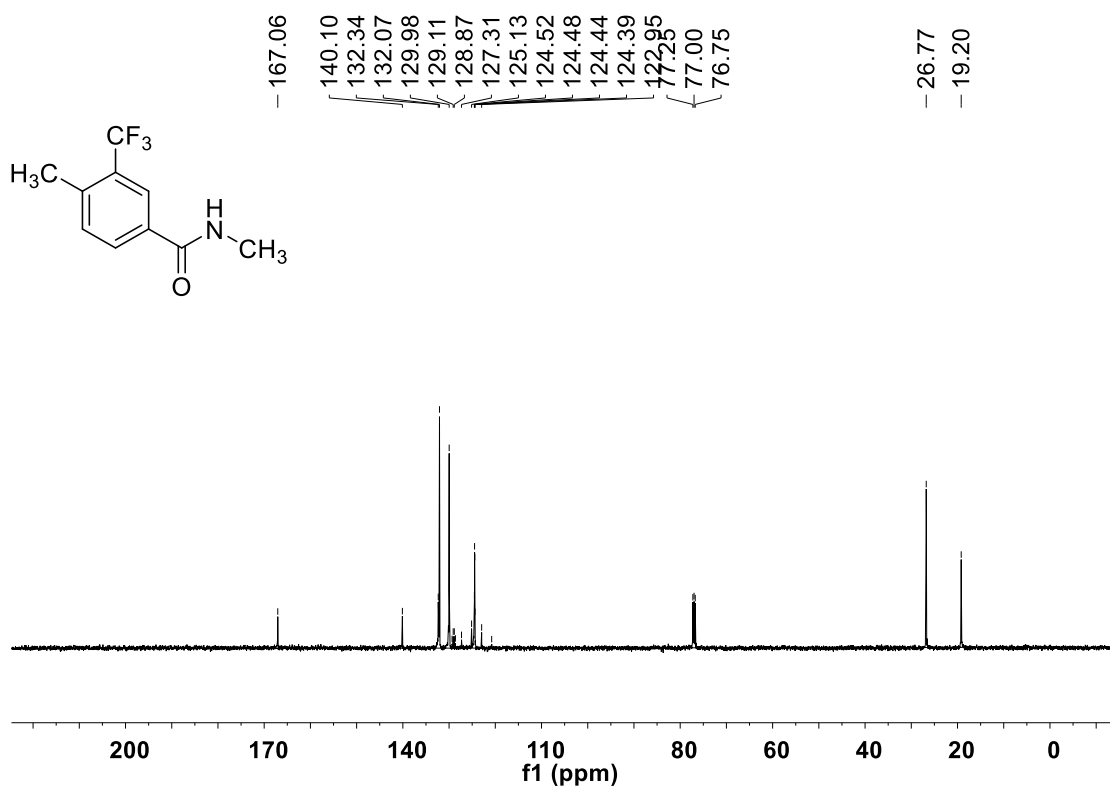

$^{19}\text{F}$  NMR (377 MHz,  $\text{CDCl}_3$ ) spectra for compound **1v**

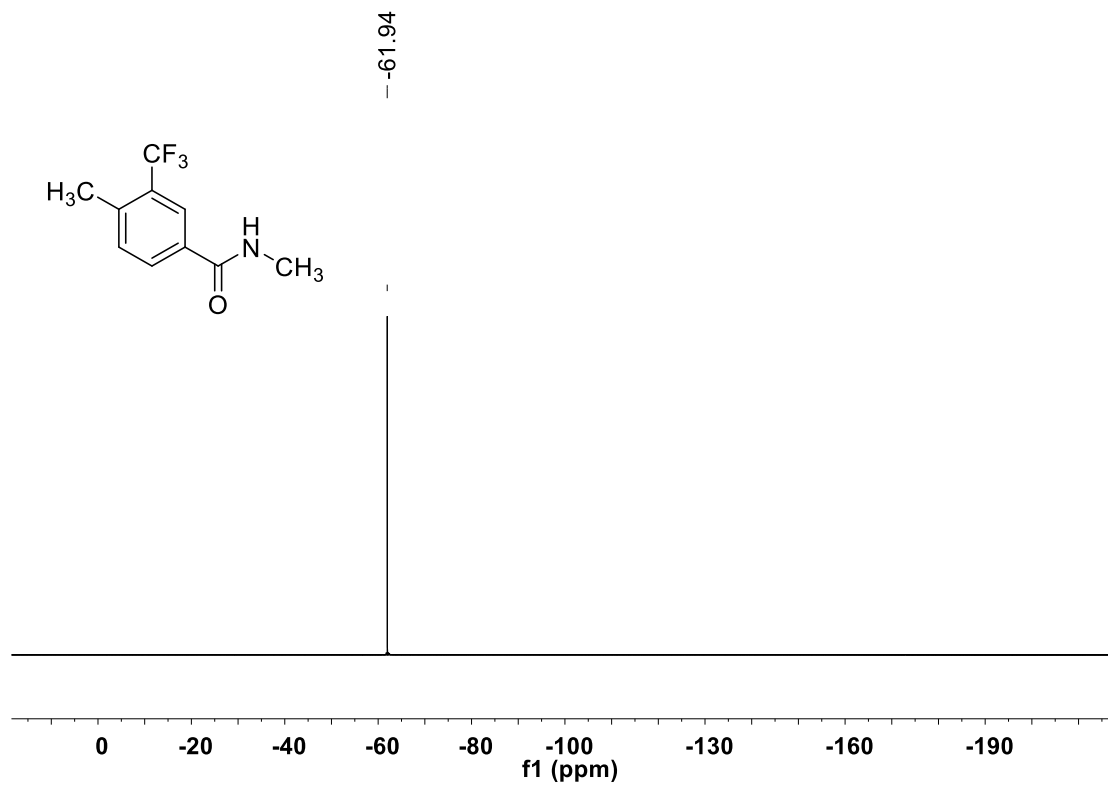

$^1\text{H}$  NMR (400 MHz,  $\text{CDCl}_3$ ) spectra for compound **1w**

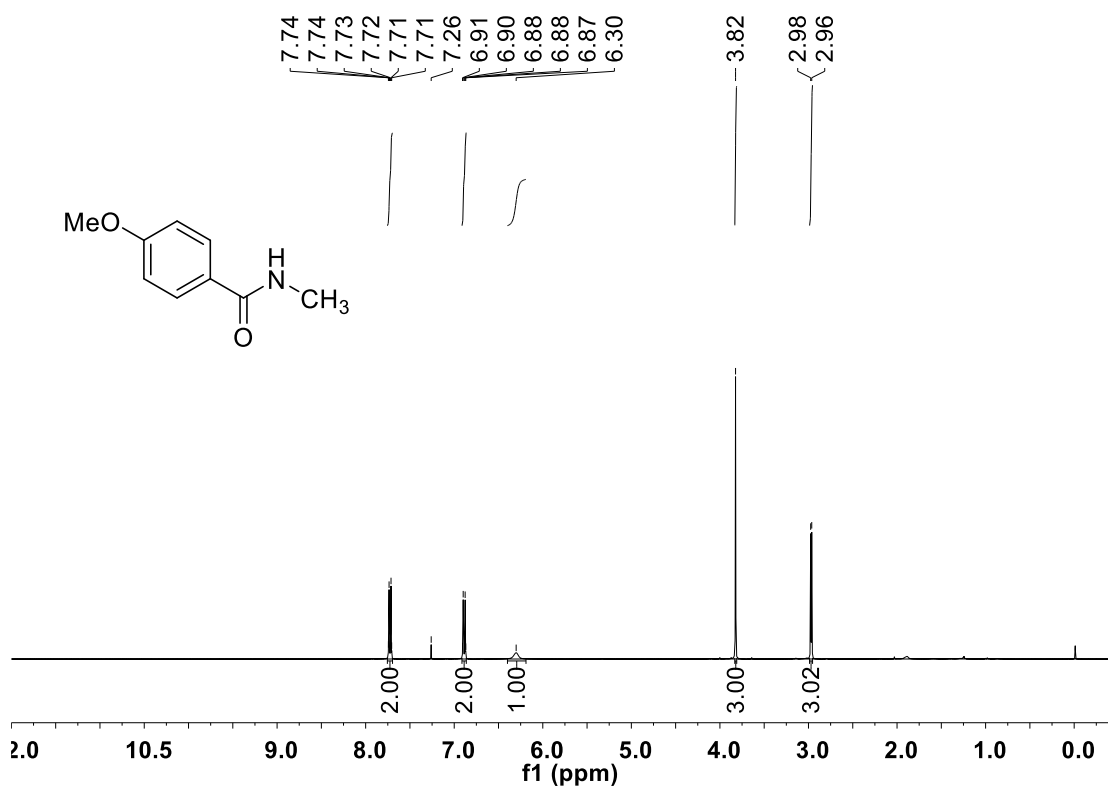

<sup>13</sup>C NMR (126 MHz, CDCl<sub>3</sub>) spectra for compound **1w**

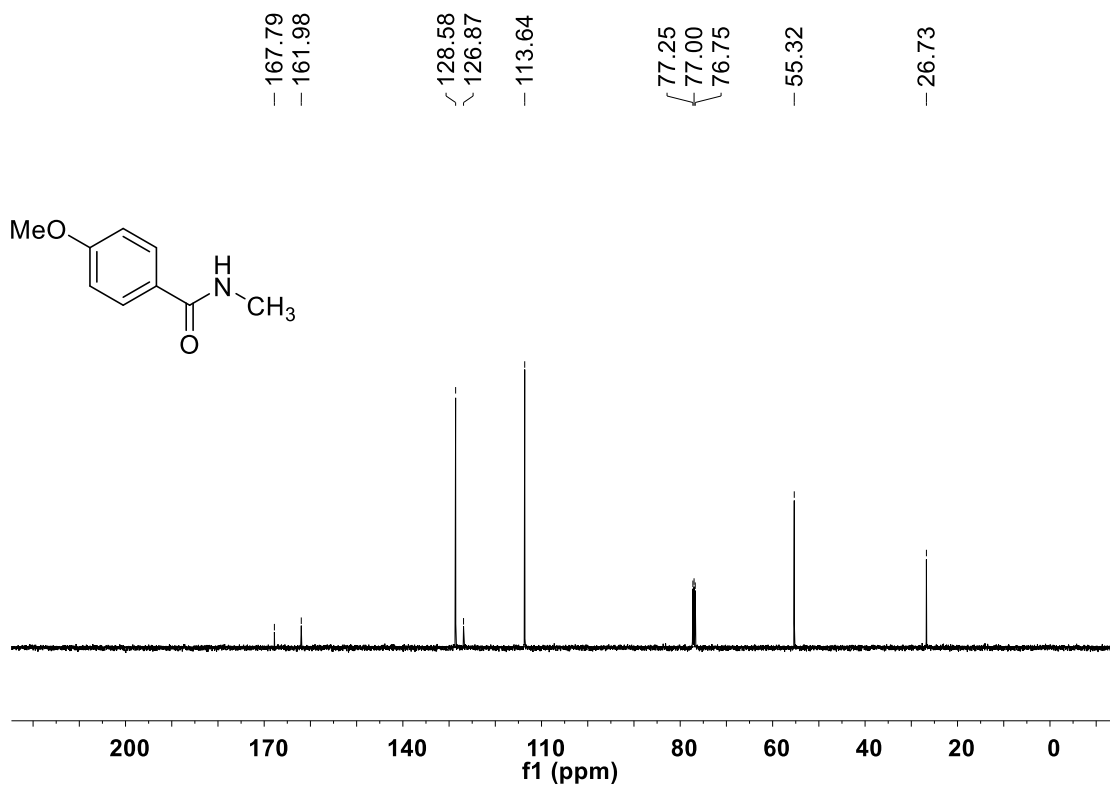

<sup>1</sup>H NMR (400 MHz, CDCl<sub>3</sub>) spectra for compound **1z**

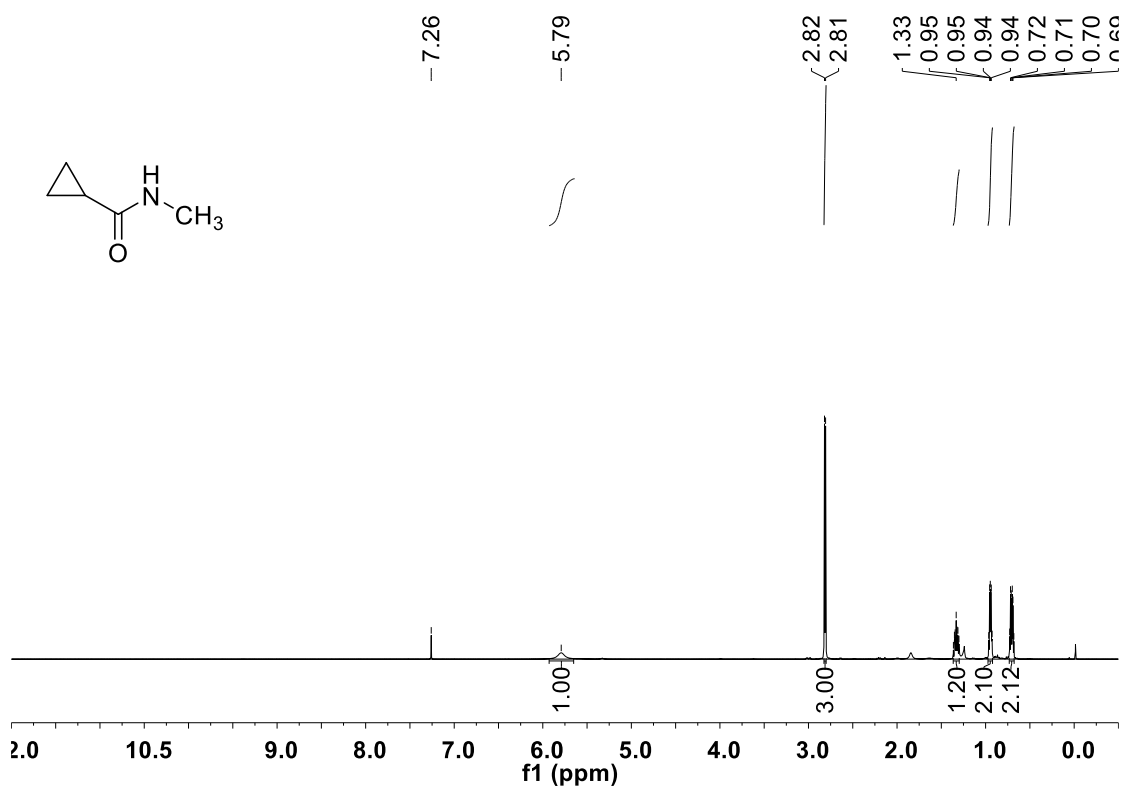

<sup>13</sup>C NMR (126 MHz, CDCl<sub>3</sub>) spectra for compound **1z**

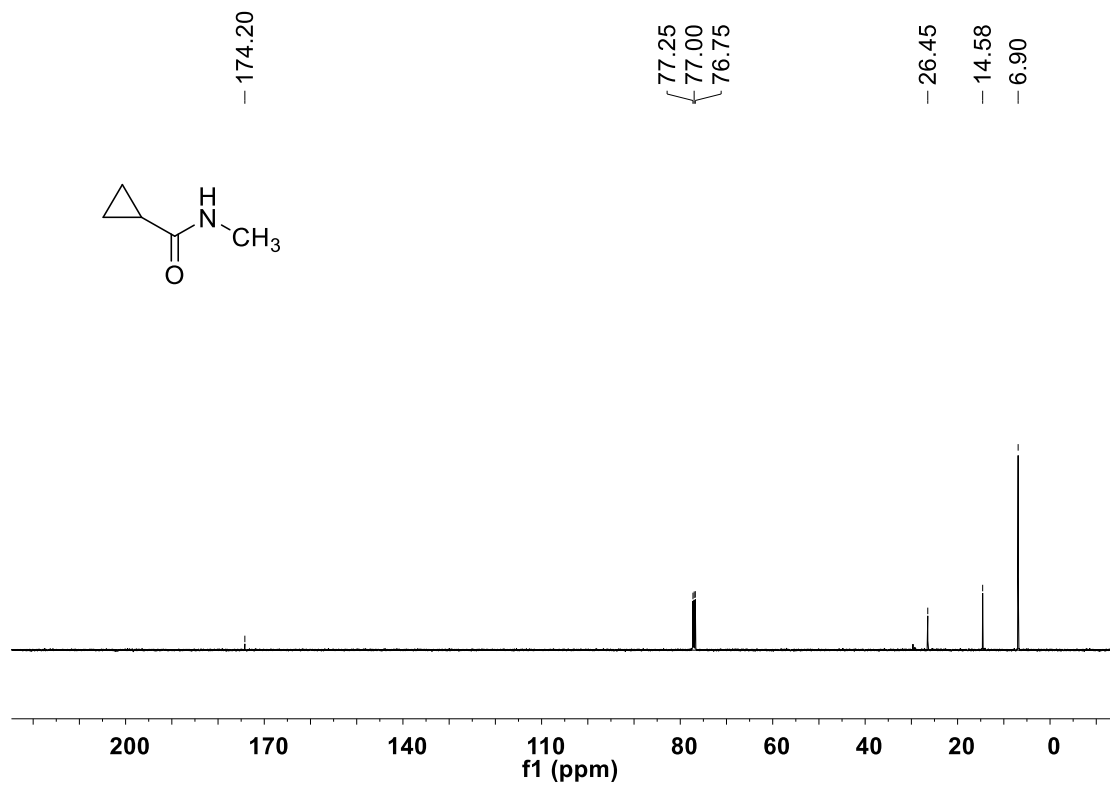

<sup>1</sup>H NMR (400 MHz, CDCl<sub>3</sub>) spectra for compound **1ac**

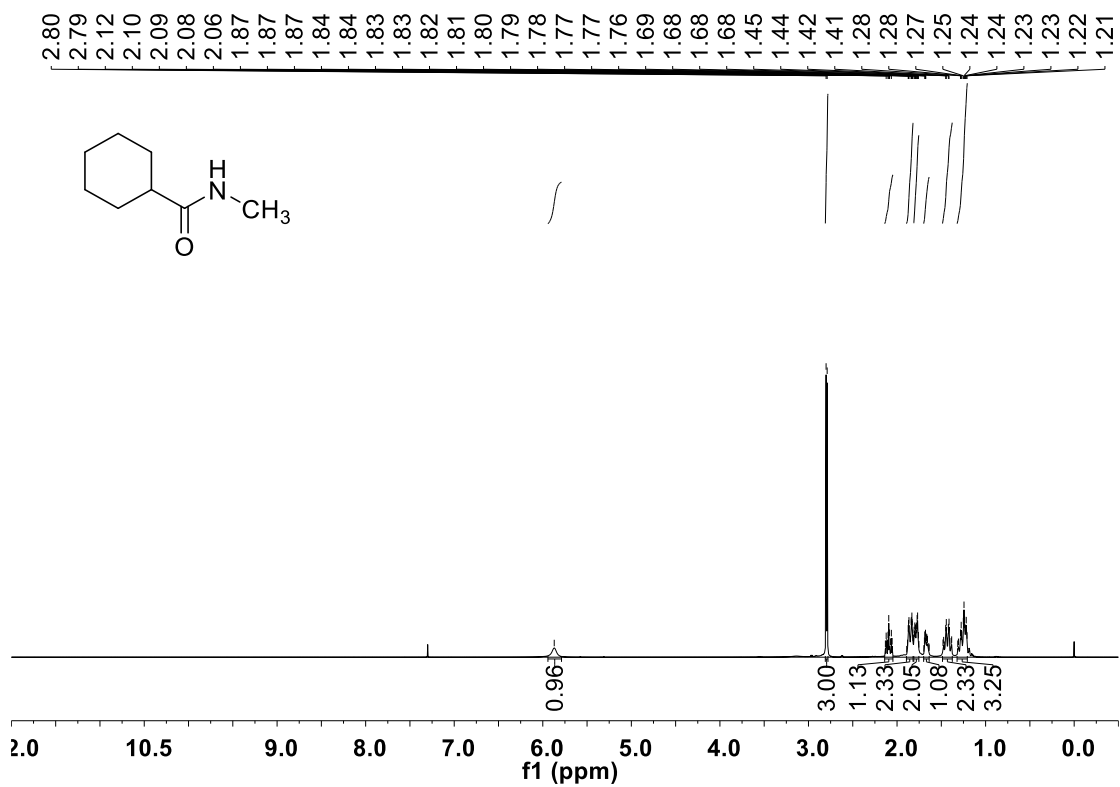

<sup>13</sup>C NMR (126 MHz, CDCl<sub>3</sub>) spectra for compound **1ac**

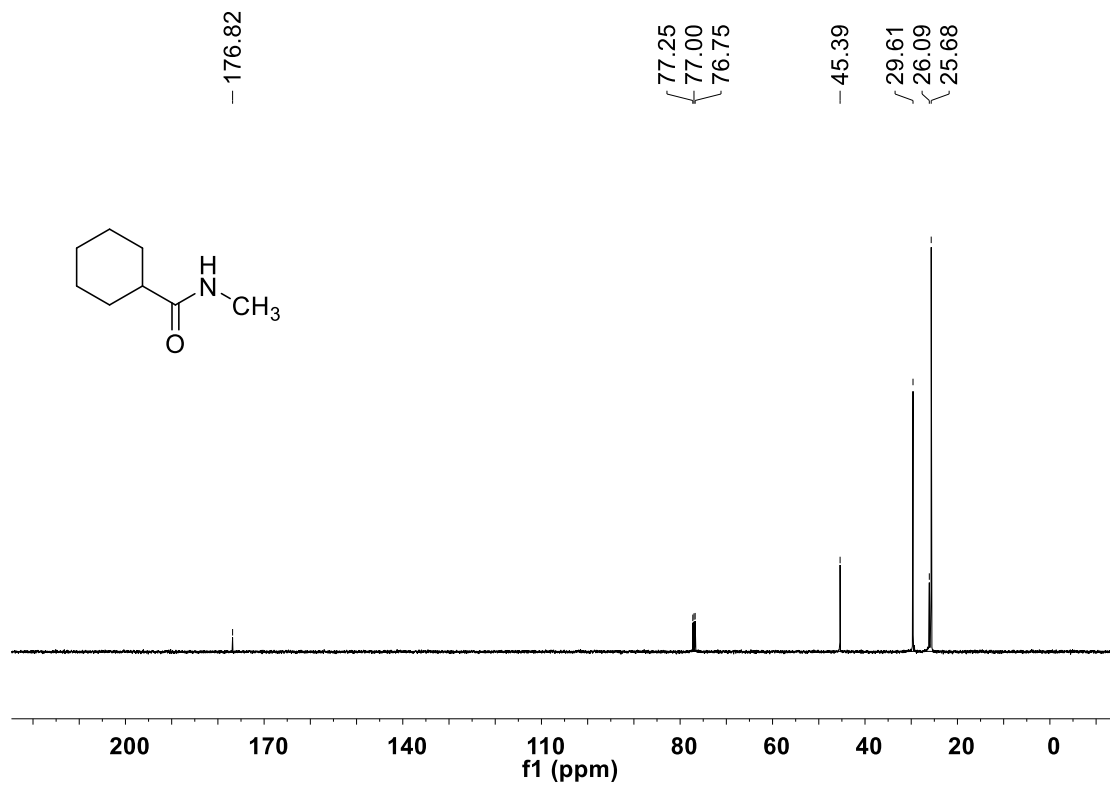

<sup>1</sup>H NMR (400 MHz, CDCl<sub>3</sub>) spectra for compound **1ad**

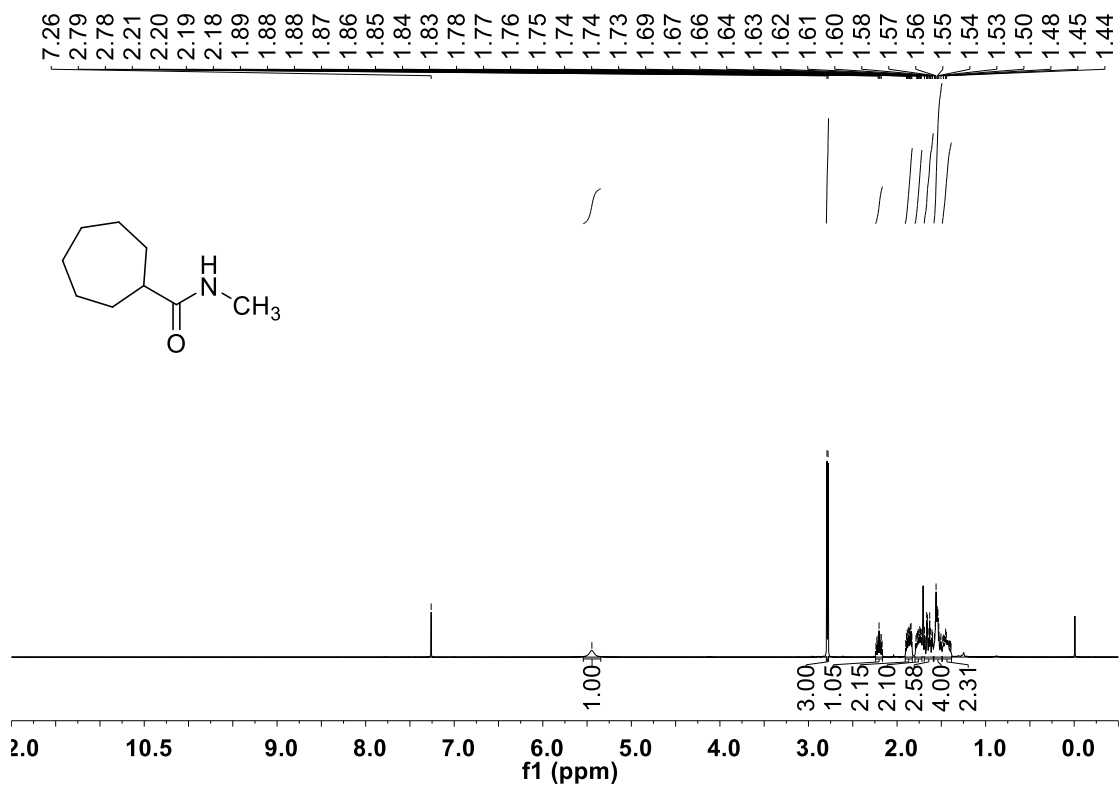

$^{13}\text{C}$  NMR (126 MHz,  $\text{CDCl}_3$ ) spectra for compound **1ad**

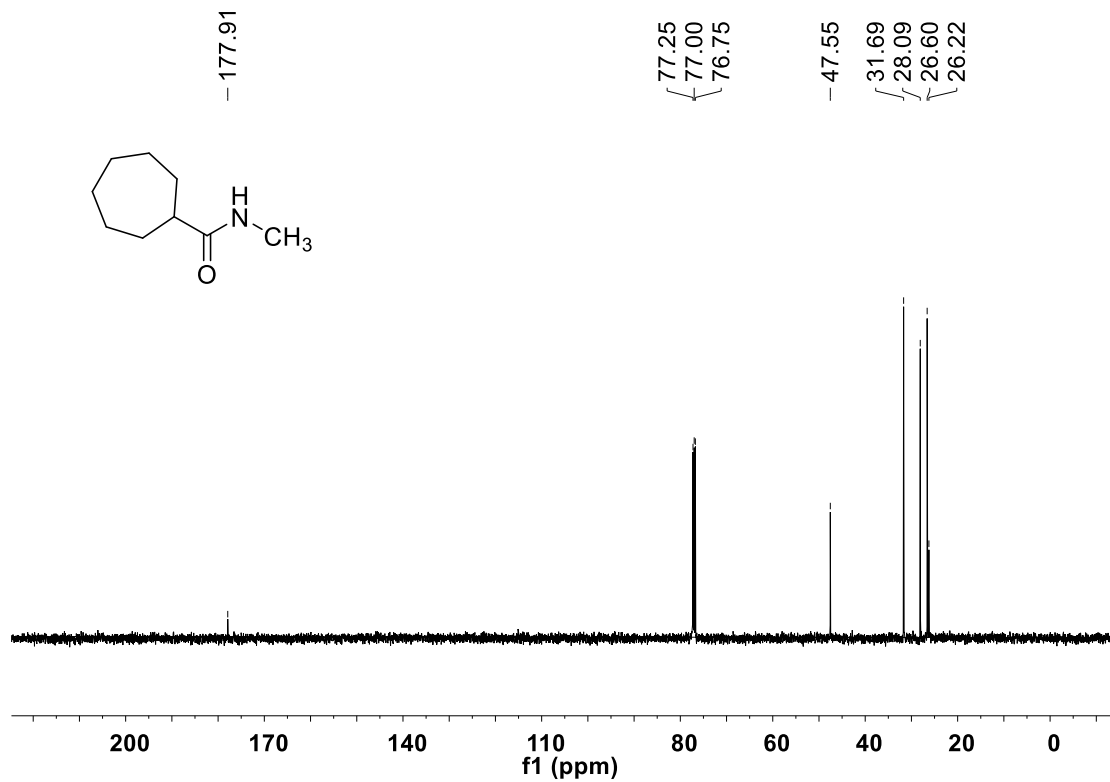

$^1\text{H}$  NMR (400 MHz,  $\text{CDCl}_3$ ) spectra for compound **1ae**

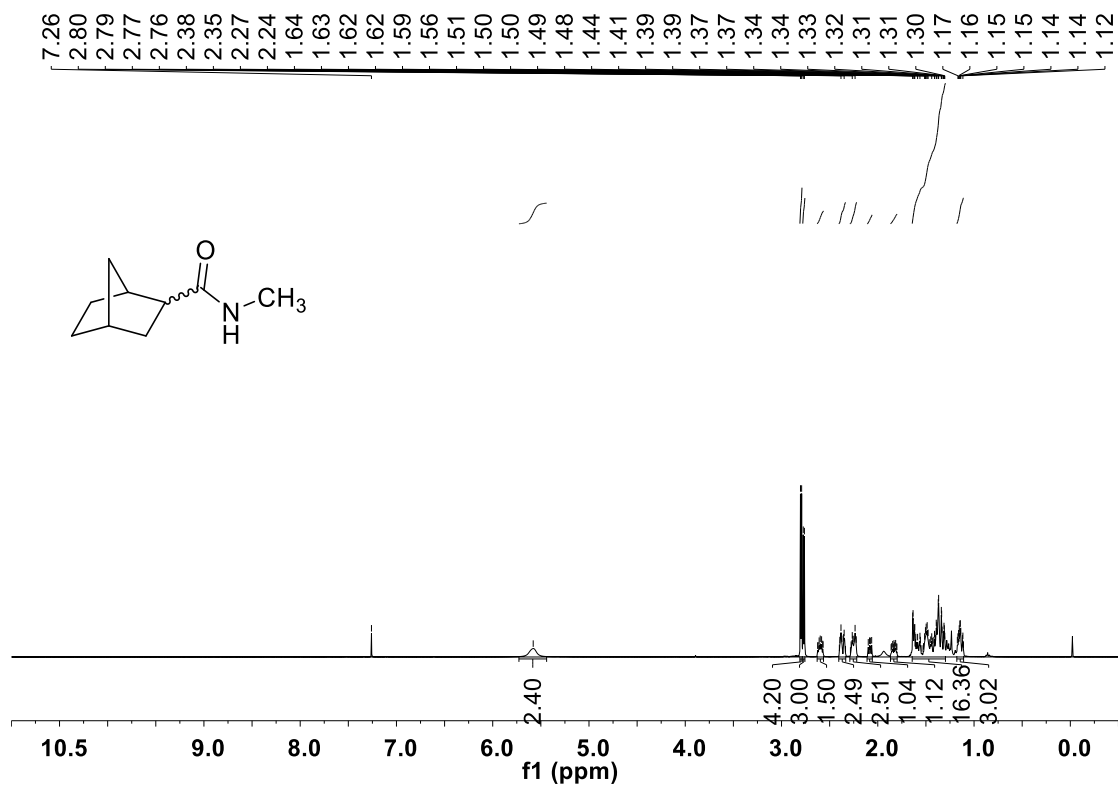

<sup>13</sup>C NMR (126 MHz, CDCl<sub>3</sub>) spectra for compound **1ae**

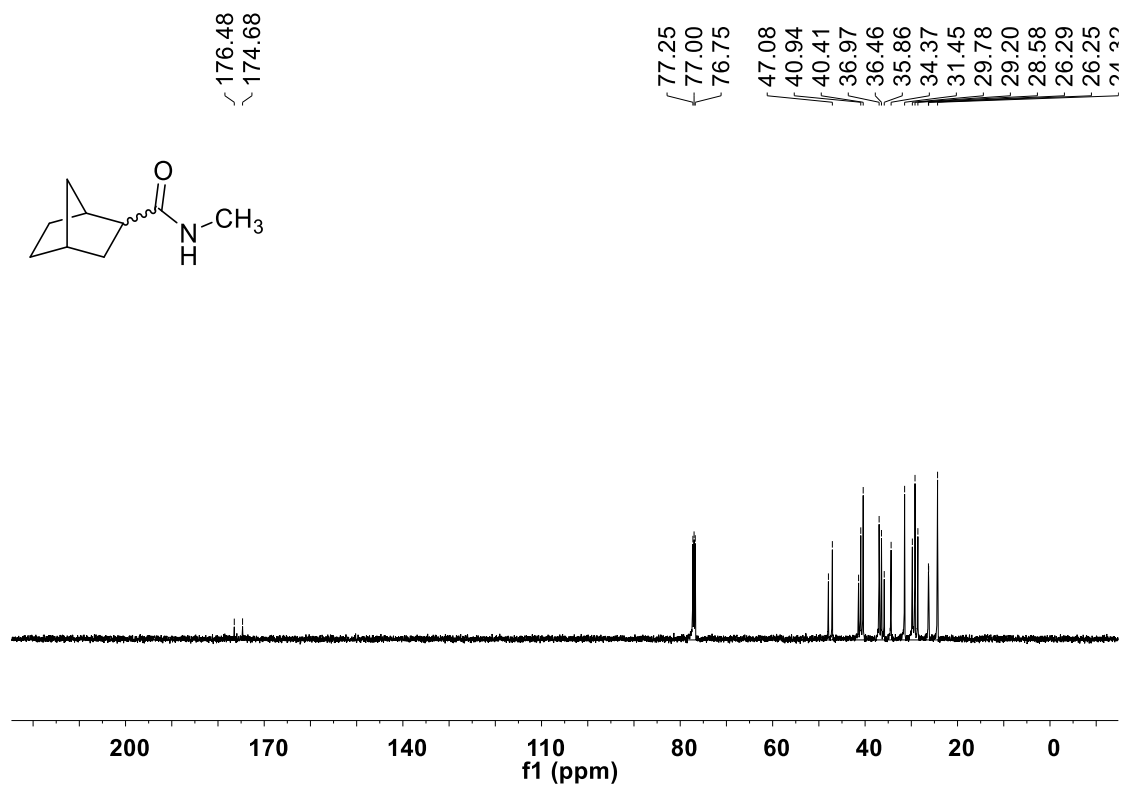

<sup>1</sup>H NMR (400 MHz, CDCl<sub>3</sub>) spectra for compound **1af**

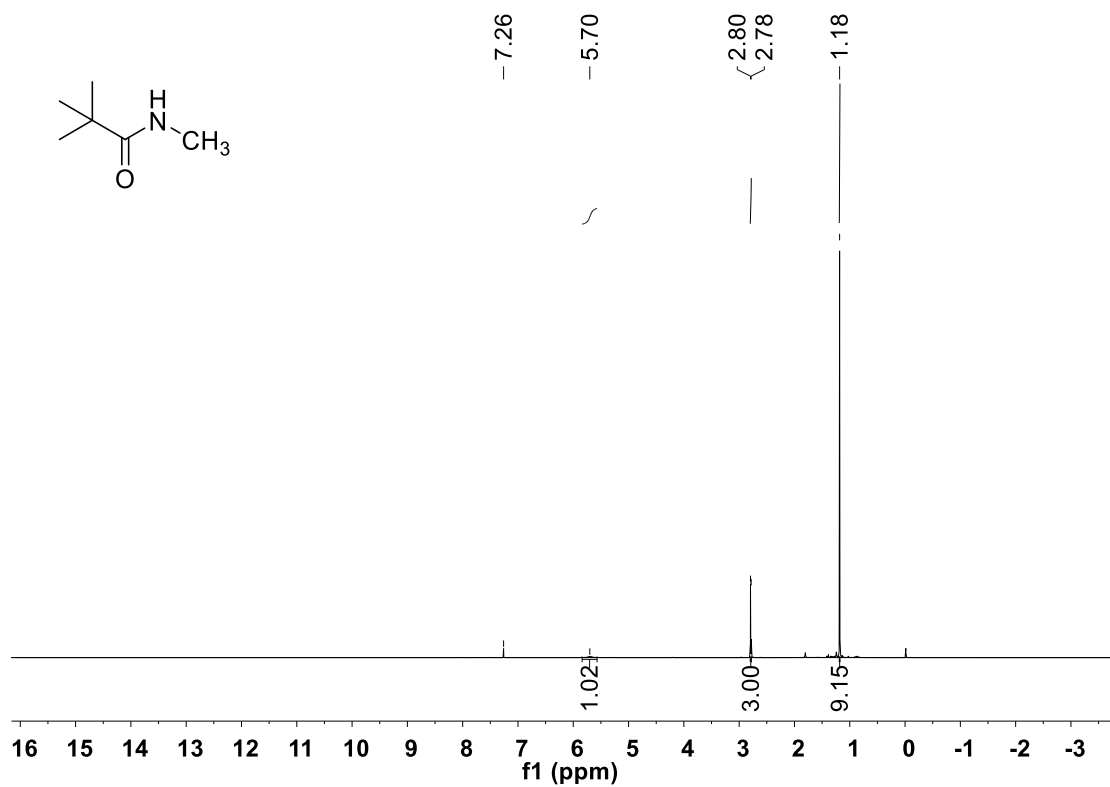



<sup>13</sup>C NMR (126 MHz, CDCl<sub>3</sub>) spectra for compound **1af**

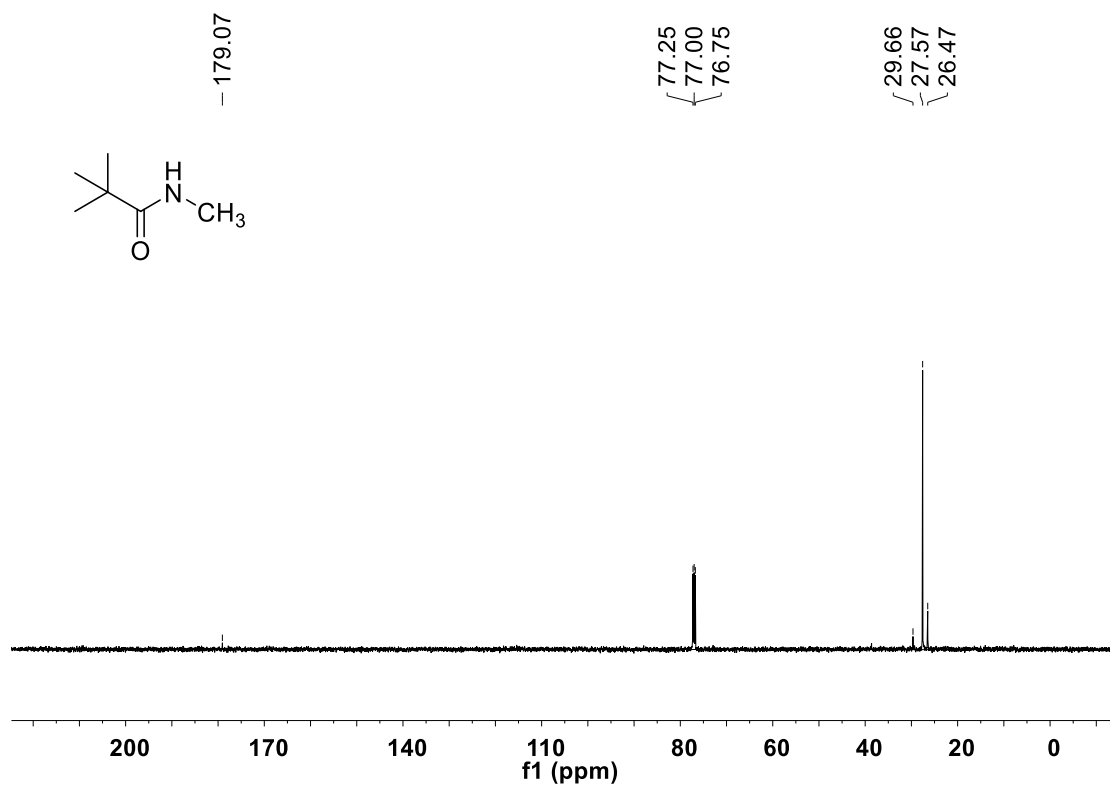

<sup>1</sup>H NMR (400 MHz, CDCl<sub>3</sub>) spectra for compound **1ah**

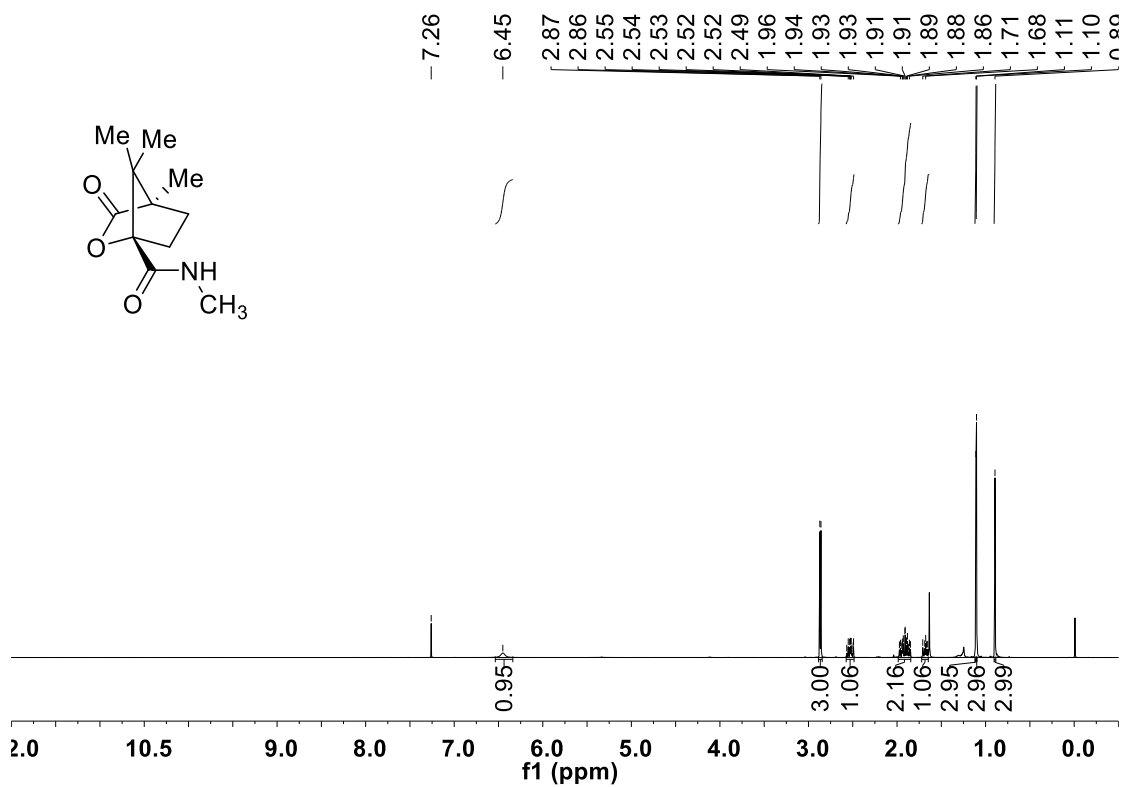

<sup>13</sup>C NMR (126 MHz, CDCl<sub>3</sub>) spectra for compound **1ah**

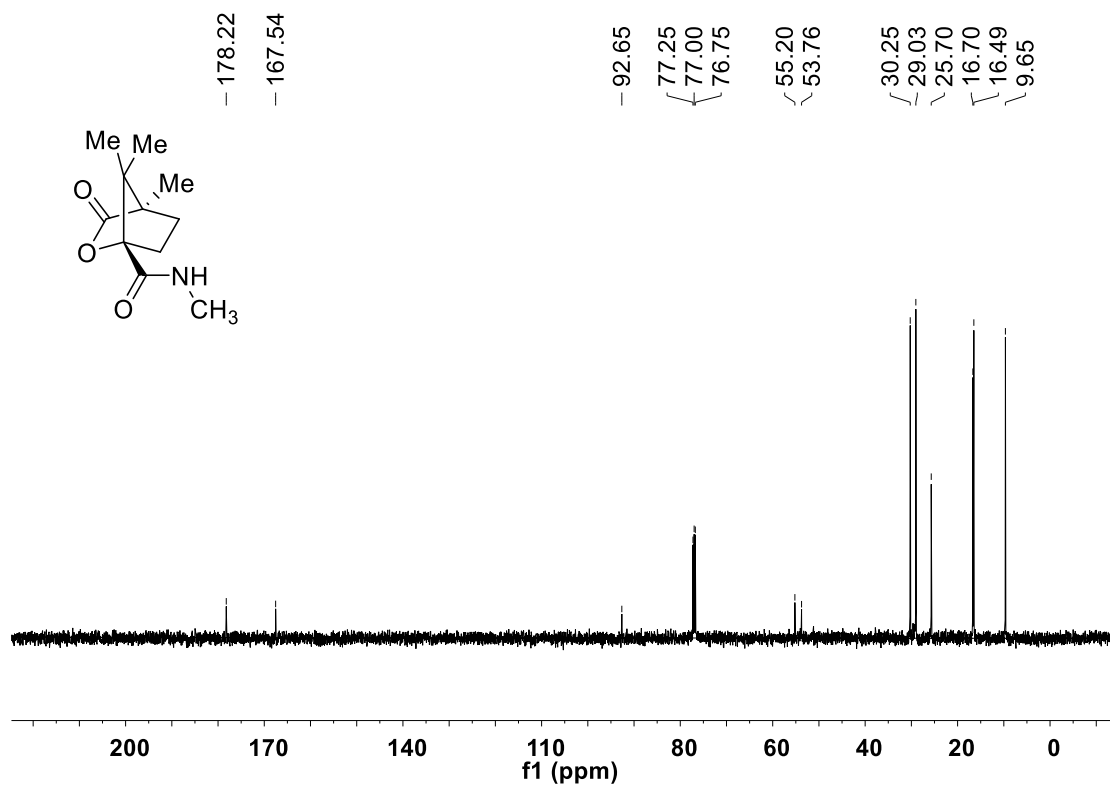

<sup>1</sup>H NMR (400 MHz, CDCl<sub>3</sub>) spectra for compound **1aj**

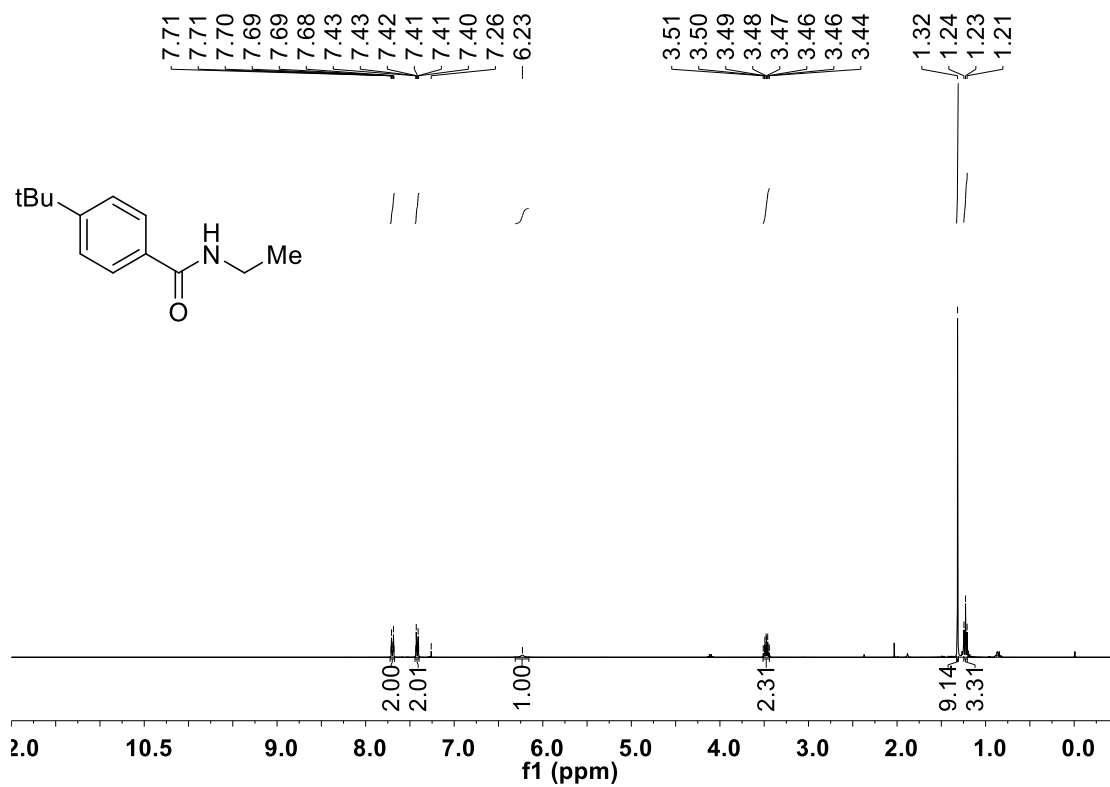

<sup>13</sup>C NMR (126 MHz, CDCl<sub>3</sub>) spectra for compound **1aj**

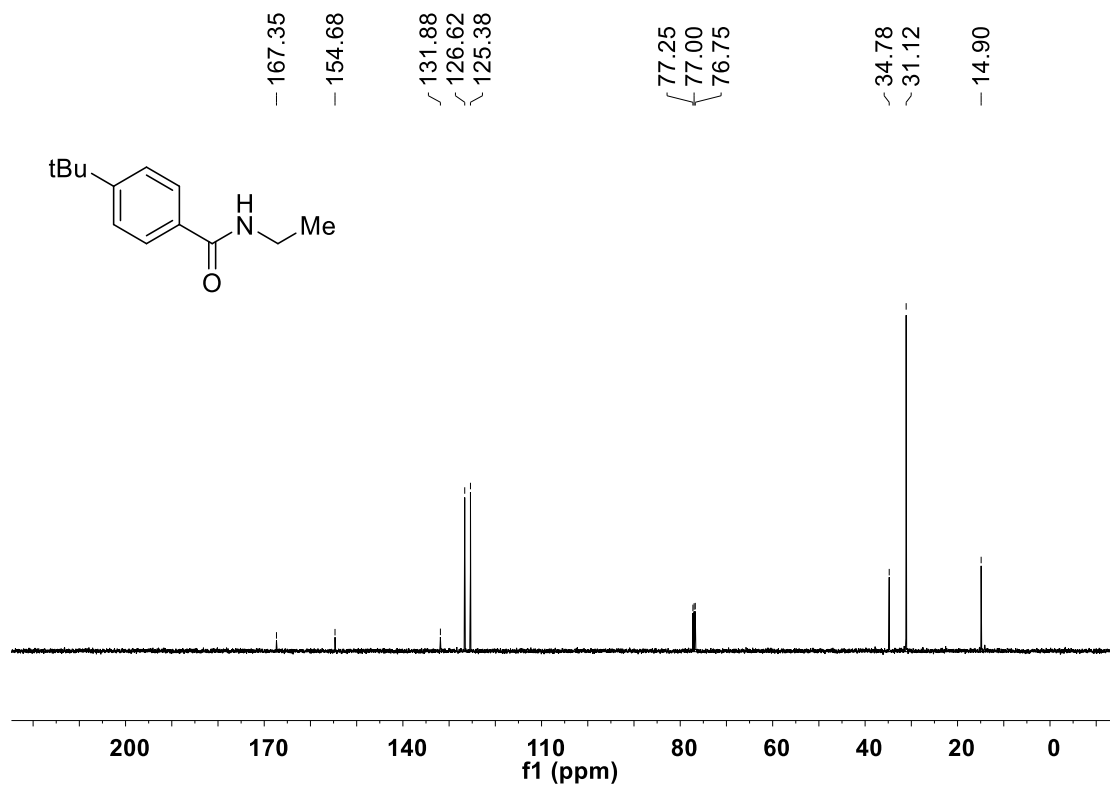

<sup>1</sup>H NMR (400 MHz, CDCl<sub>3</sub>) spectra for compound **1am**

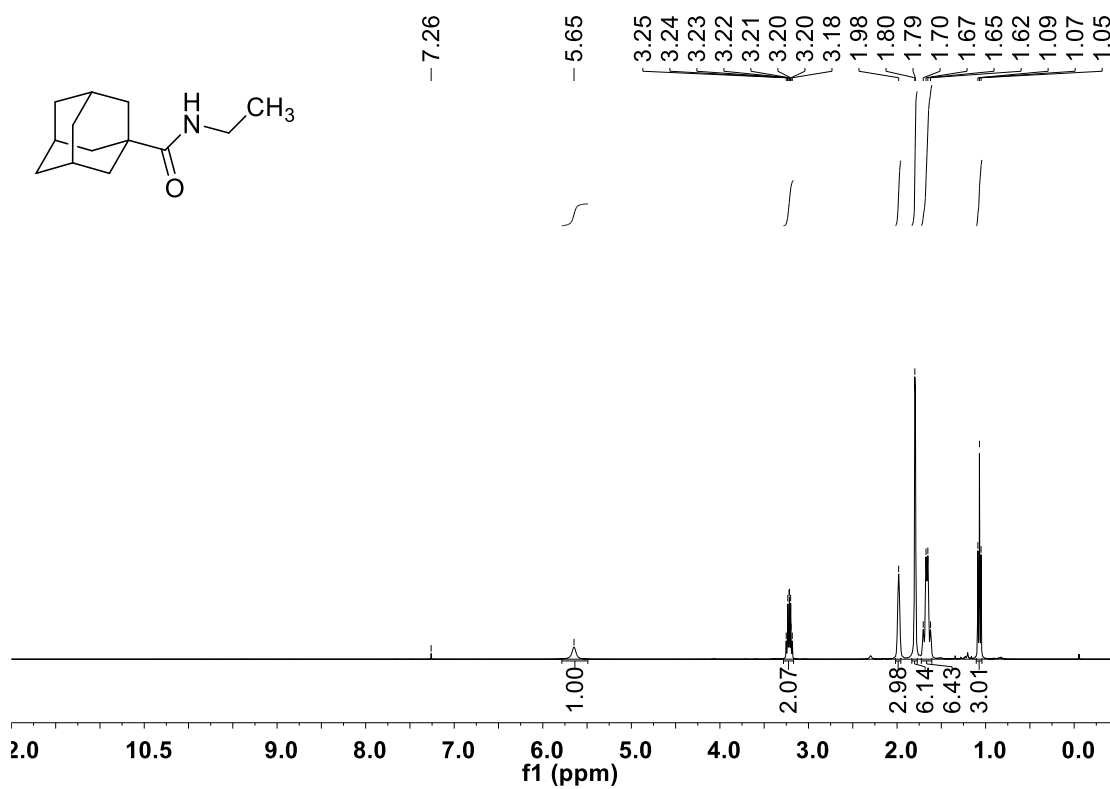

<sup>13</sup>C NMR (126 MHz, CDCl<sub>3</sub>) spectra for compound **1am**

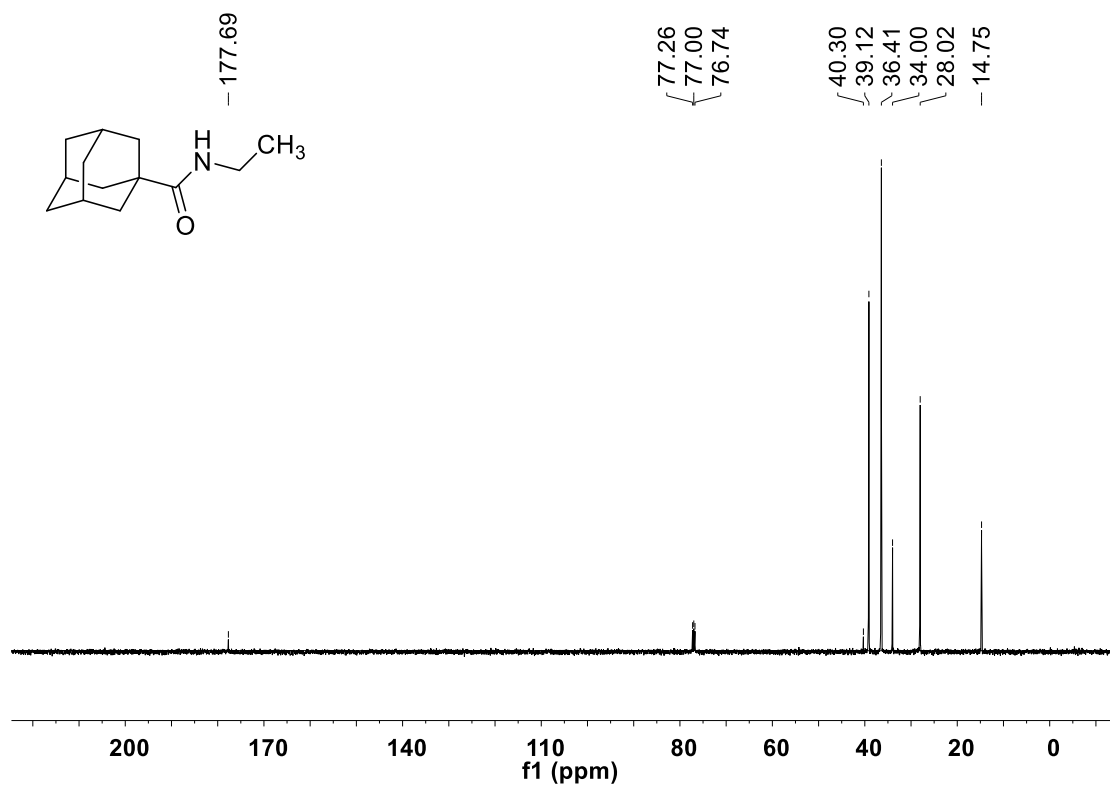

<sup>1</sup>H NMR (400 MHz, CDCl<sub>3</sub>) spectra for compound **1an**

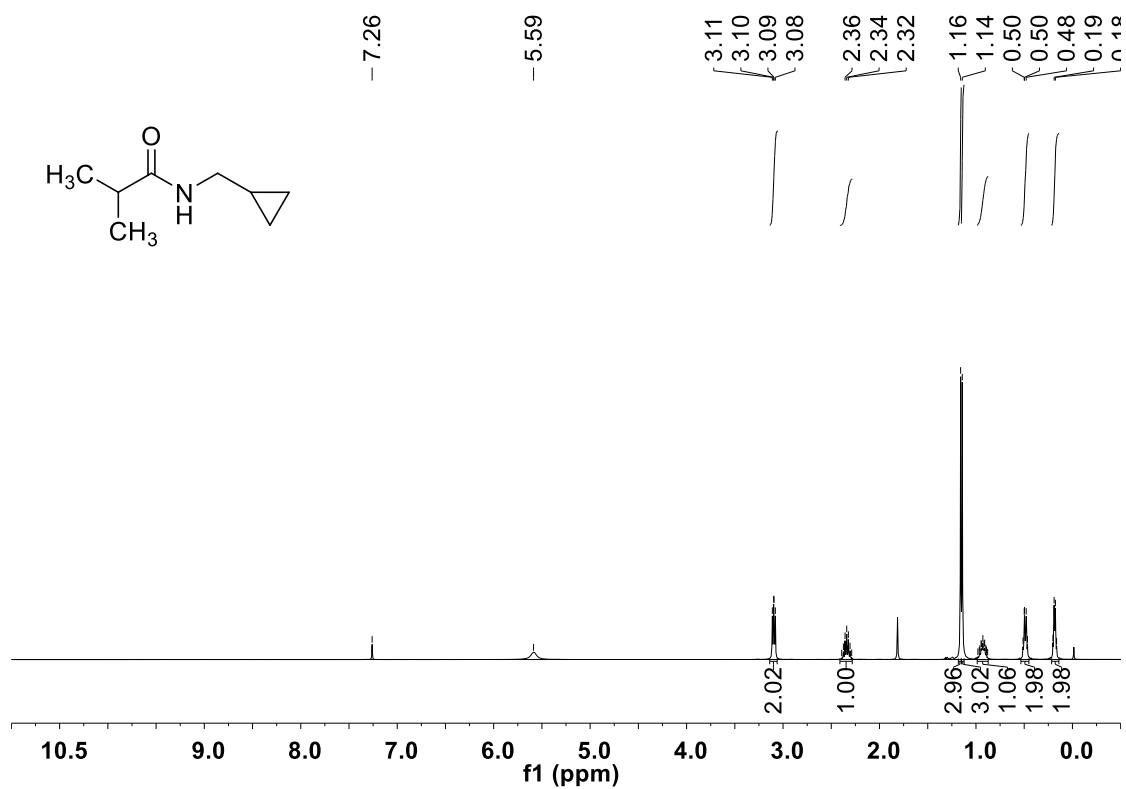

<sup>13</sup>C NMR (126 MHz, CDCl<sub>3</sub>) spectra for compound **1an**

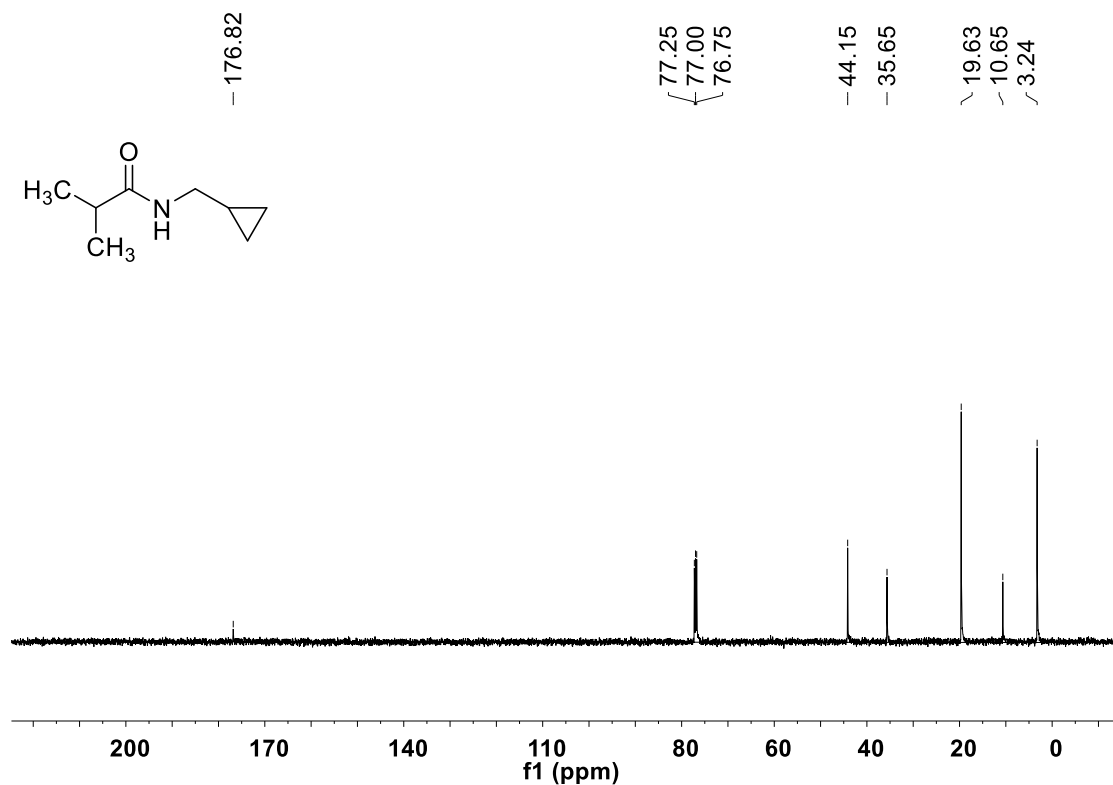

<sup>1</sup>H NMR (400 MHz, CDCl<sub>3</sub>) spectra for compound **2a**

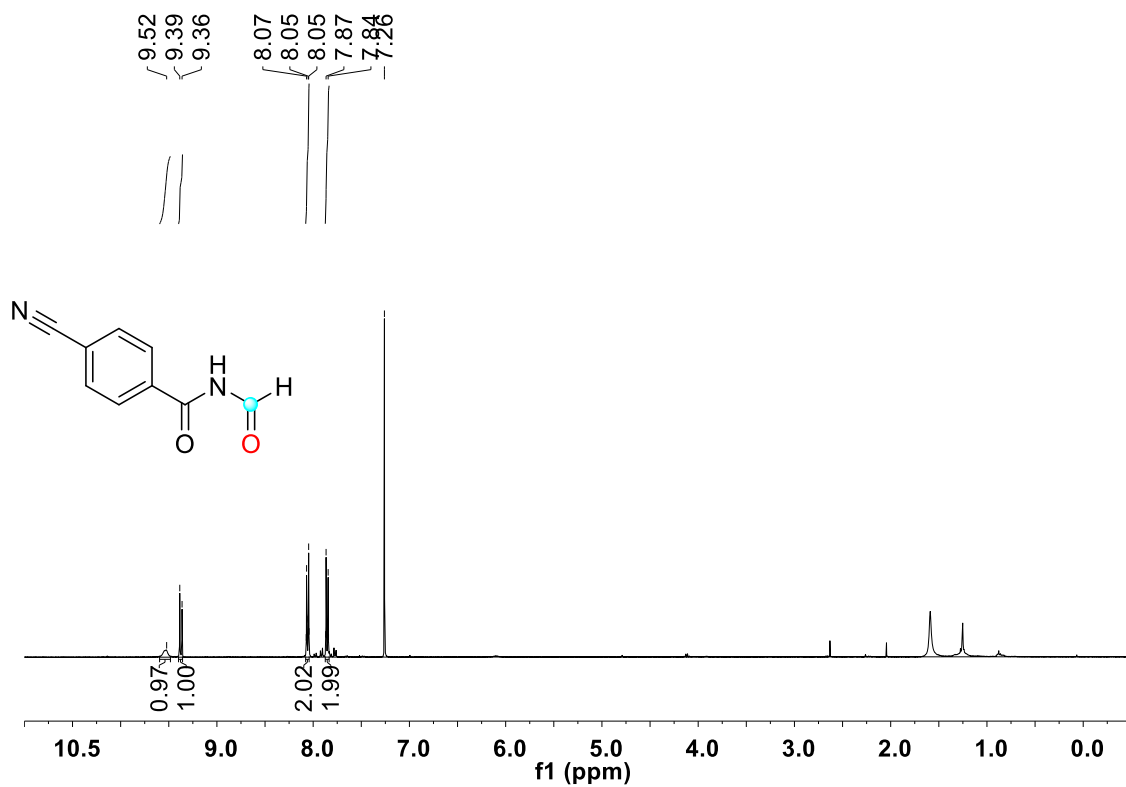

<sup>13</sup>C NMR (126 MHz, CDCl<sub>3</sub>) spectra for compound **2a**

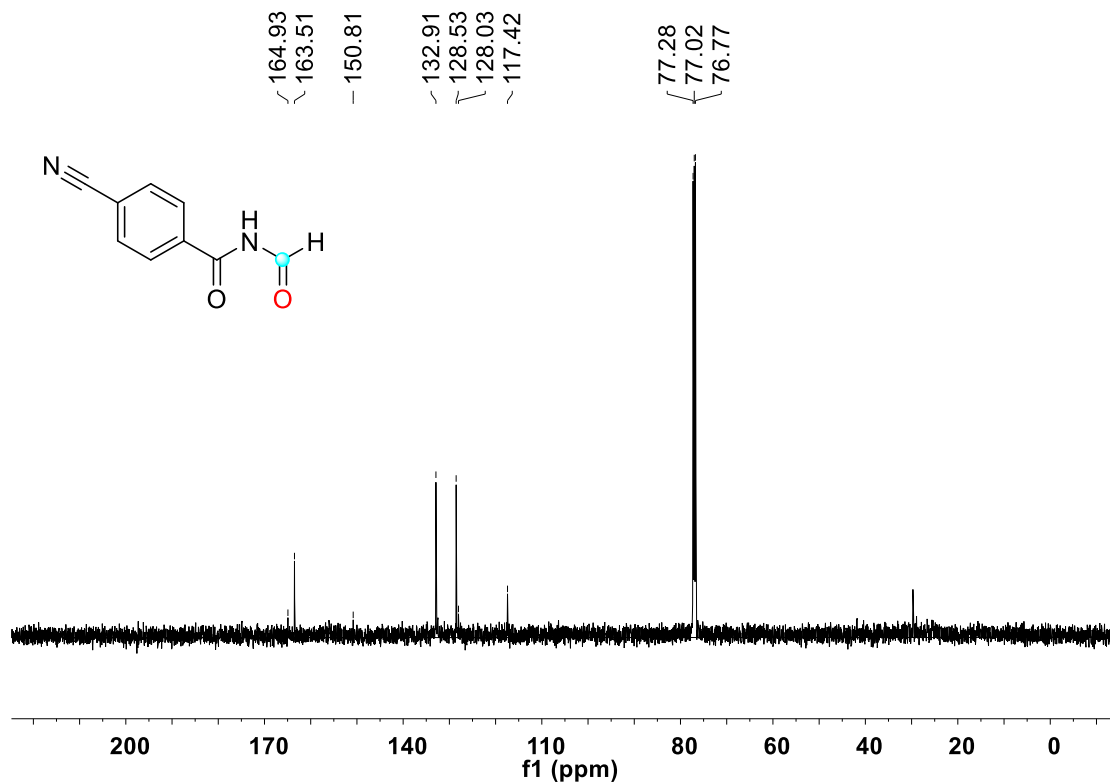

<sup>1</sup>H NMR (400 MHz, CDCl<sub>3</sub>) spectra for compound **2b**

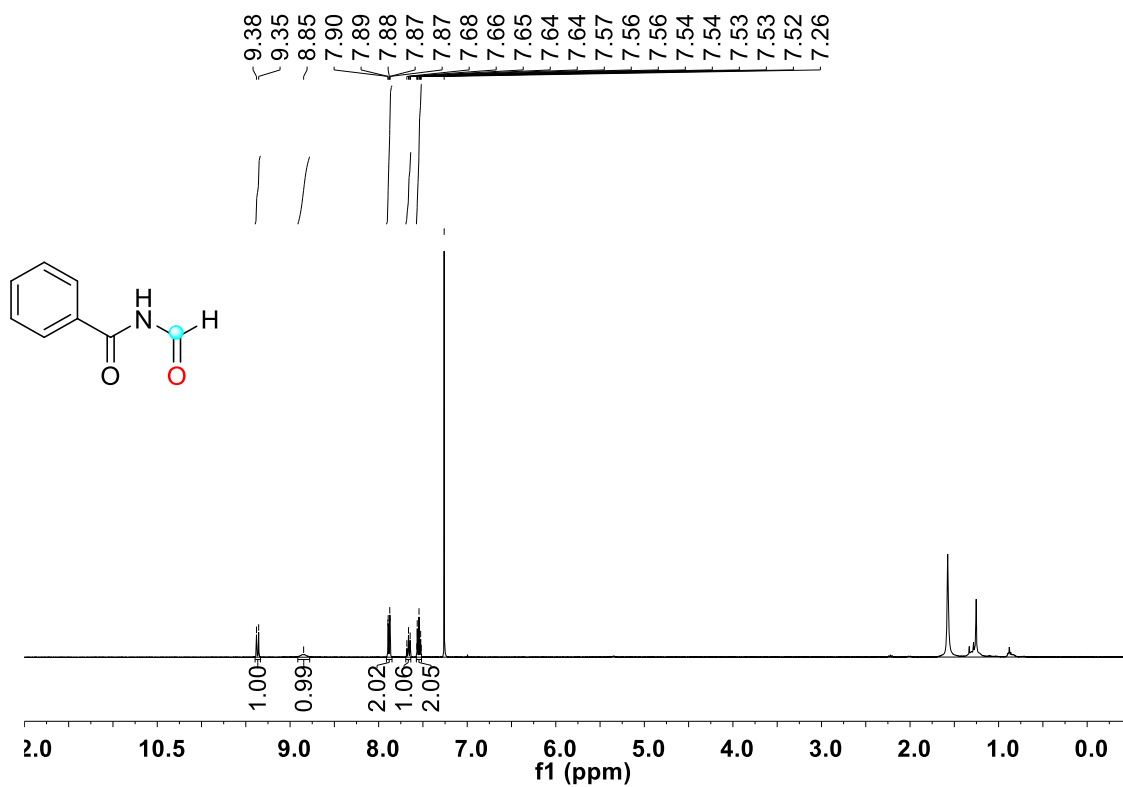

<sup>1</sup>H NMR (400 MHz, CDCl<sub>3</sub>) spectra for compound **2c**

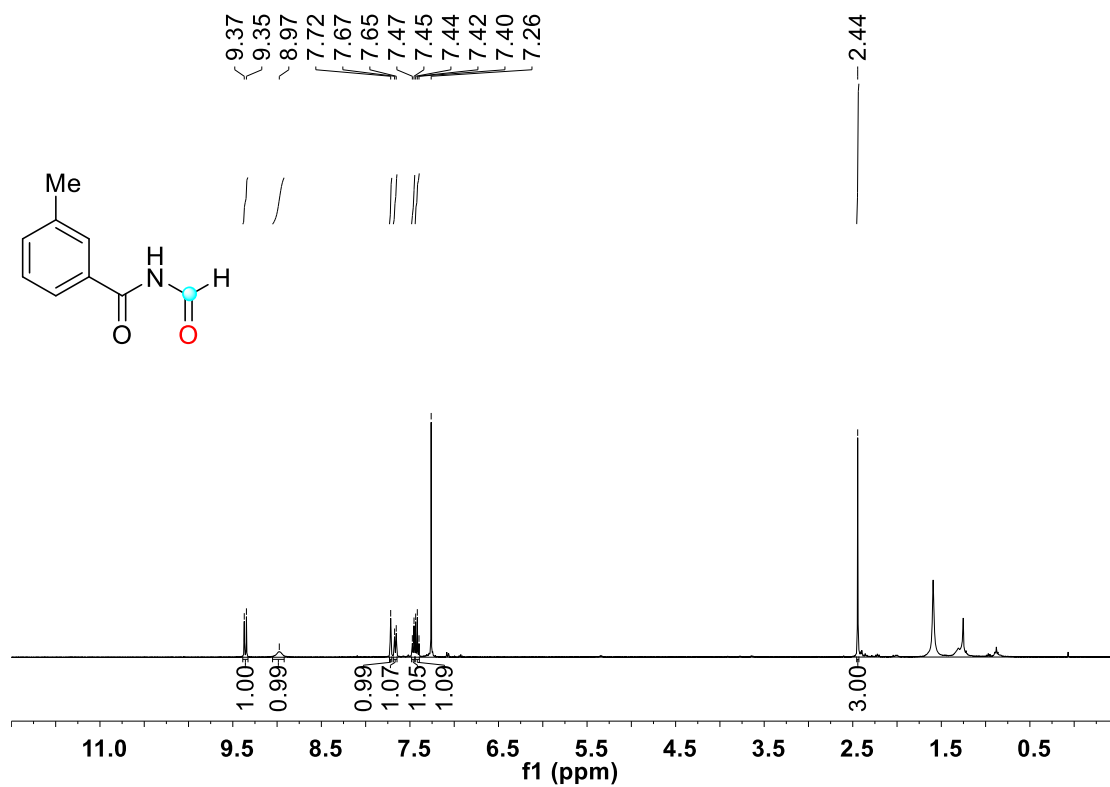

<sup>1</sup>H NMR (400 MHz, CDCl<sub>3</sub>) spectra for compound **2d**

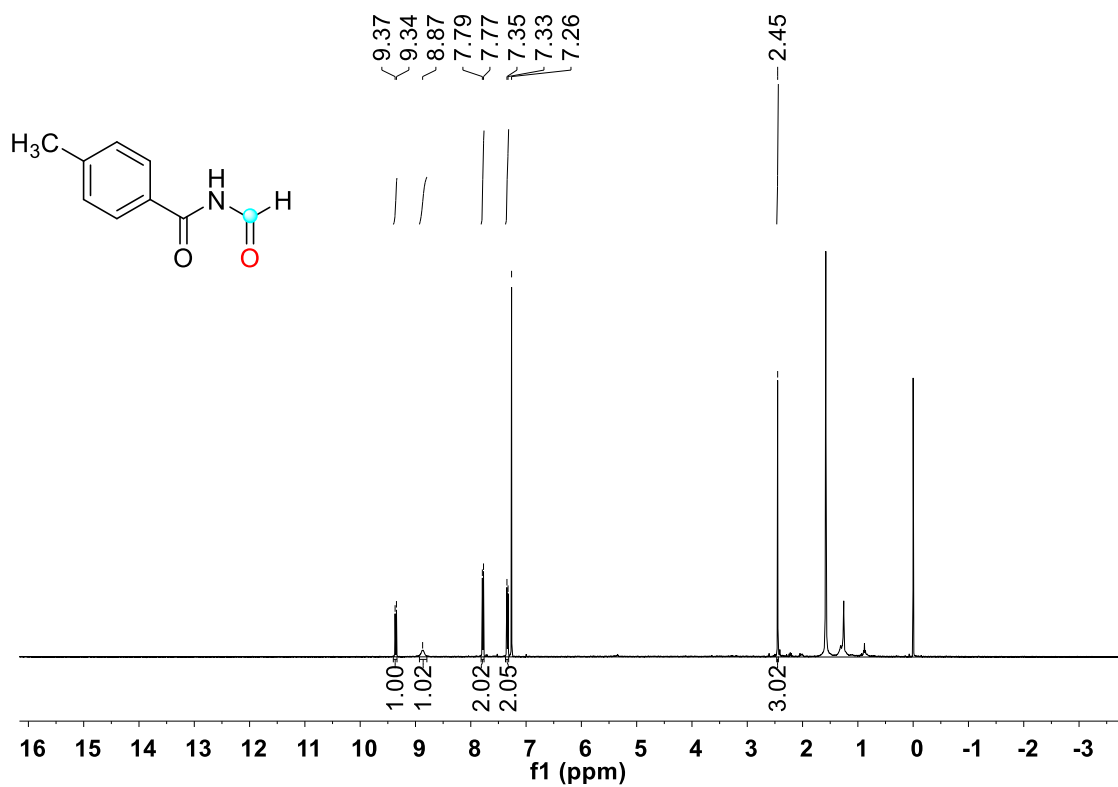

<sup>1</sup>H NMR (400 MHz, CDCl<sub>3</sub>) spectra for compound **2e**

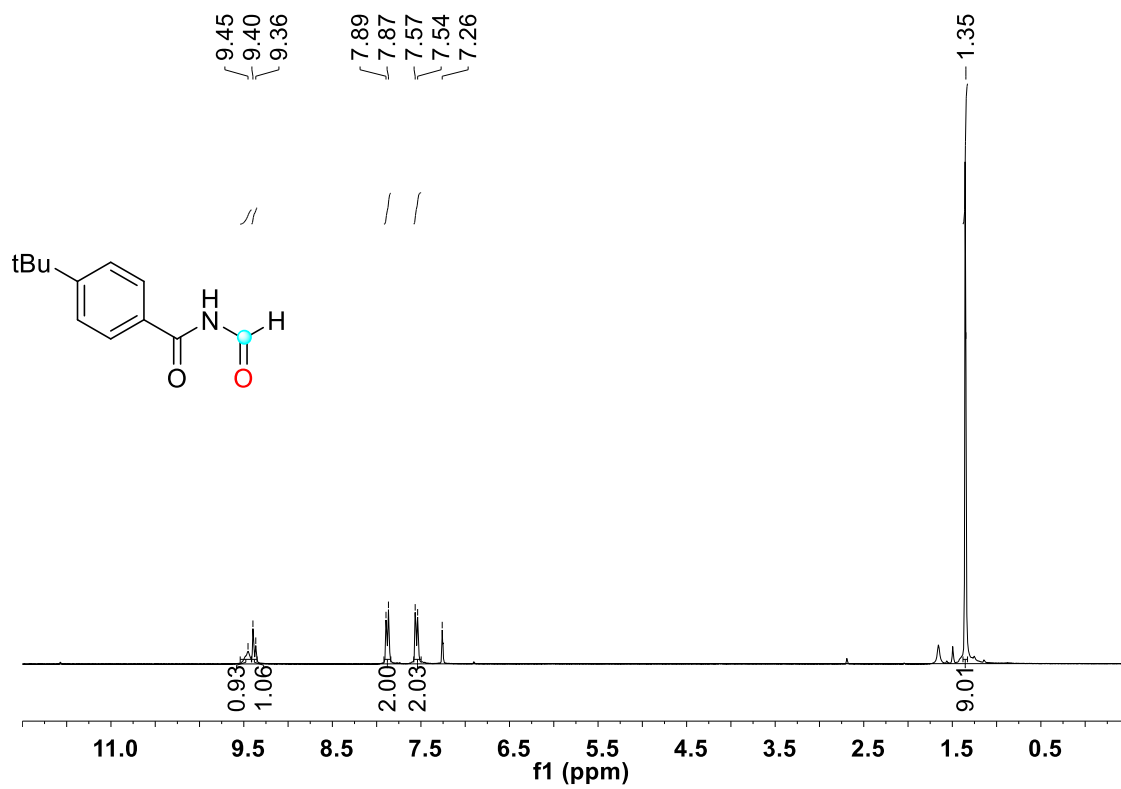

<sup>13</sup>C NMR (126 MHz, CDCl<sub>3</sub>) spectra for compound **2e**

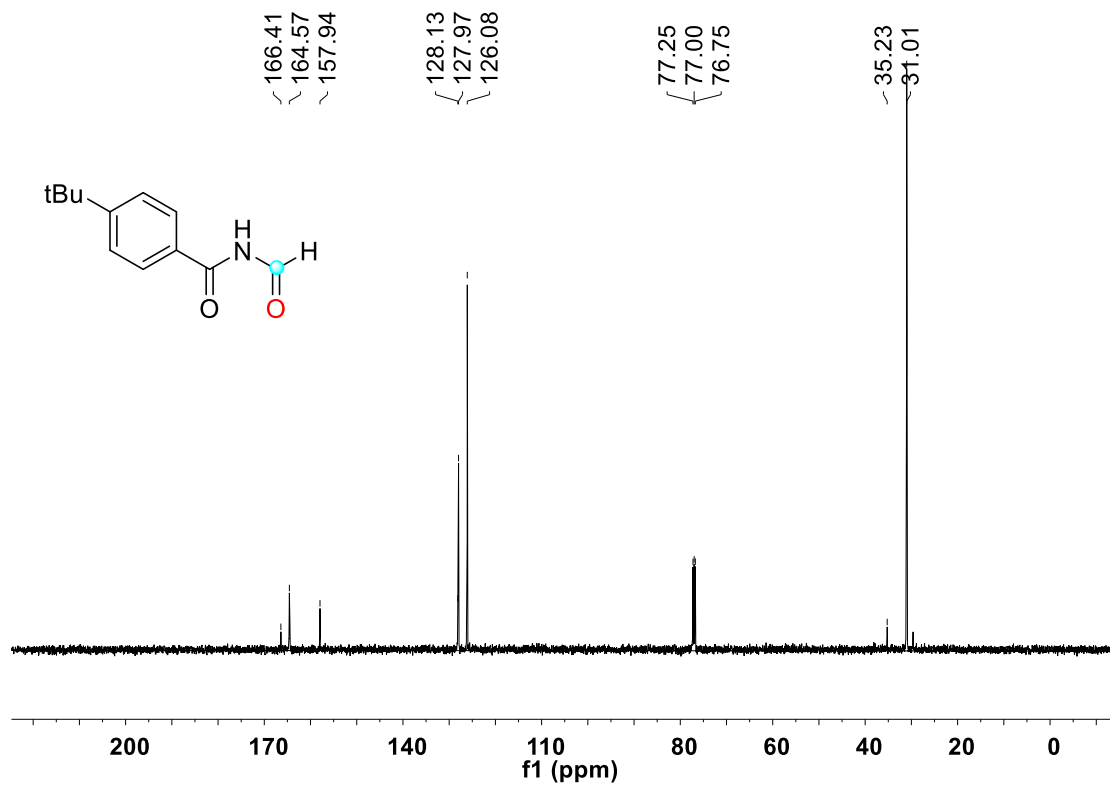



<sup>1</sup>H NMR (400 MHz, CDCl<sub>3</sub>) spectra for compound **2f**

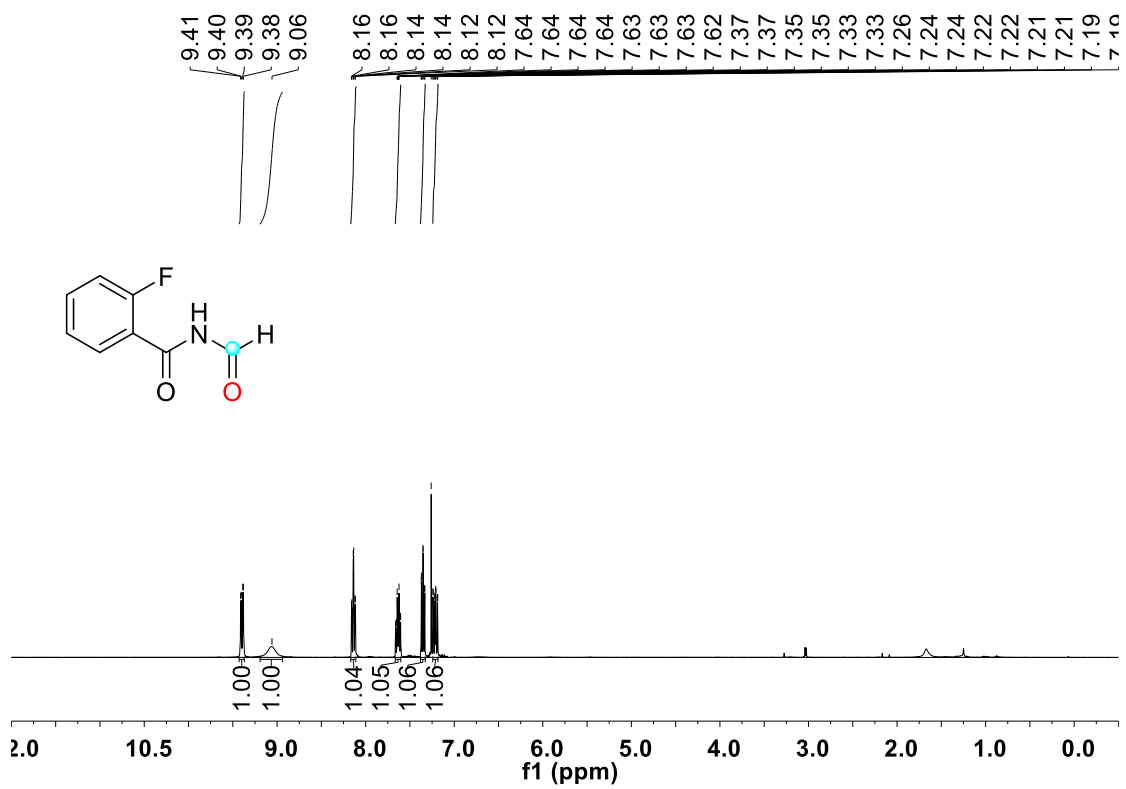

<sup>19</sup>F NMR (377 MHz, CDCl<sub>3</sub>) spectra for compound **2f**

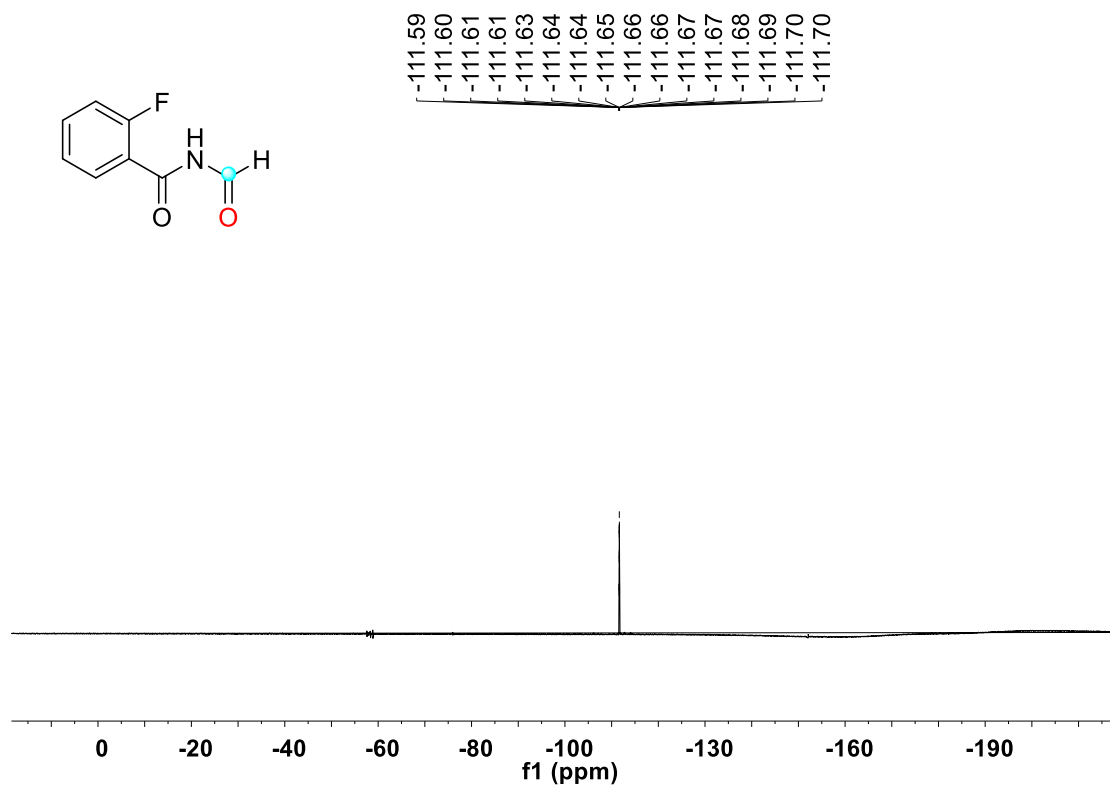

$^1\text{H}$  NMR (400 MHz,  $\text{CDCl}_3$ ) spectra for compound **2g**

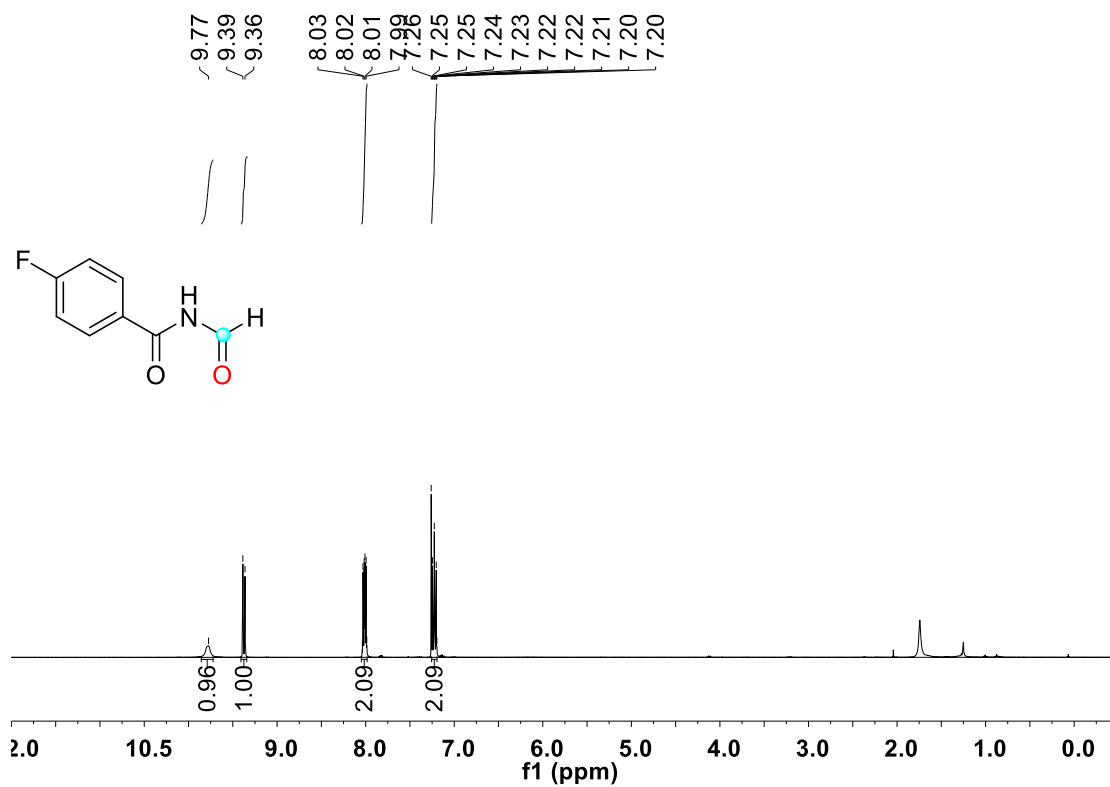

$^{19}\text{F}$  NMR (377 MHz,  $\text{CDCl}_3$ ) spectra for compound **2g**

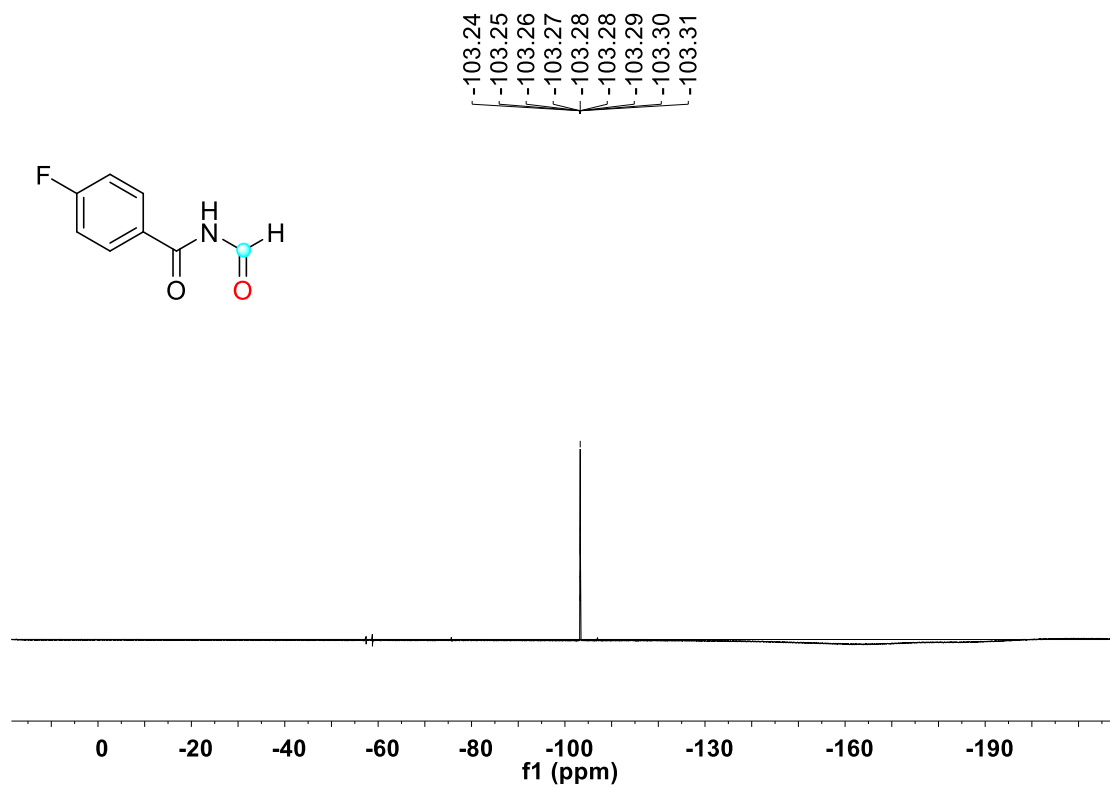

<sup>1</sup>H NMR (400 MHz, CDCl<sub>3</sub>) spectra for compound **2h**

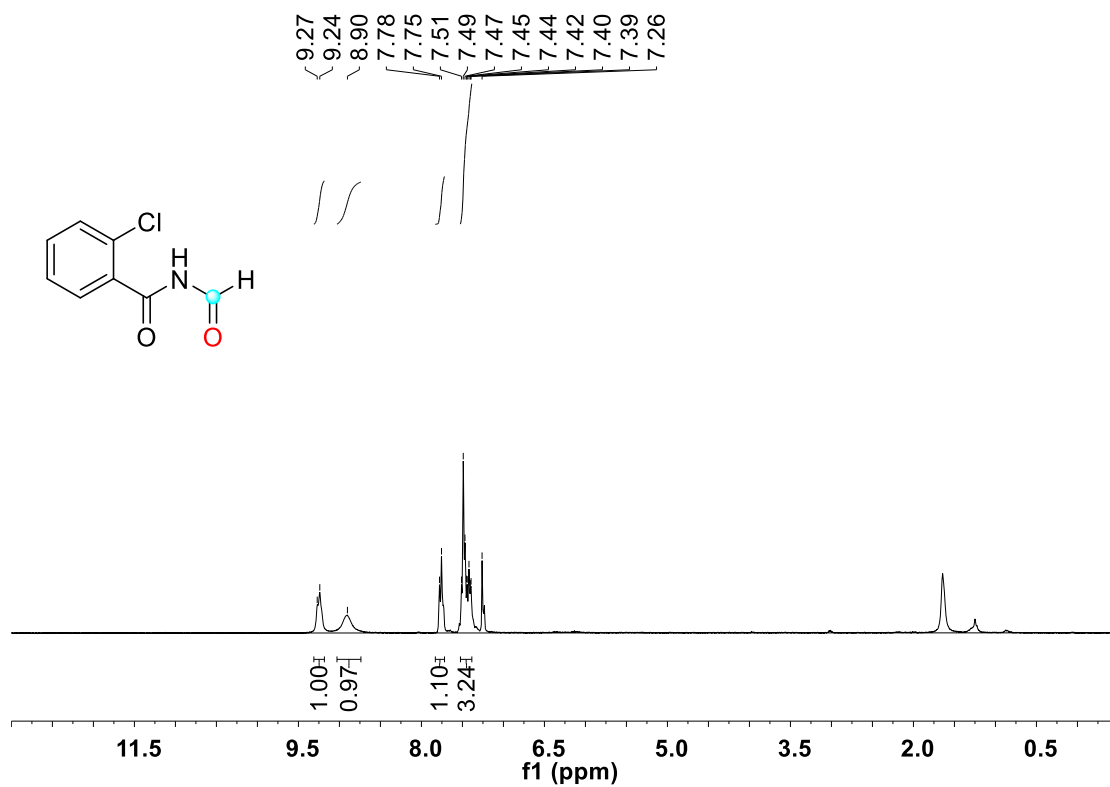

<sup>1</sup>H NMR (400 MHz, CDCl<sub>3</sub>) spectra for compound **2i**

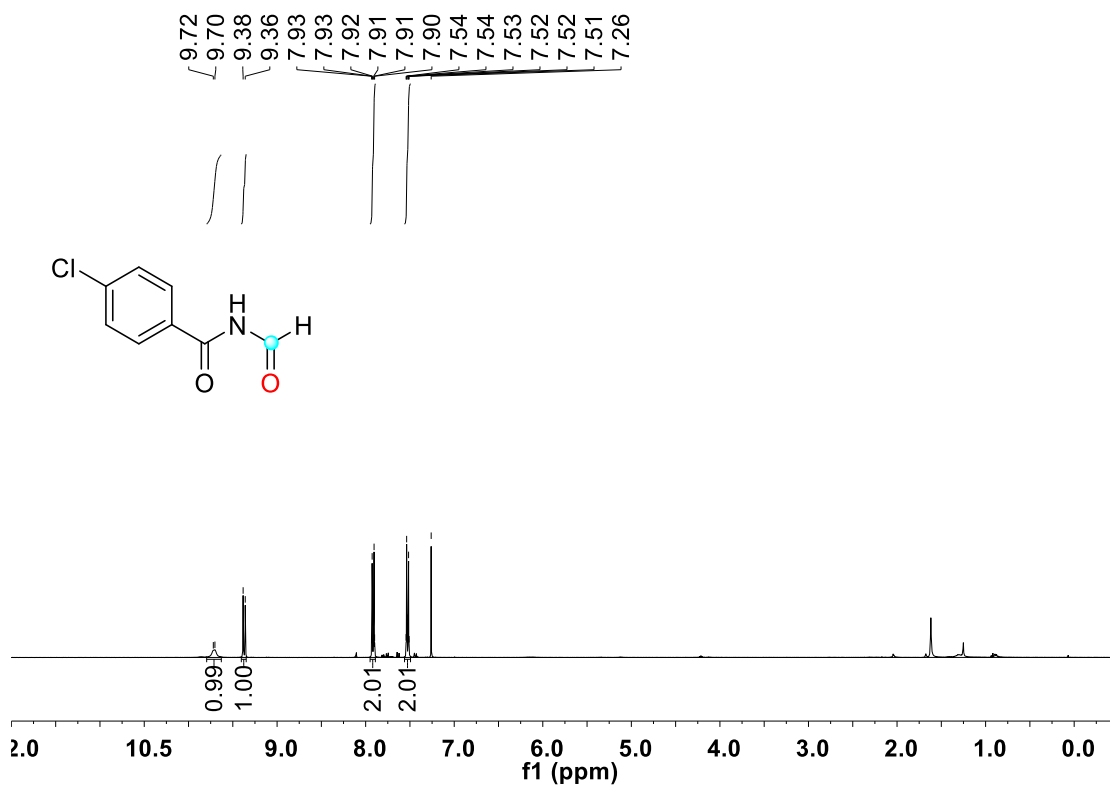

<sup>1</sup>H NMR (400 MHz, CDCl<sub>3</sub>) spectra for compound **2j**

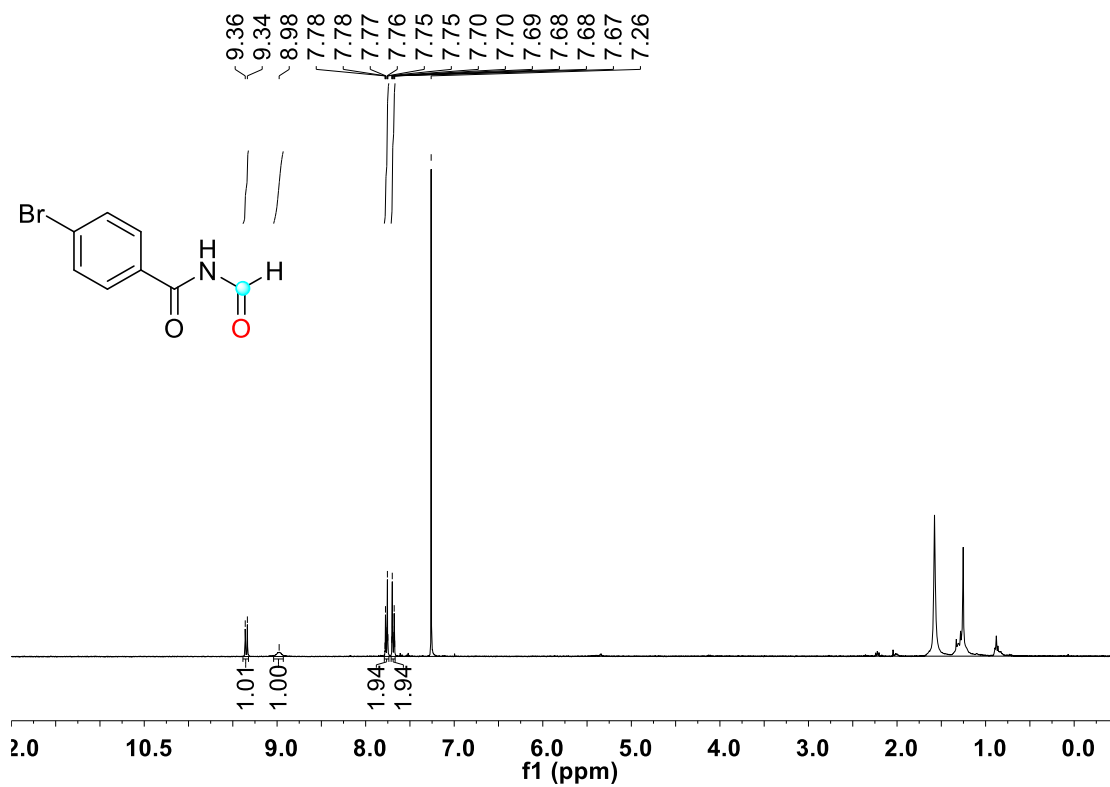

<sup>1</sup>H NMR (400 MHz, CDCl<sub>3</sub>) spectra for compound **2k**

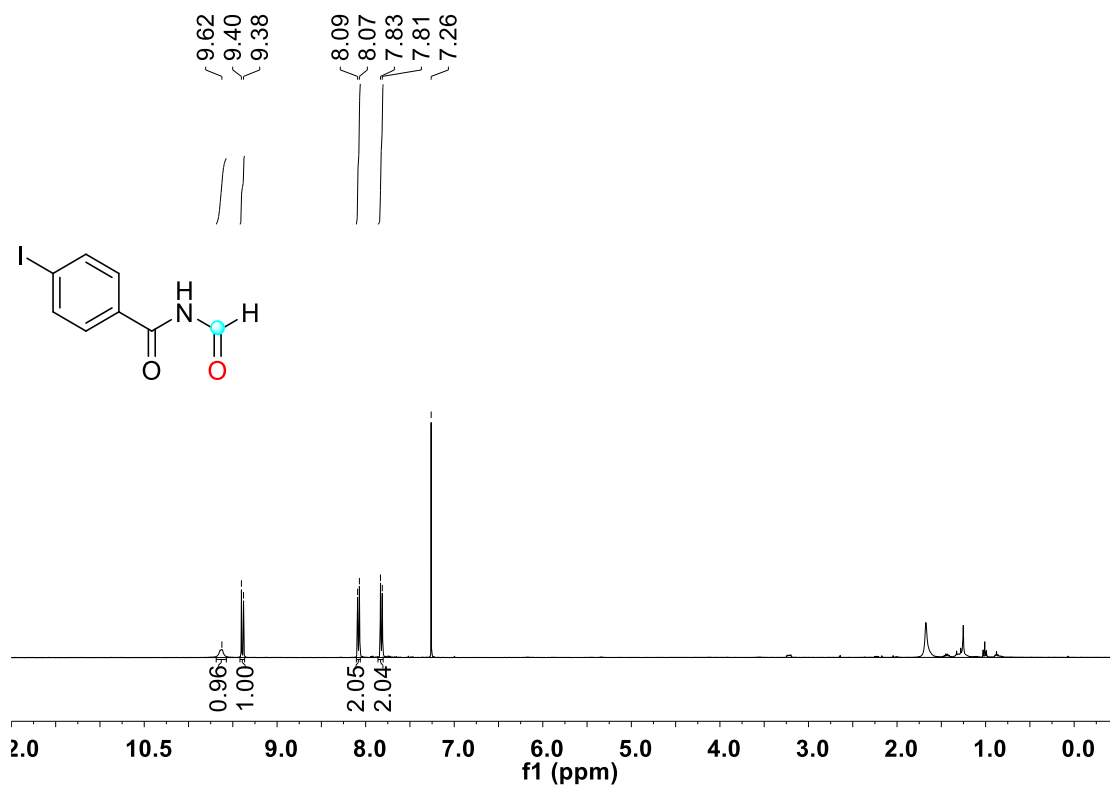

$^{13}\text{C}$  NMR (126 MHz,  $\text{CDCl}_3$ ) spectra for compound **2k**

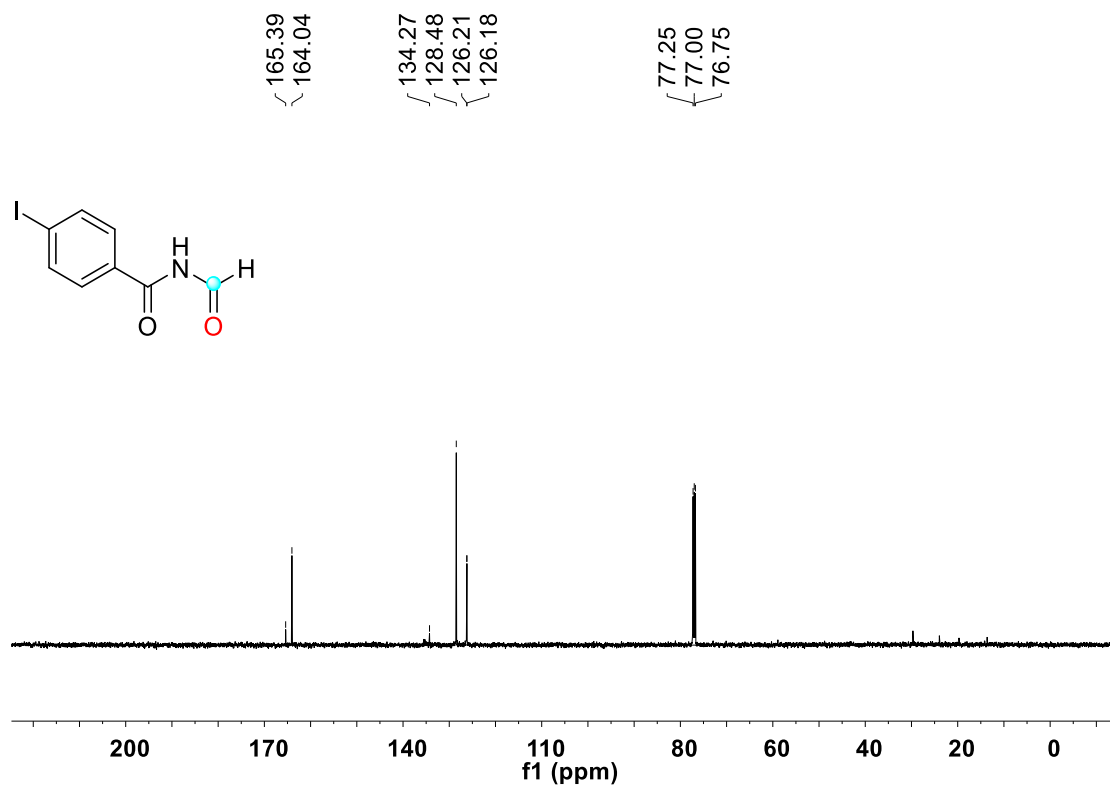

$^1\text{H}$  NMR (400 MHz,  $\text{CDCl}_3$ ) spectra for compound **2l**

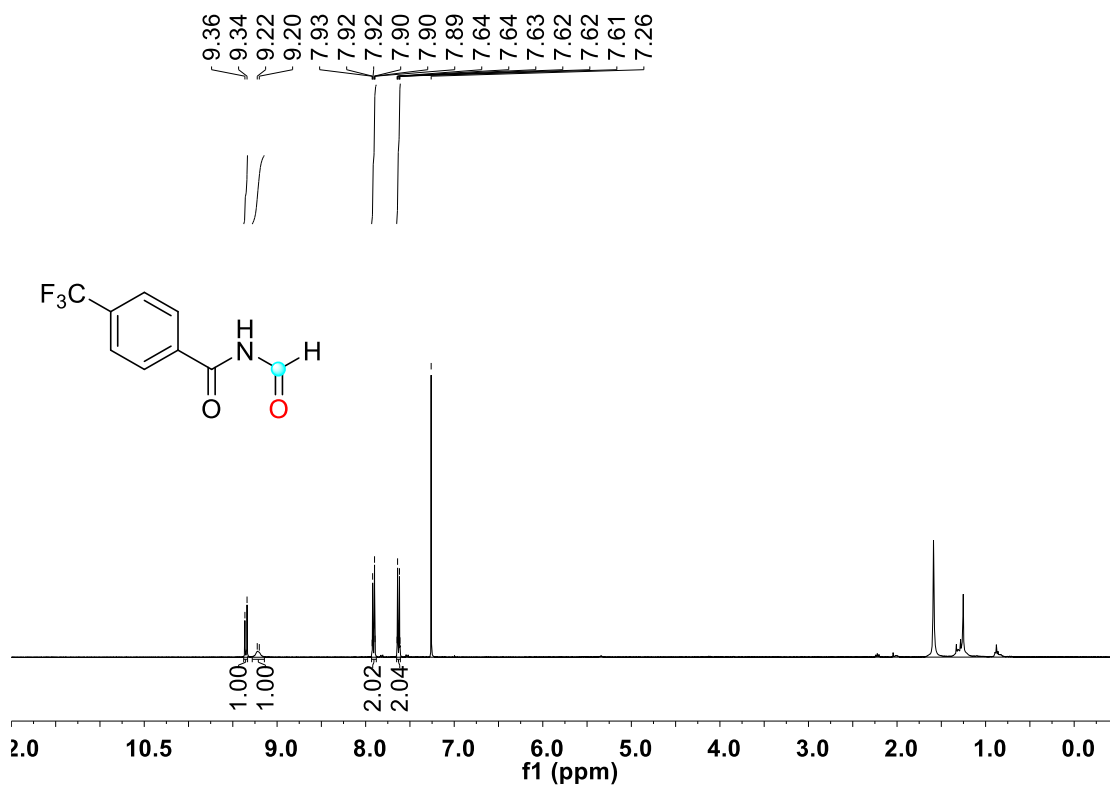

<sup>13</sup>C NMR (126 MHz, CDCl<sub>3</sub>) spectra for compound **21**

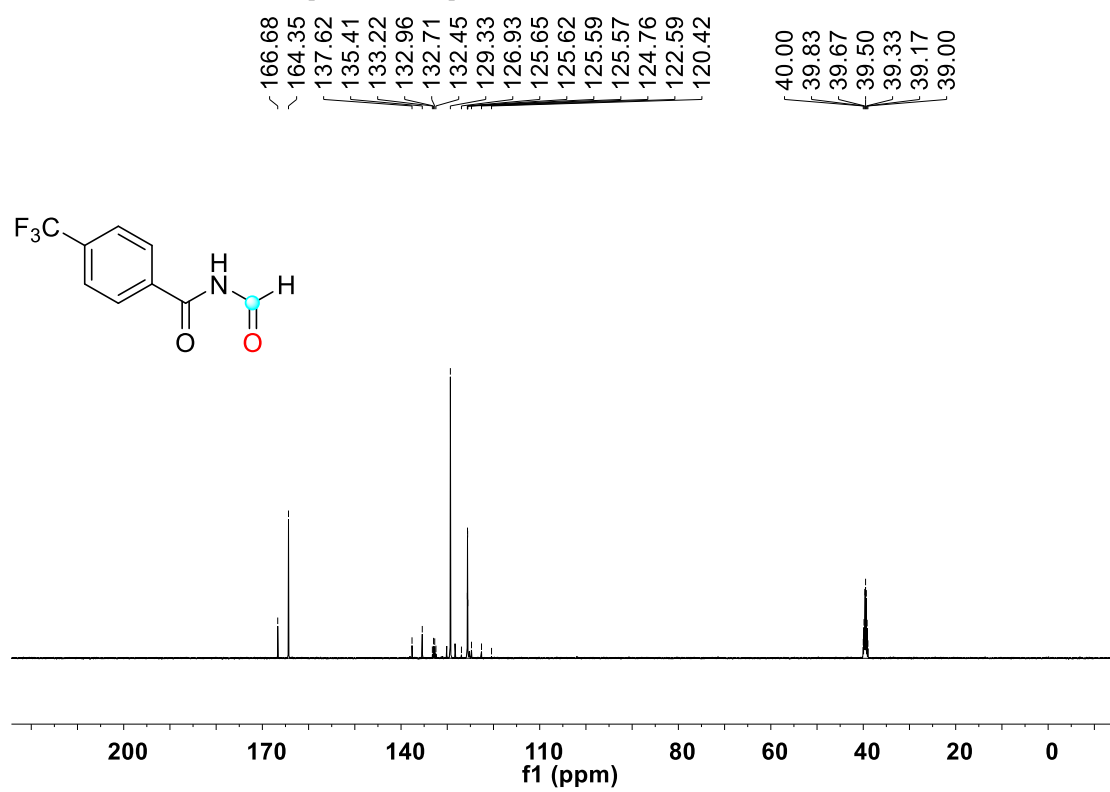

<sup>19</sup>F NMR (377 MHz, CDCl<sub>3</sub>) spectra for compound **21**

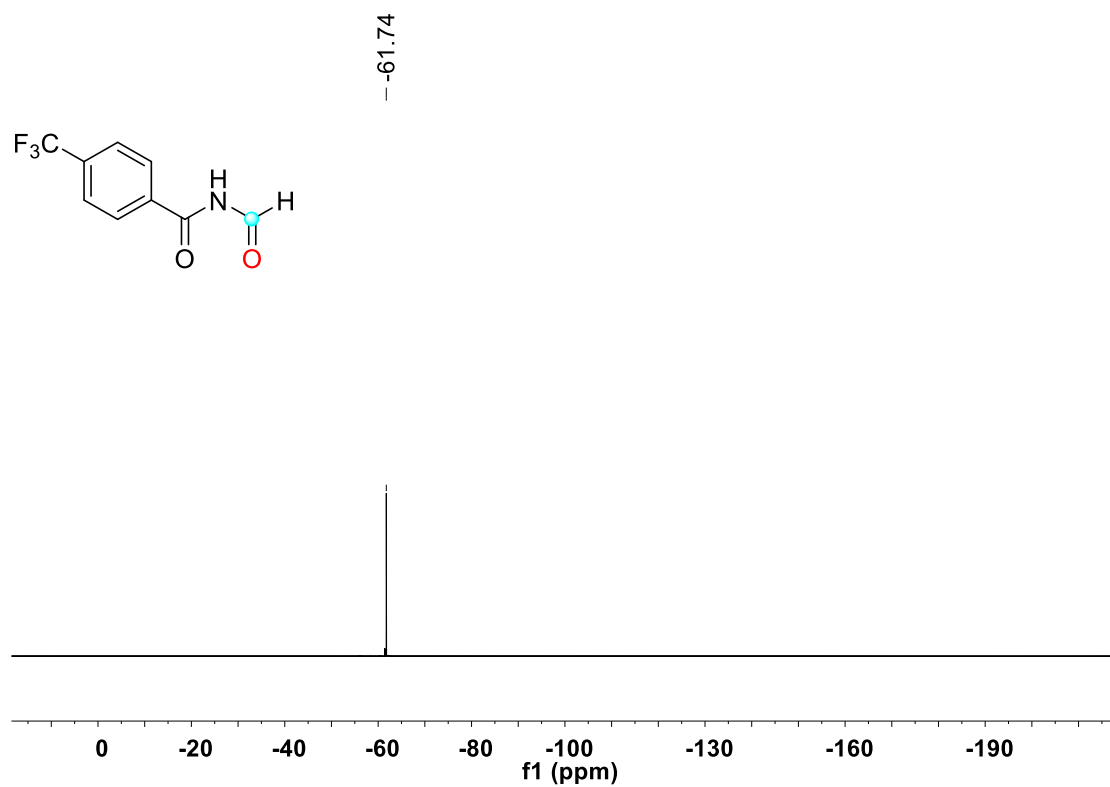

<sup>1</sup>H NMR (400 MHz, CDCl<sub>3</sub>) spectra for compound **2m**

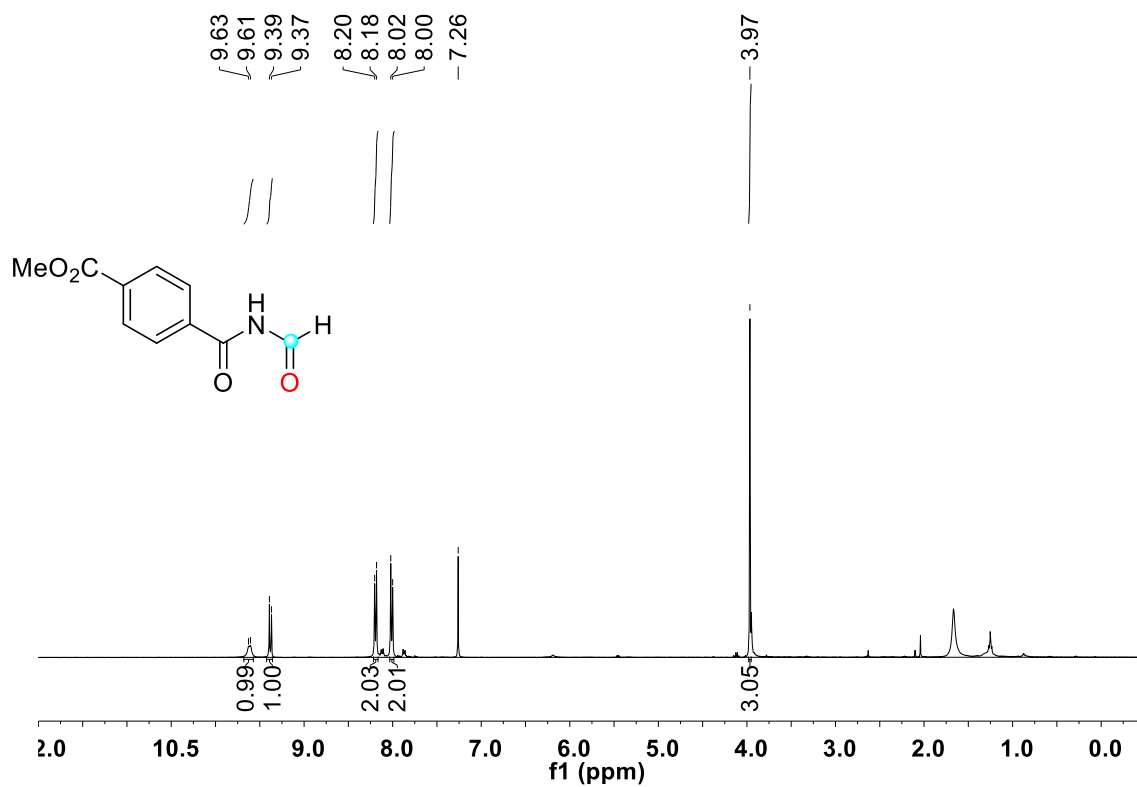

<sup>13</sup>C NMR (126 MHz, CDCl<sub>3</sub>) spectra for compound **2m**

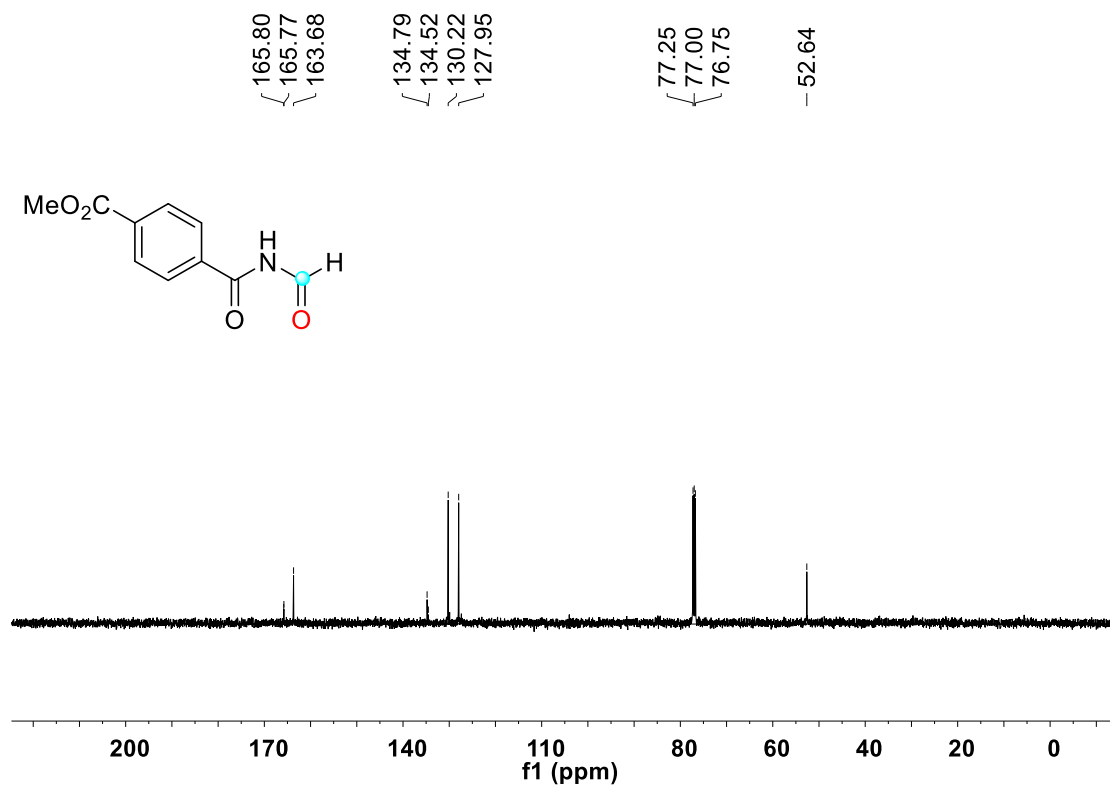

<sup>1</sup>H NMR (400 MHz, CDCl<sub>3</sub>) spectra for compound **2n**

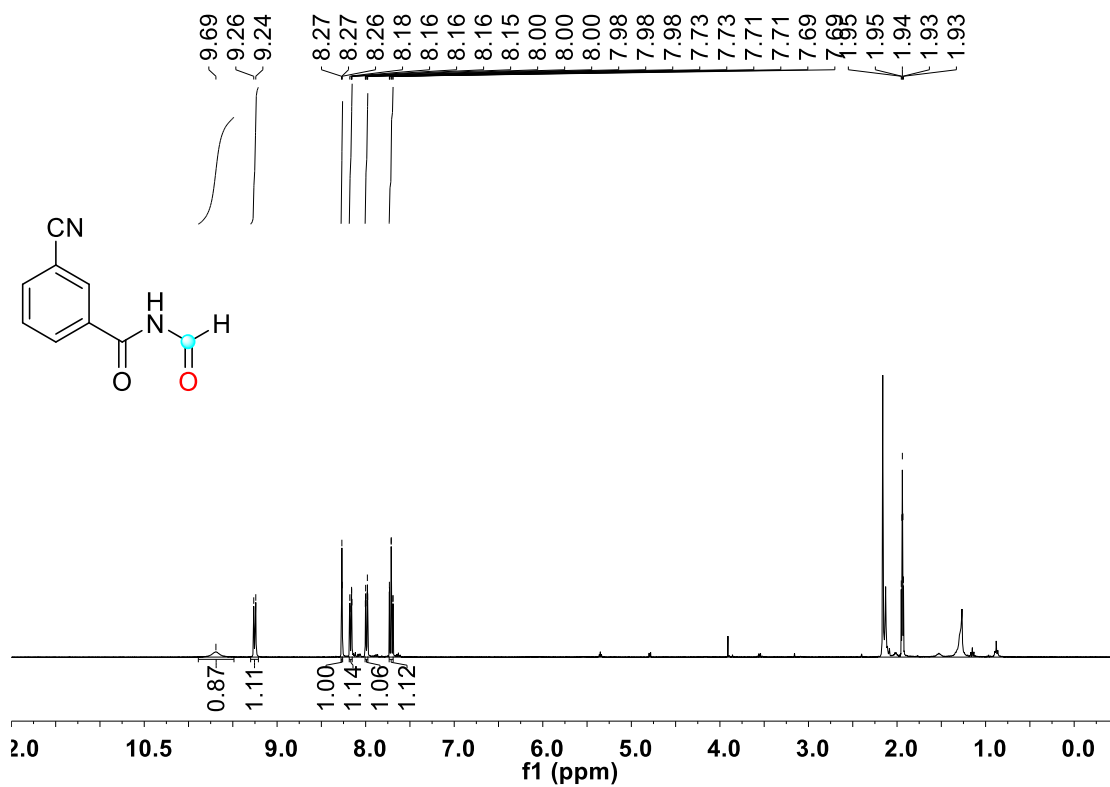

<sup>13</sup>C NMR (126 MHz, CDCl<sub>3</sub>) spectra for compound **2n**

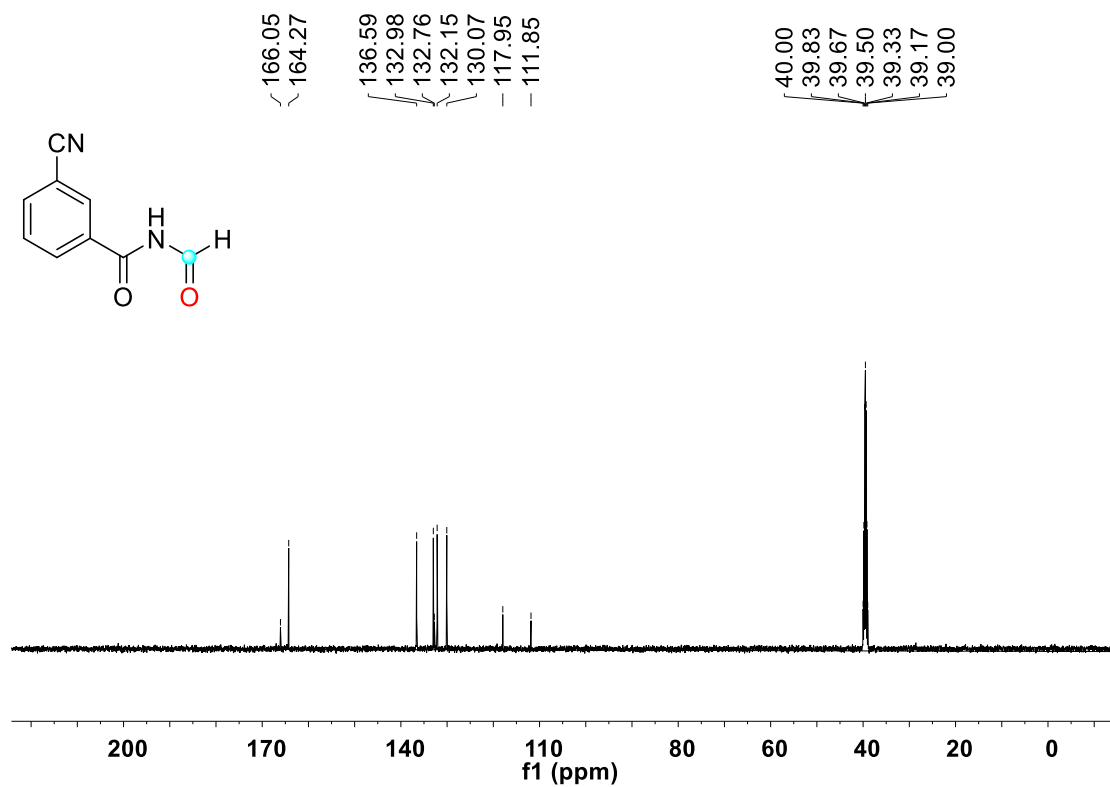



<sup>1</sup>H NMR (400 MHz, CDCl<sub>3</sub>) spectra for compound **2o**

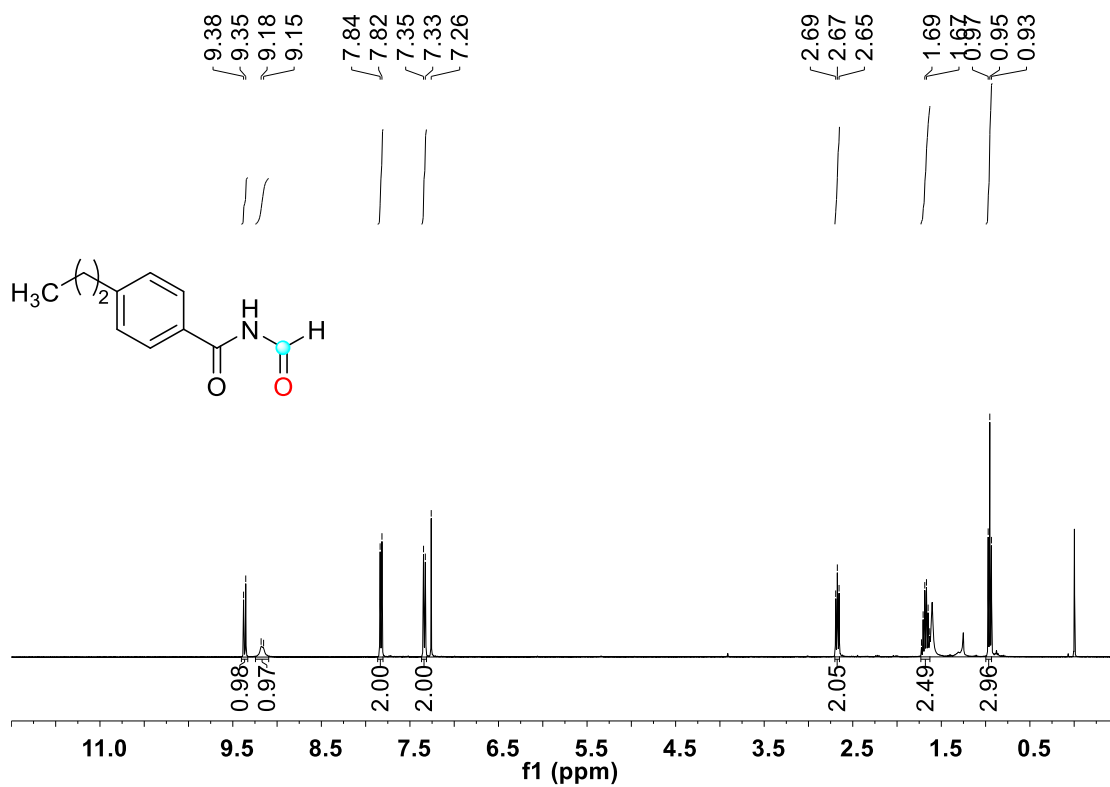

<sup>13</sup>C NMR (126 MHz, CDCl<sub>3</sub>) spectra for compound **2o**

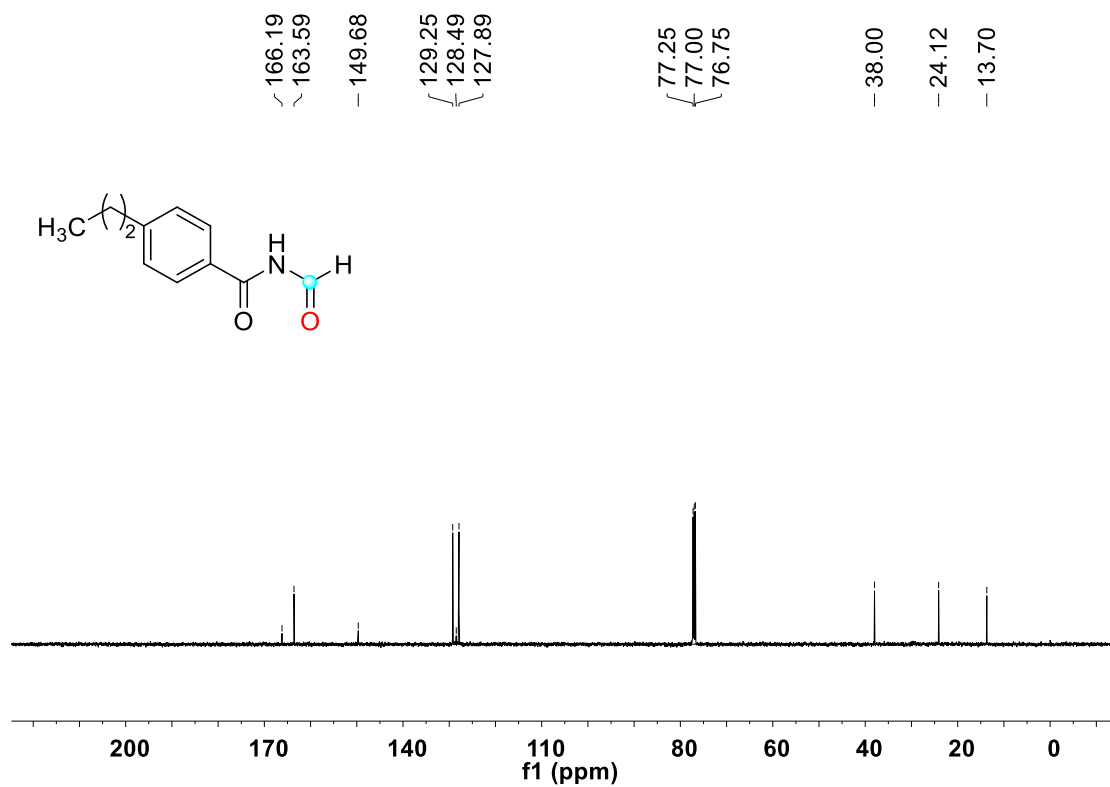

<sup>1</sup>H NMR (400 MHz, CDCl<sub>3</sub>) spectra for compound **2p**

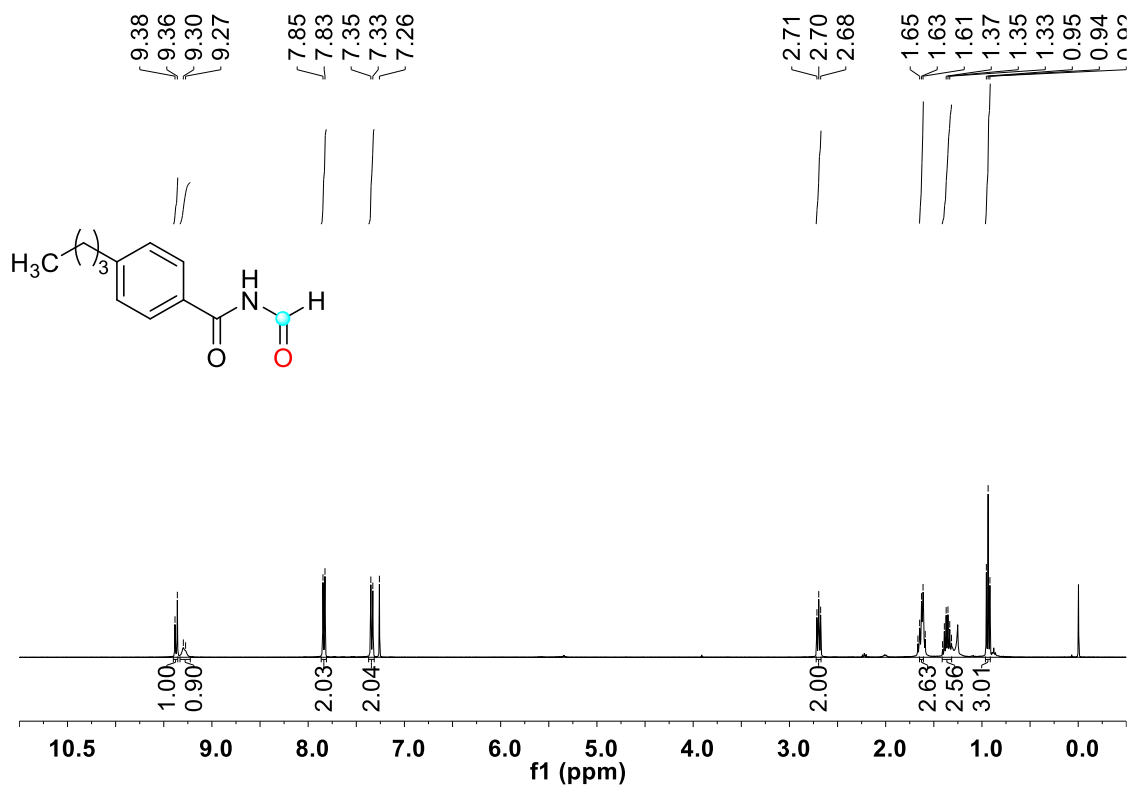

<sup>13</sup>C NMR (126 MHz, CDCl<sub>3</sub>) spectra for compound **2p**

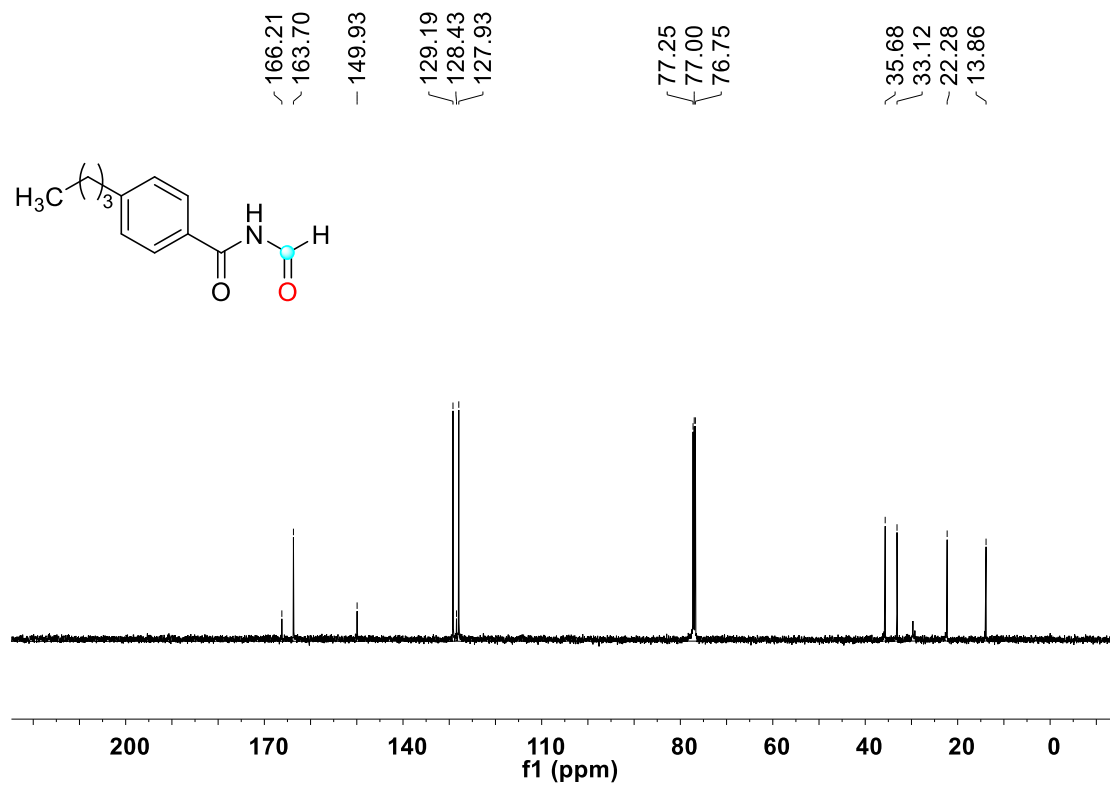

<sup>1</sup>H NMR (400 MHz, CDCl<sub>3</sub>) spectra for compound **2q**

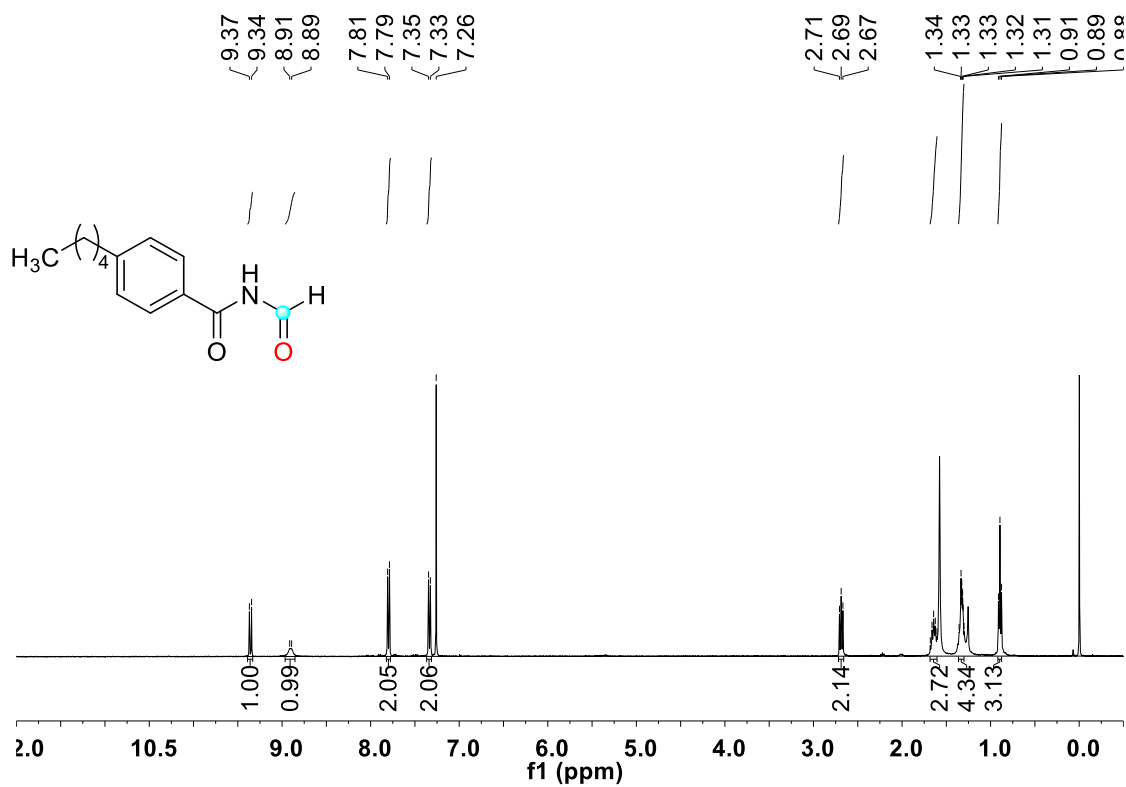

<sup>13</sup>C NMR (126 MHz, CDCl<sub>3</sub>) spectra for compound **2q**

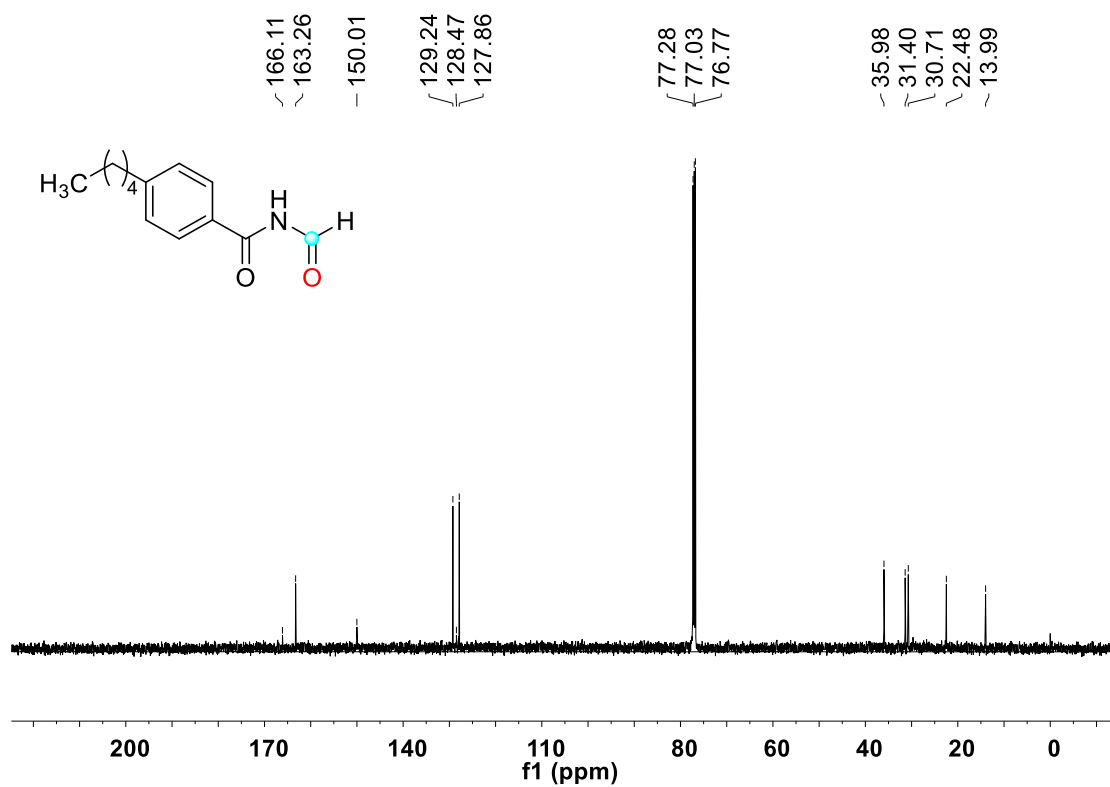

<sup>1</sup>H NMR (400 MHz, CDCl<sub>3</sub>) spectra for compound **2r**

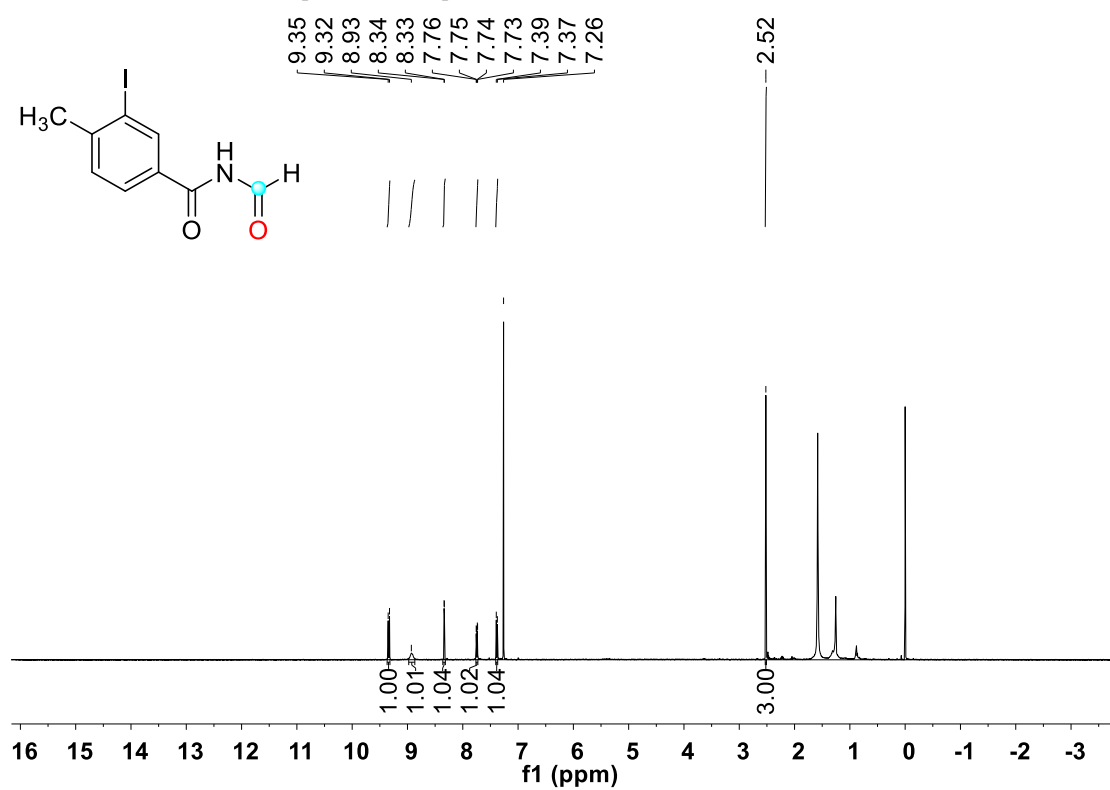

<sup>13</sup>C NMR (126 MHz, CDCl<sub>3</sub>) spectra for compound **2r**

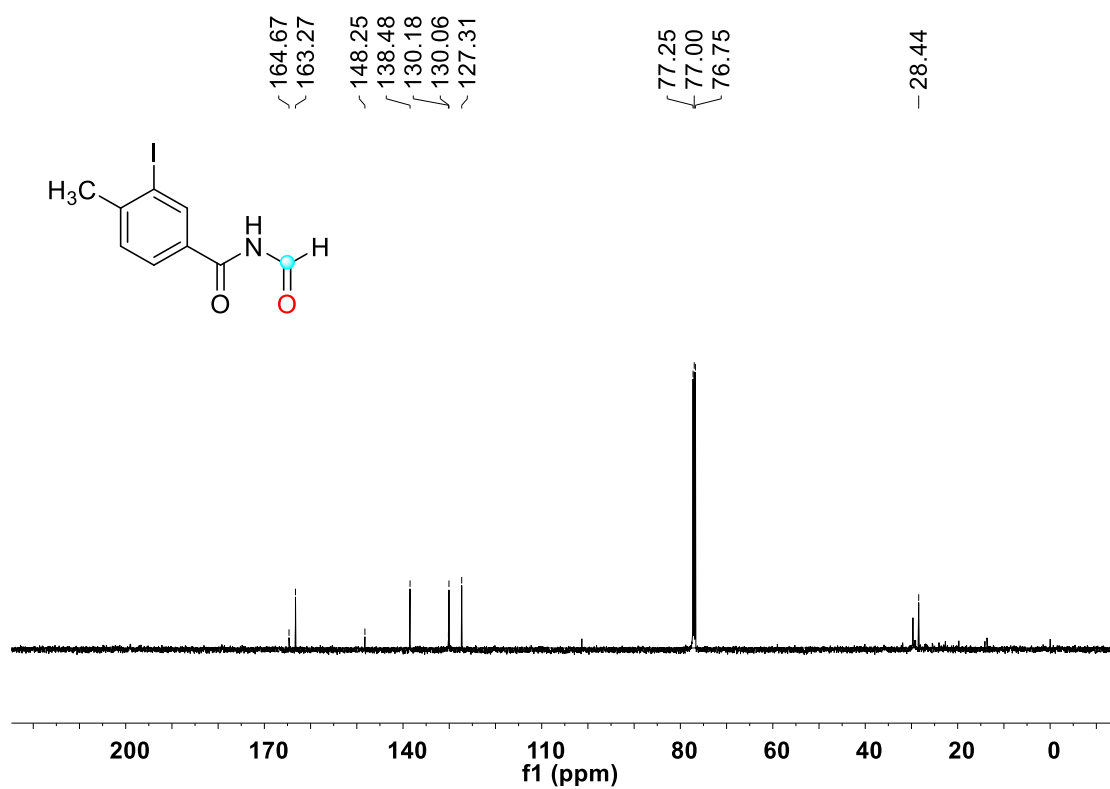

<sup>1</sup>H NMR (400 MHz, CDCl<sub>3</sub>) spectra for compound 2s

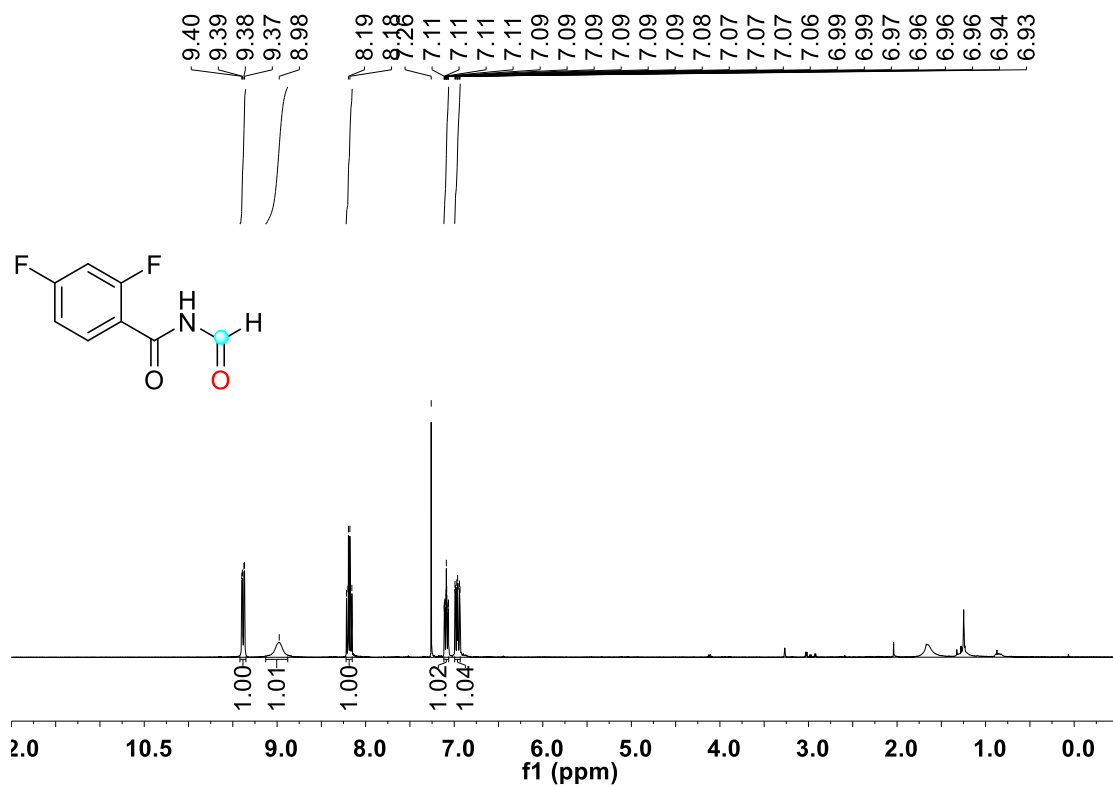

<sup>13</sup>C NMR (126 MHz, CDCl<sub>3</sub>) spectra for compound 2s

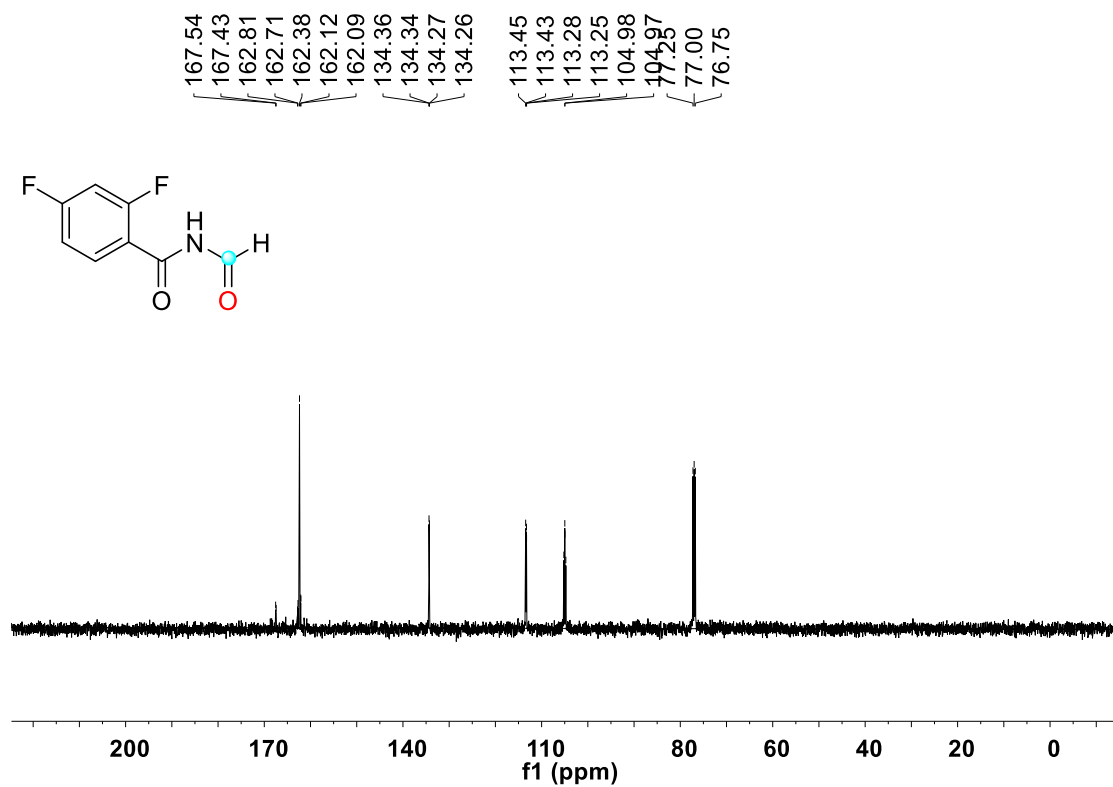

$^{19}\text{F}$  NMR (377 MHz,  $\text{CDCl}_3$ ) spectra for compound **2s**

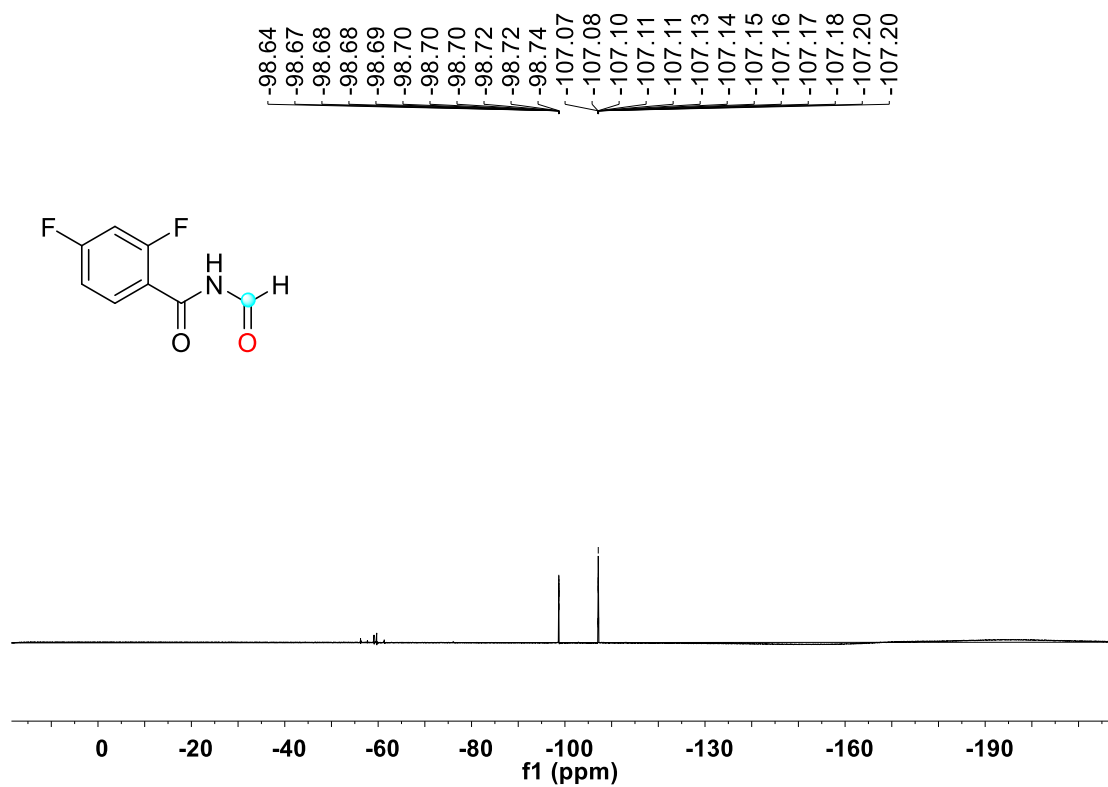

$^1\text{H}$  NMR (400 MHz,  $\text{CDCl}_3$ ) spectra for compound **2t**

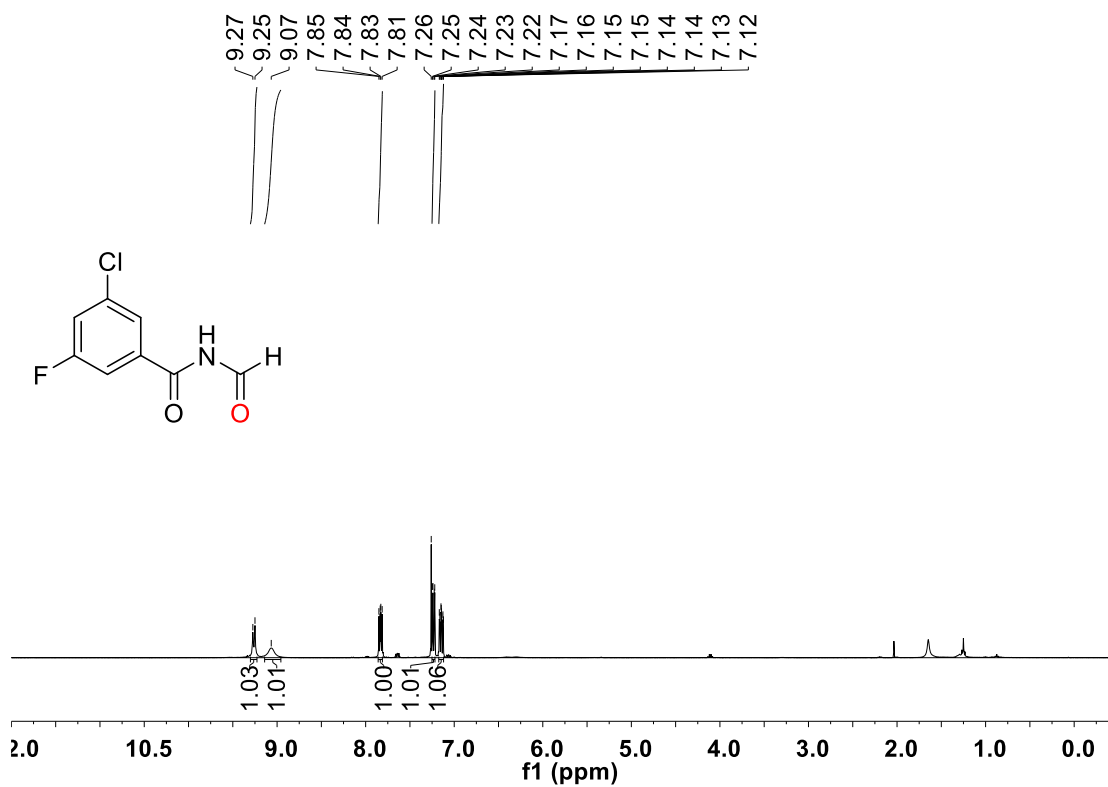

<sup>13</sup>C NMR (126 MHz, CDCl<sub>3</sub>) spectra for compound **2t**

165.52  
165.06  
163.46  
162.34  
162.23  
133.11  
133.03  
127.90  
127.87  
118.58  
118.38  
115.34  
115.17  
77.25  
77.00  
76.75

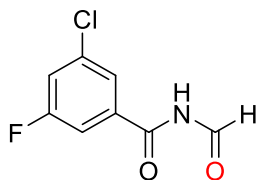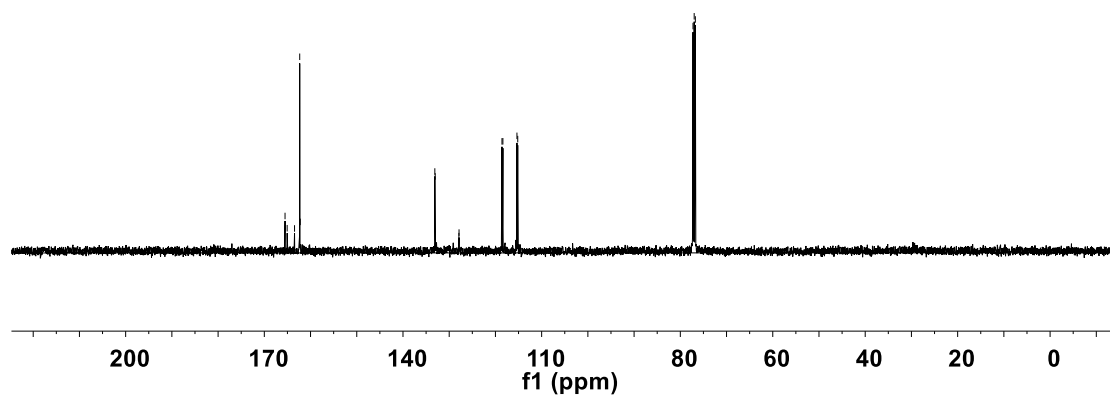

<sup>19</sup>F NMR (377 MHz, CDCl<sub>3</sub>) spectra for compound **2t**

-103.32  
-103.34  
-103.36  
-103.38

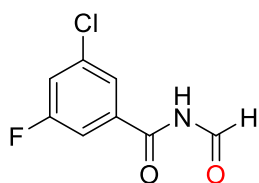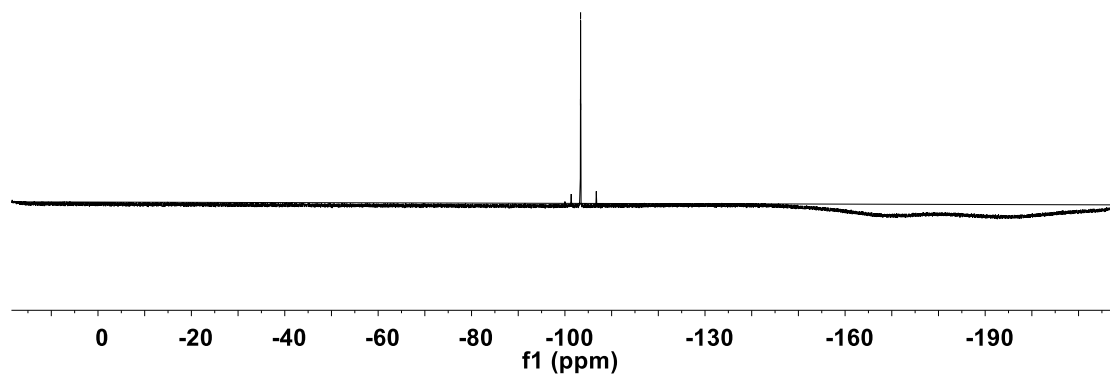

<sup>1</sup>H NMR (400 MHz, CDCl<sub>3</sub>) spectra for compound **2u**

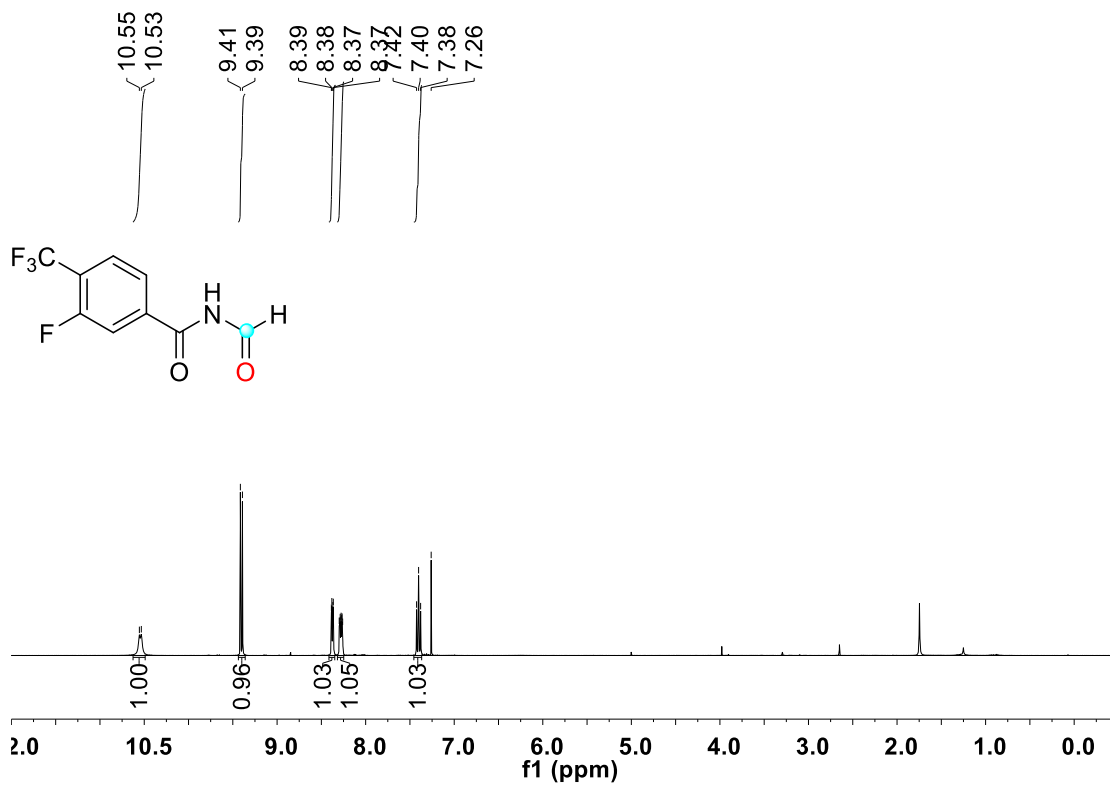

<sup>13</sup>C NMR (126 MHz, CDCl<sub>3</sub>) spectra for compound **2u**

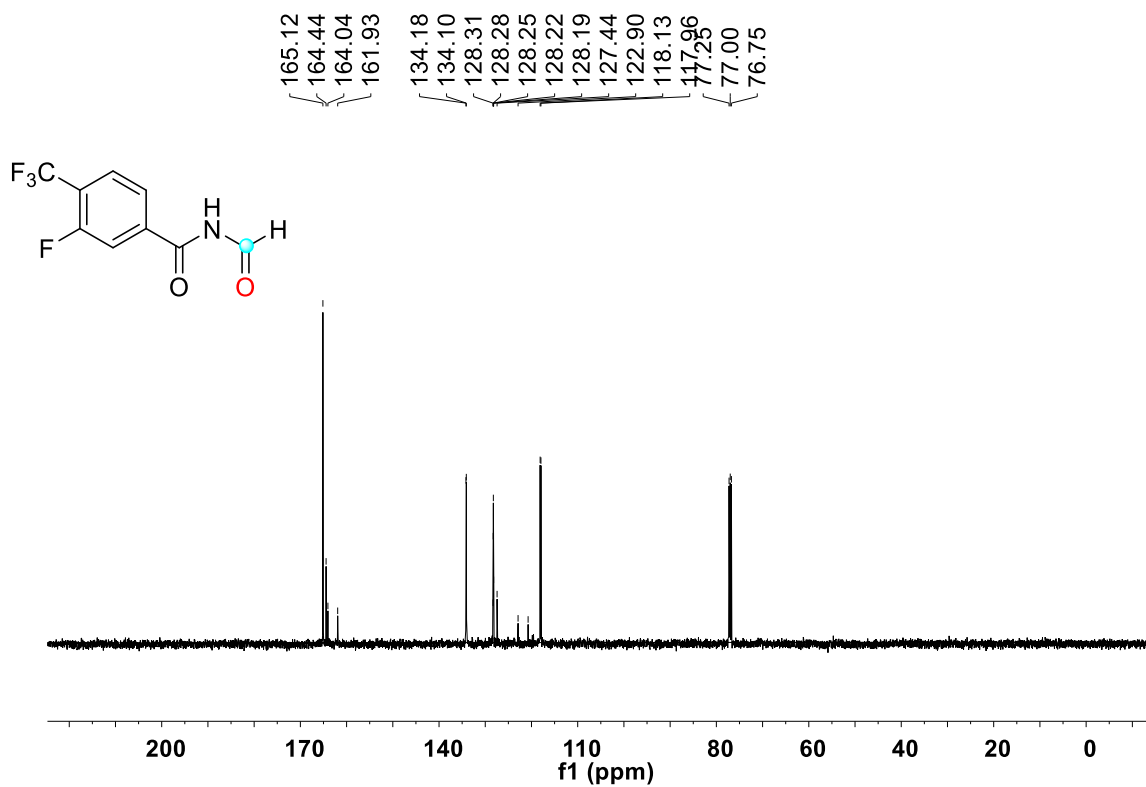





<sup>13</sup>C NMR (126 MHz, CDCl<sub>3</sub>) spectra for compound **2v**

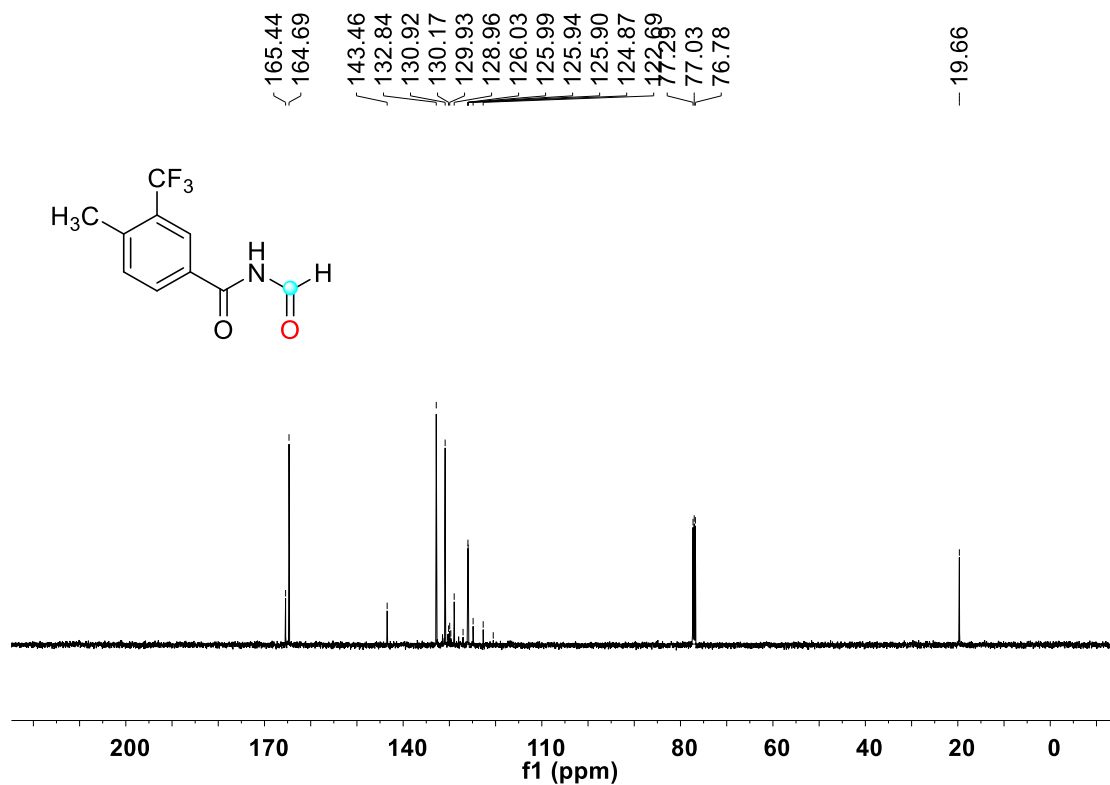

<sup>19</sup>F NMR (377 MHz, CDCl<sub>3</sub>) spectra for compound **2v**

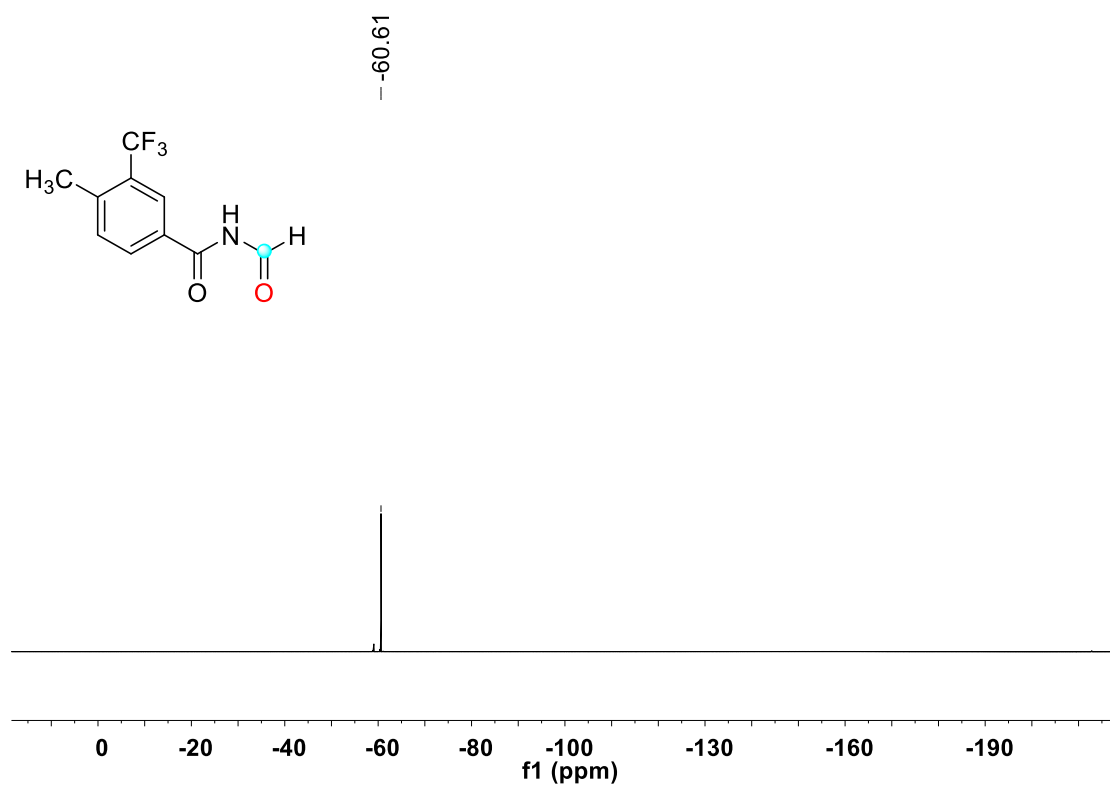

<sup>1</sup>H NMR (400 MHz, CDCl<sub>3</sub>) spectra for compound 2x

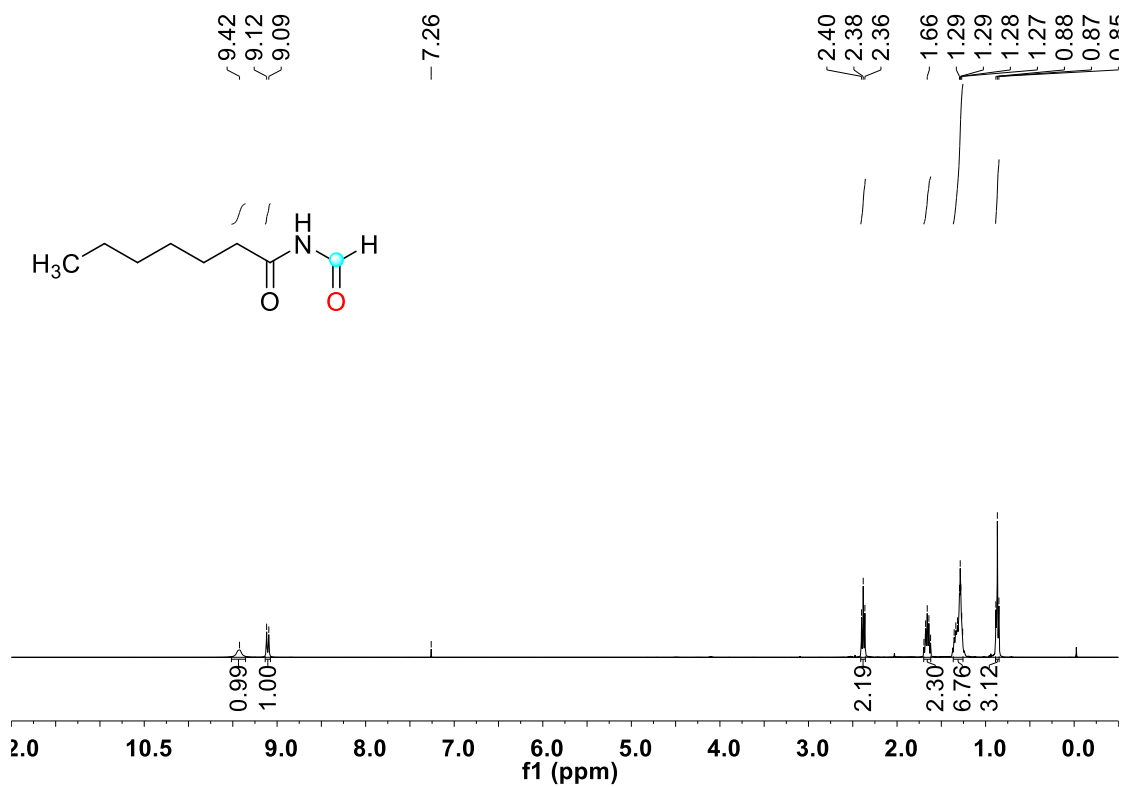

<sup>13</sup>C NMR (126 MHz, CDCl<sub>3</sub>) spectra for compound 2x

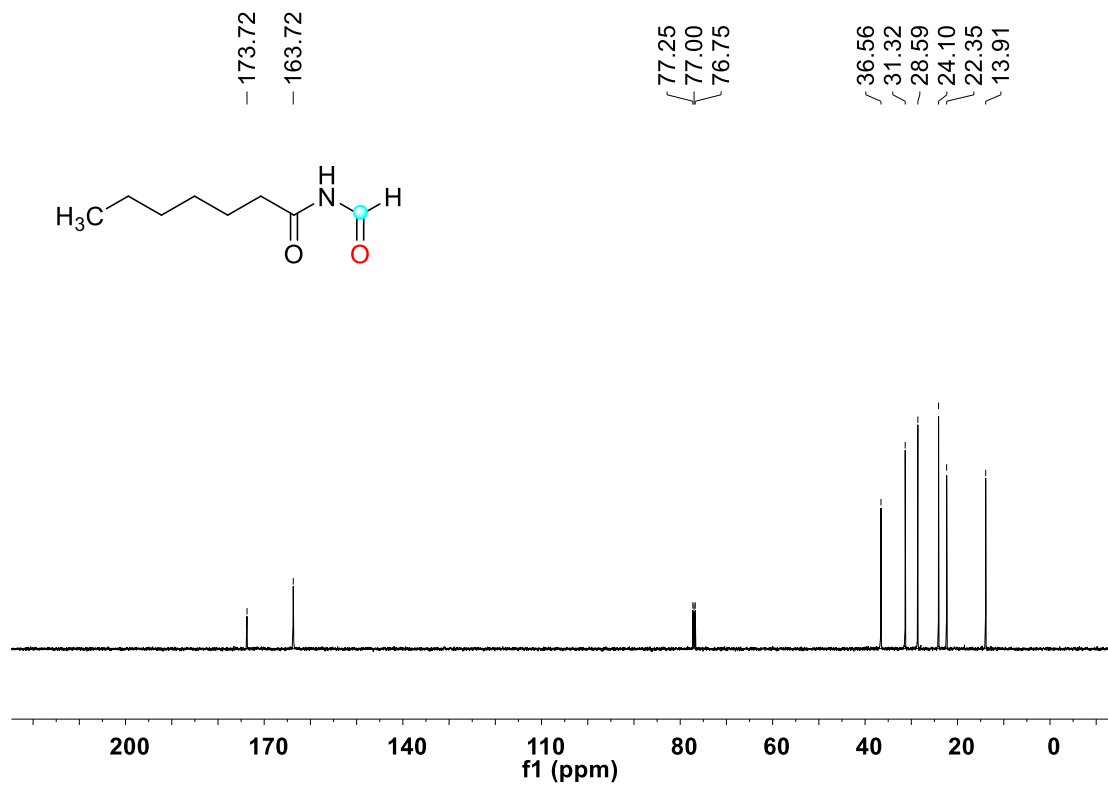

<sup>1</sup>H NMR (400 MHz, CDCl<sub>3</sub>) spectra for compound **2y**

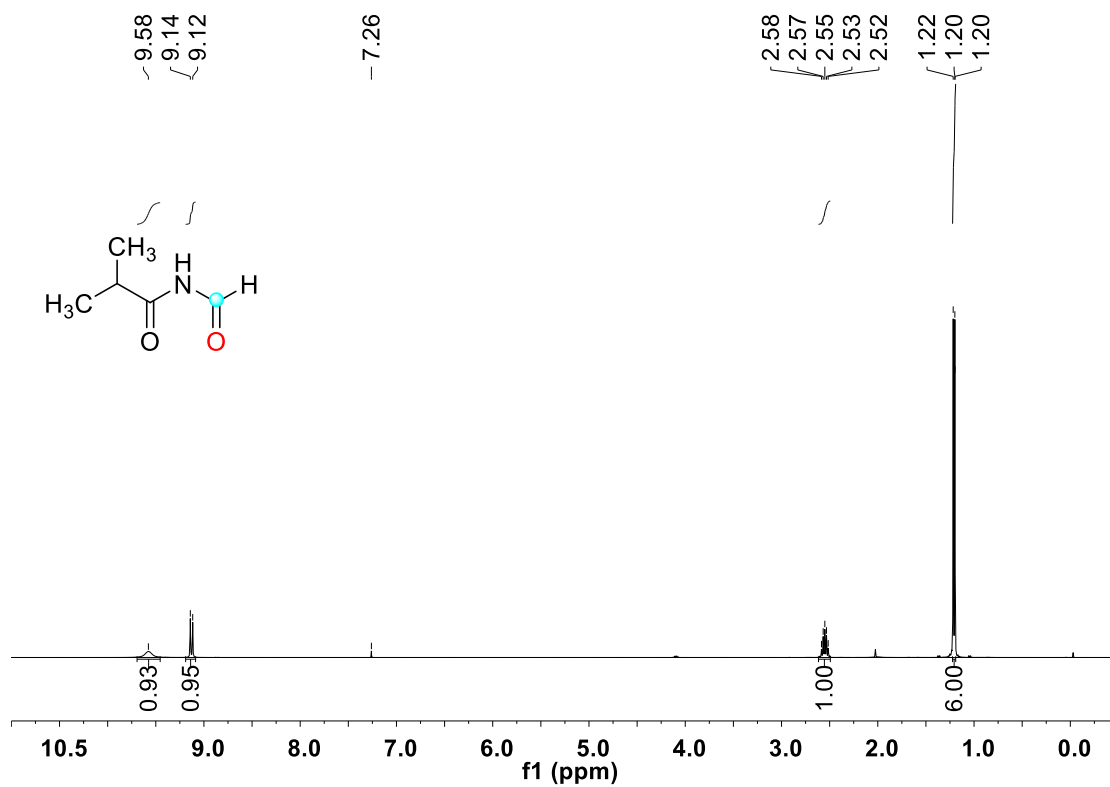

<sup>13</sup>C NMR (126 MHz, CDCl<sub>3</sub>) spectra for compound **2y**

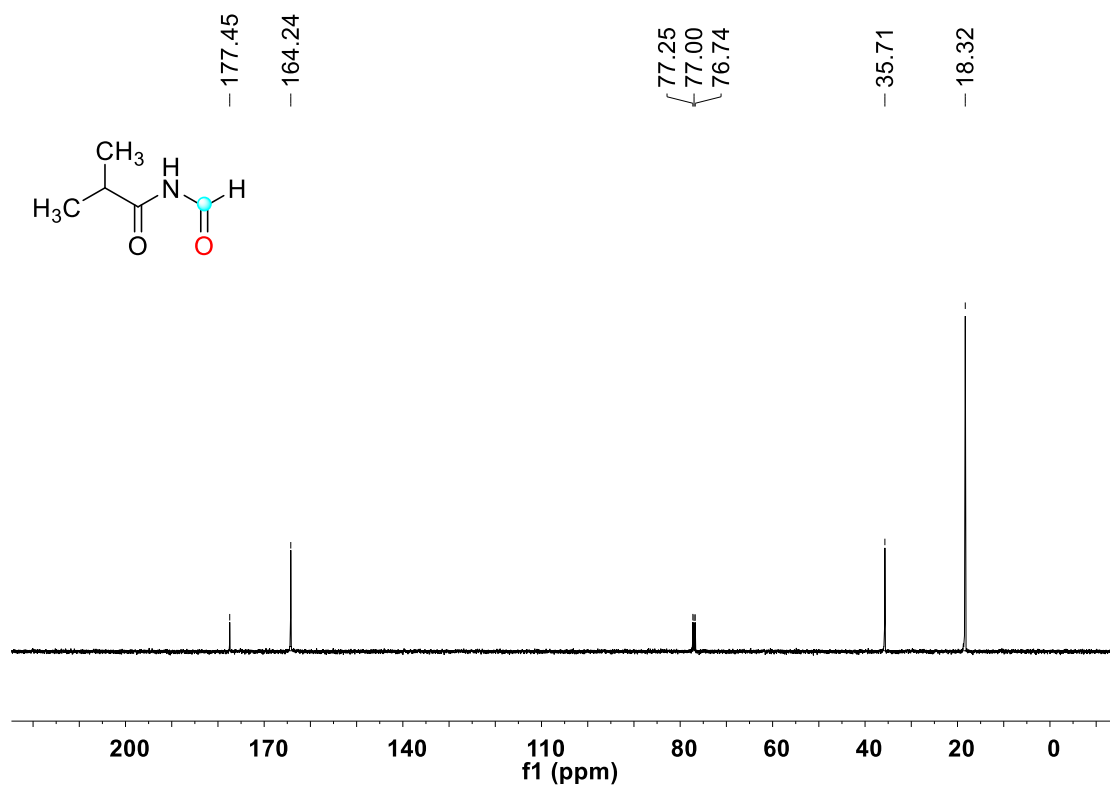

<sup>1</sup>H NMR (400 MHz, CDCl<sub>3</sub>) spectra for compound **2z**

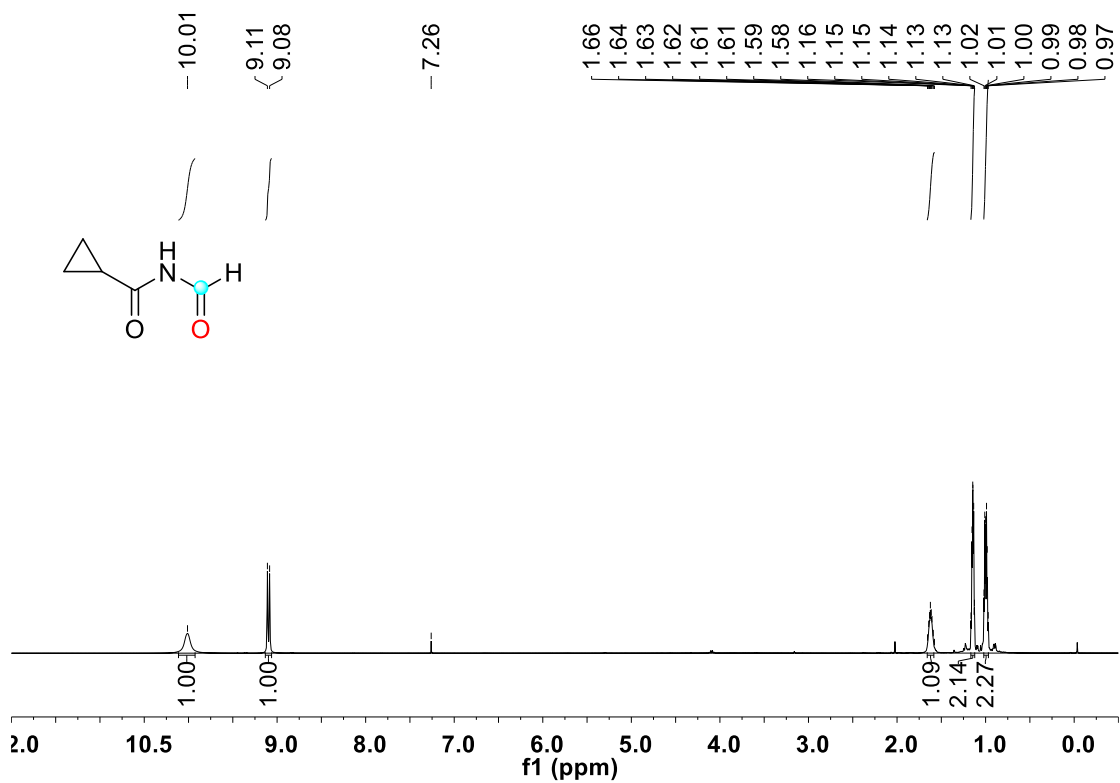

<sup>13</sup>C NMR (126 MHz, CDCl<sub>3</sub>) spectra for compound **2z**

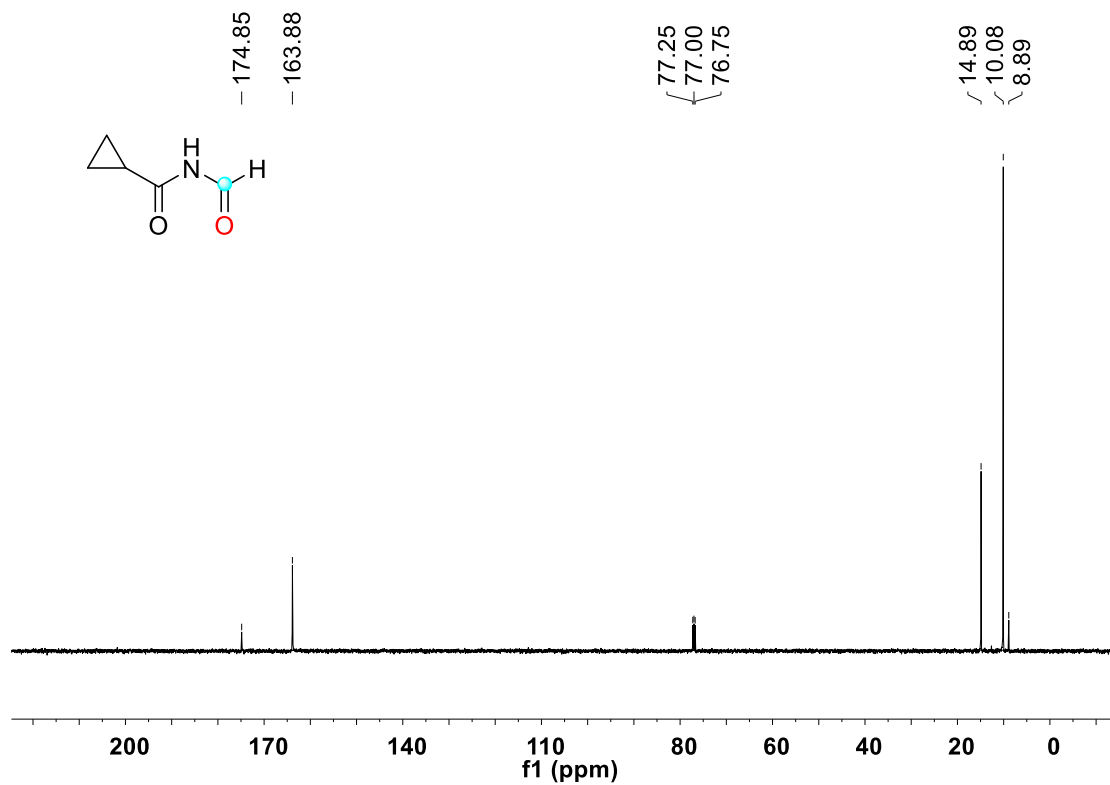

<sup>1</sup>H NMR (400 MHz, CDCl<sub>3</sub>) spectra for compound **2aa**

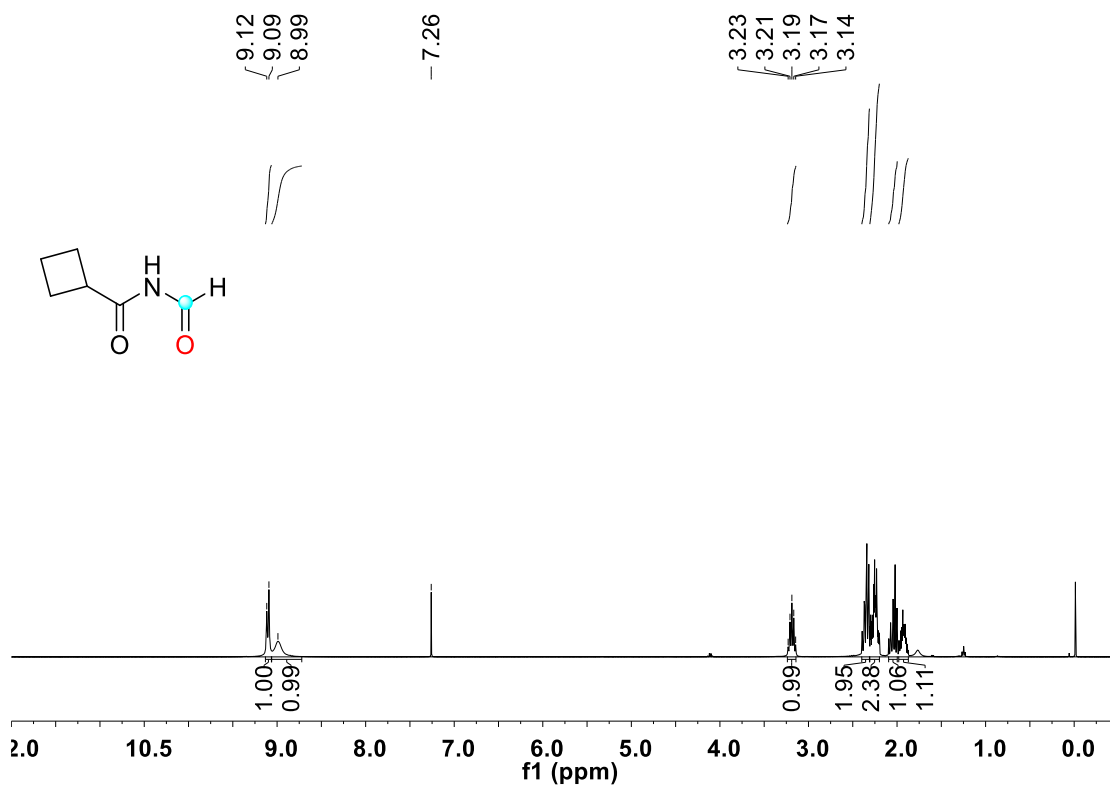

<sup>13</sup>C NMR (126 MHz, CDCl<sub>3</sub>) spectra for compound **2aa**

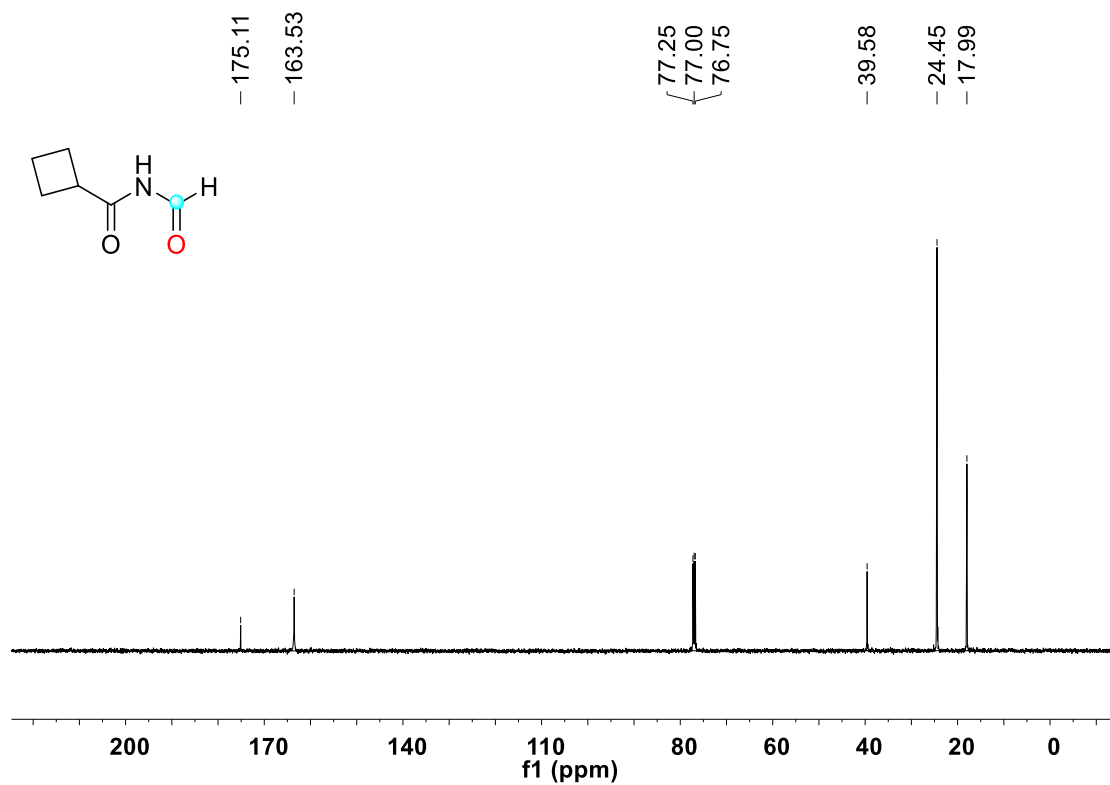

<sup>1</sup>H NMR (400 MHz, CDCl<sub>3</sub>) spectra for compound **2ab**

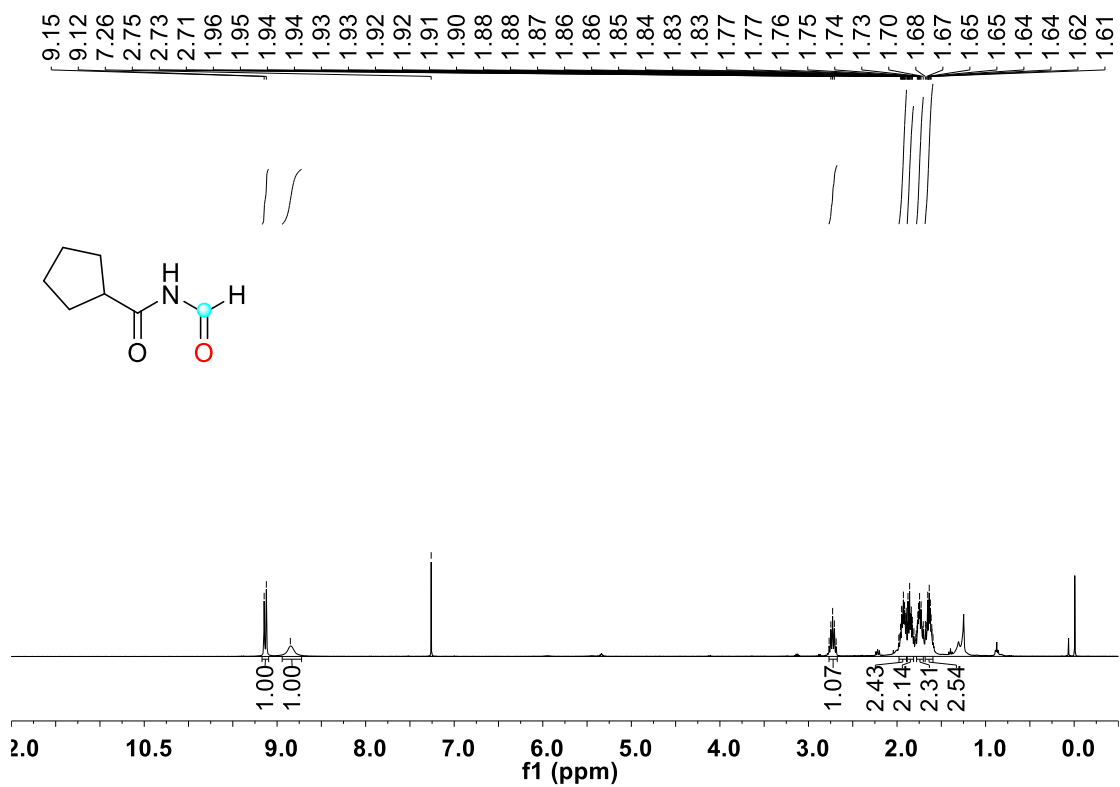

<sup>13</sup>C NMR (126 MHz, CDCl<sub>3</sub>) spectra for compound **2ab**

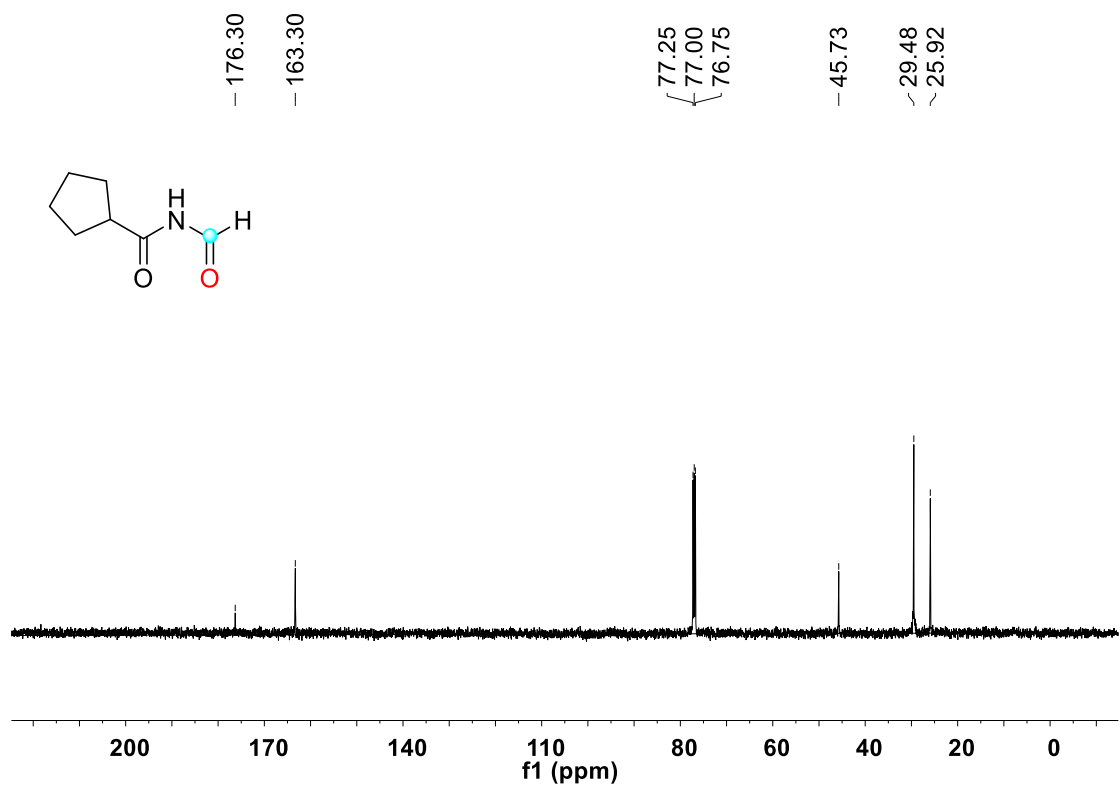

<sup>1</sup>H NMR (400 MHz, CDCl<sub>3</sub>) spectra for compound **2ac**

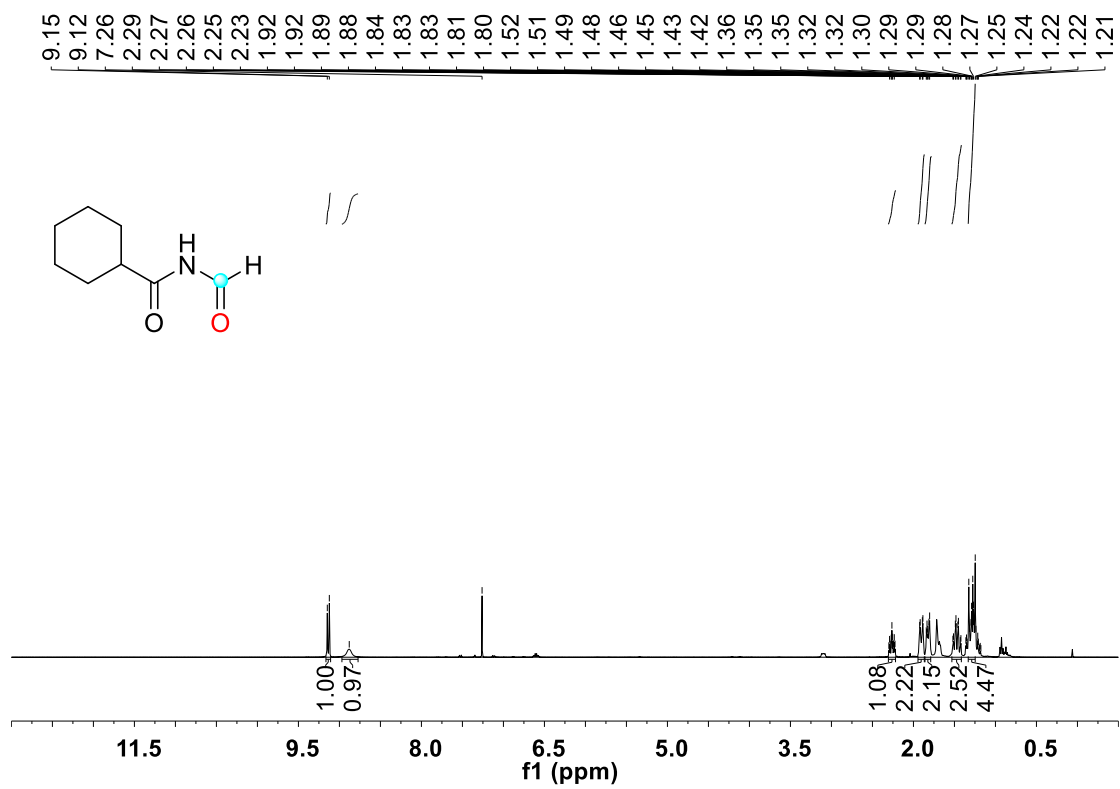

<sup>1</sup>H NMR (400 MHz, CDCl<sub>3</sub>) spectra for compound **2ad**

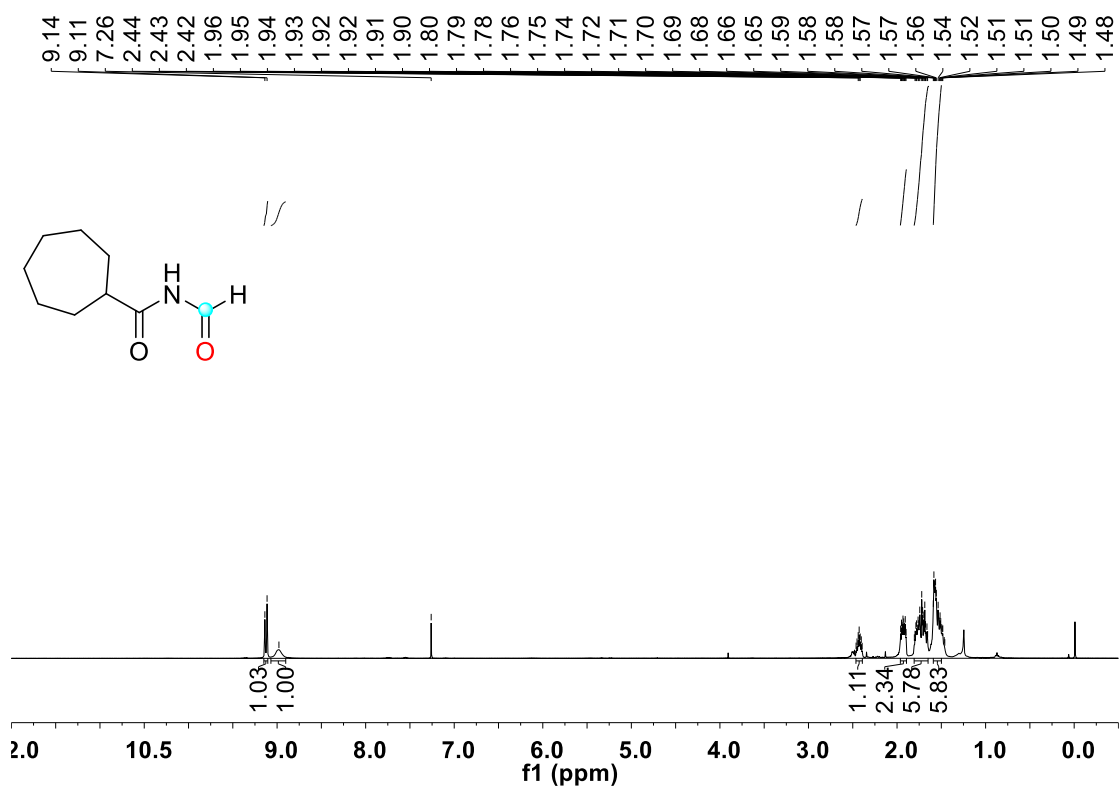



<sup>13</sup>C NMR (126 MHz, CDCl<sub>3</sub>) spectra for compound **2ad**

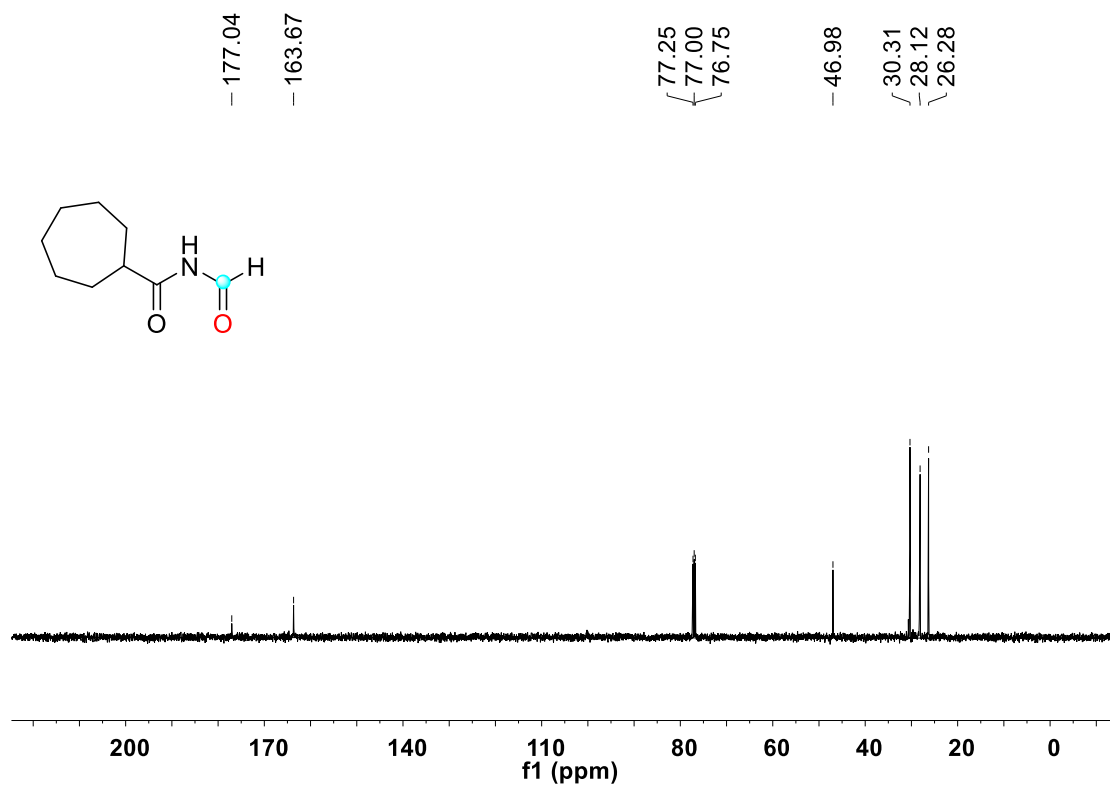

<sup>1</sup>H NMR (400 MHz, CDCl<sub>3</sub>) spectra for compound **2ae**

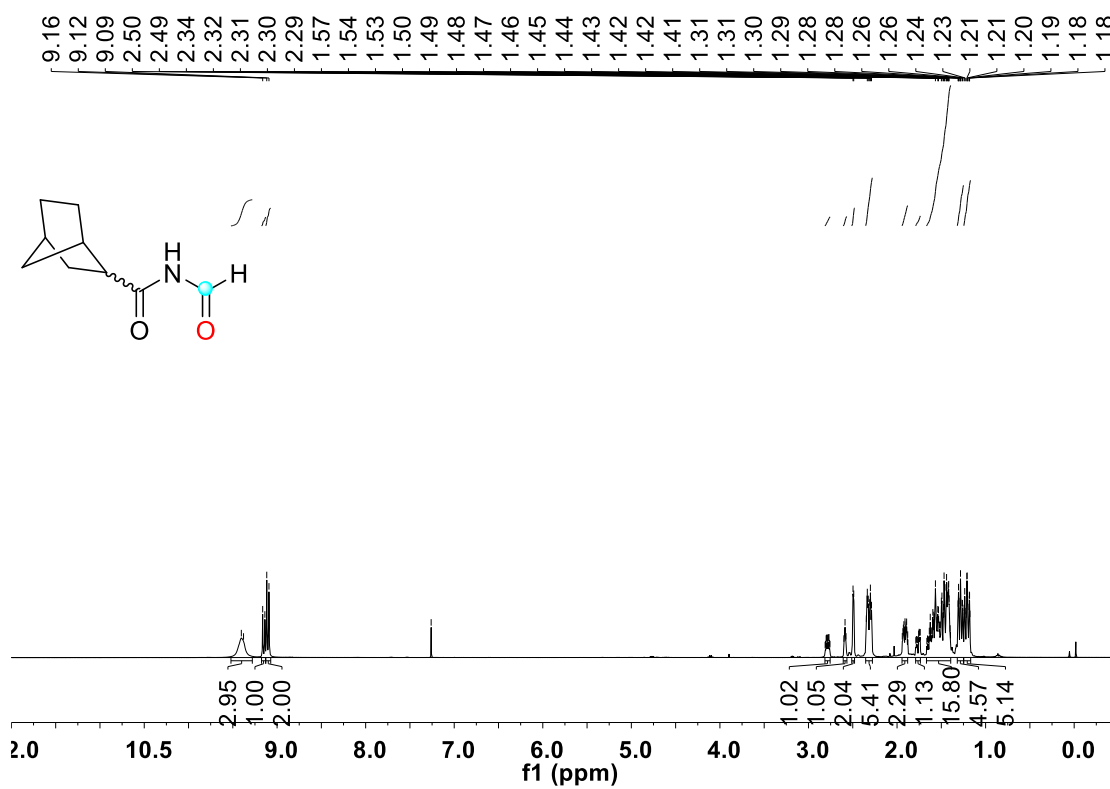

<sup>13</sup>C NMR (126 MHz, CDCl<sub>3</sub>) spectra for compound **2ae**

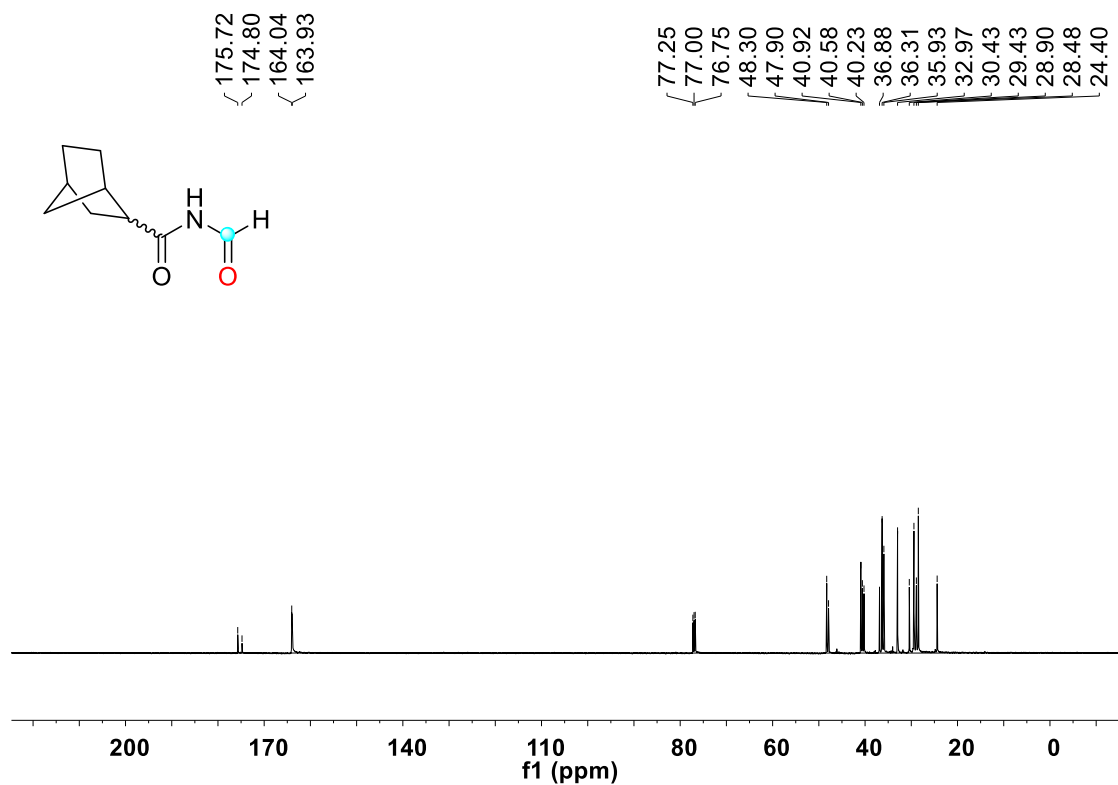

<sup>1</sup>H NMR (400 MHz, CDCl<sub>3</sub>) spectra for compound **2af**

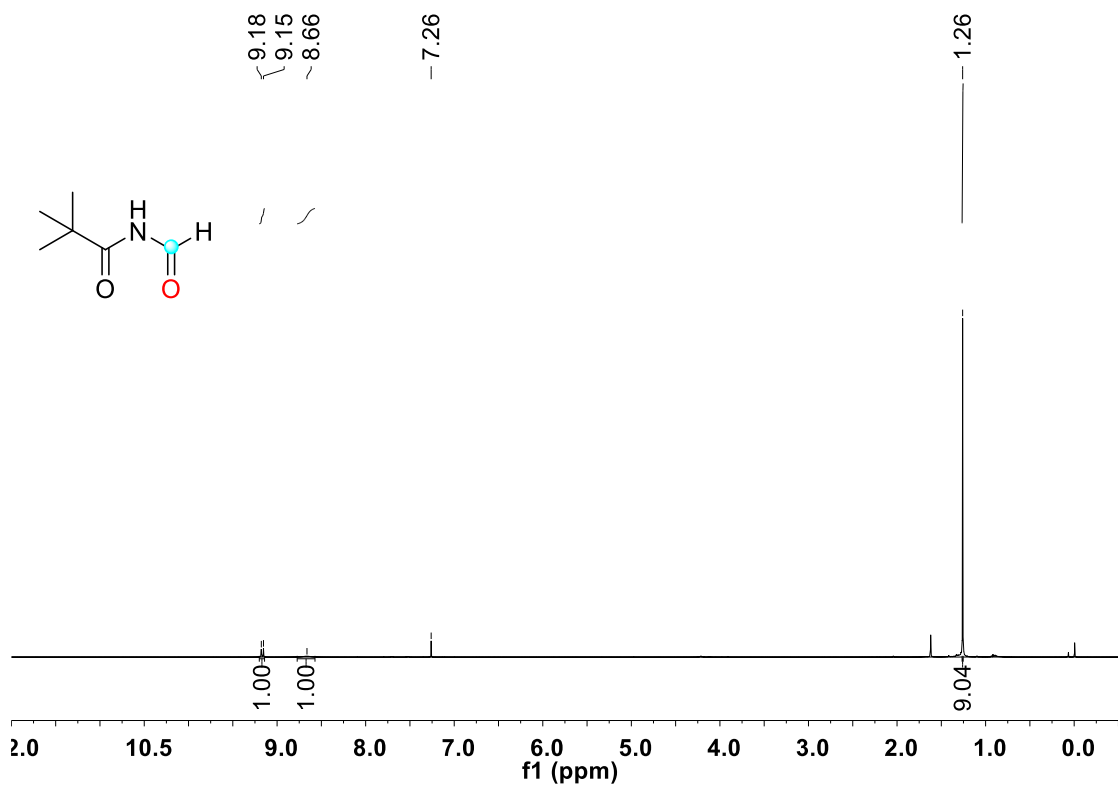

<sup>13</sup>C NMR (126 MHz, CDCl<sub>3</sub>) spectra for compound **2af**

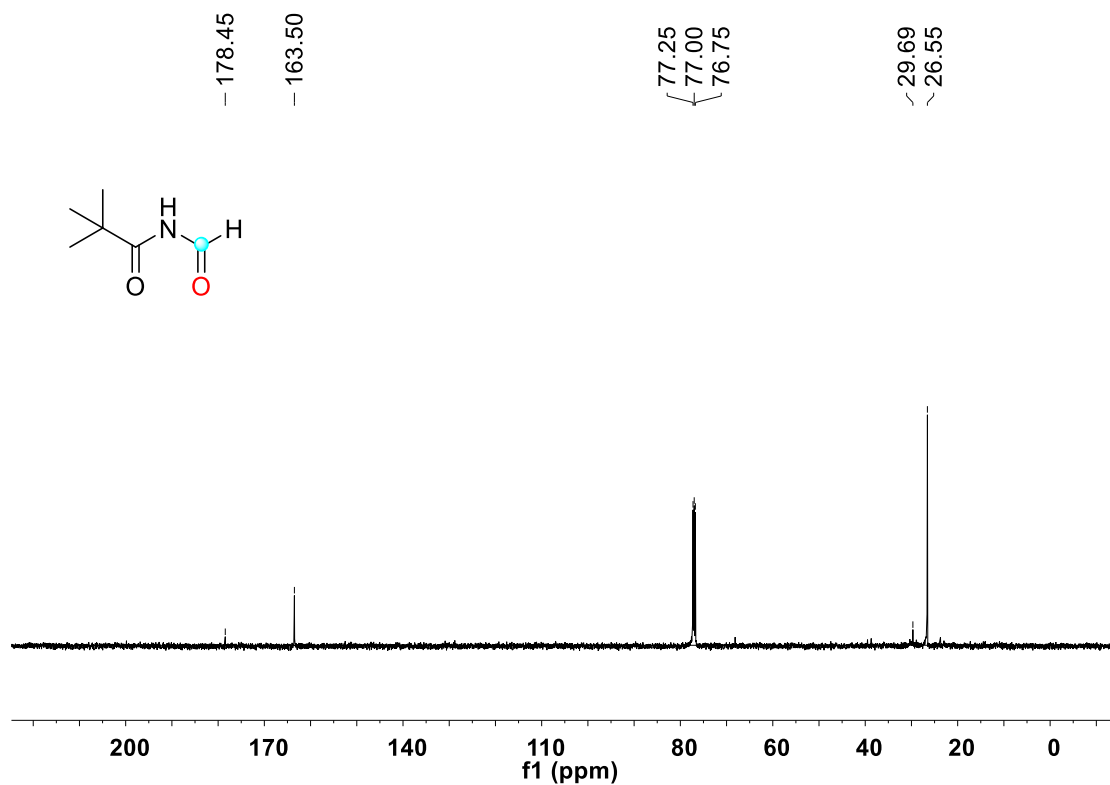

<sup>1</sup>H NMR (400 MHz, CDCl<sub>3</sub>) spectra for compound **2ag**

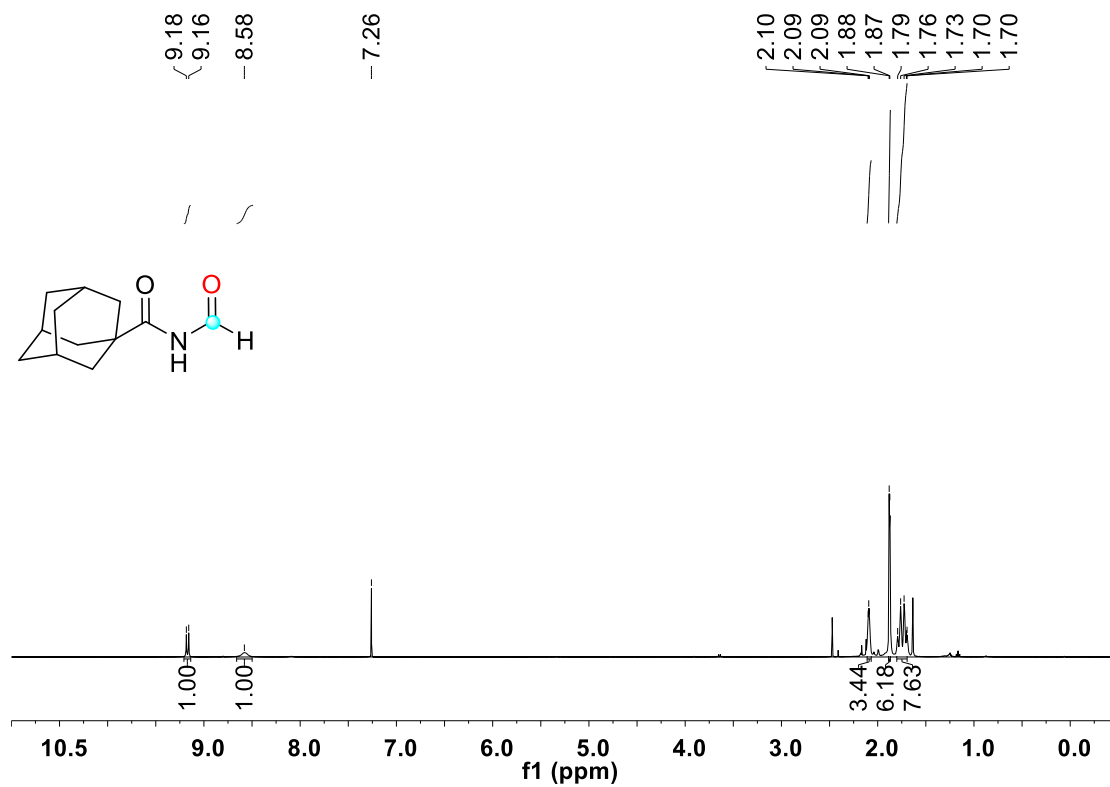

<sup>13</sup>C NMR (126 MHz, CDCl<sub>3</sub>) spectra for compound **2ag**

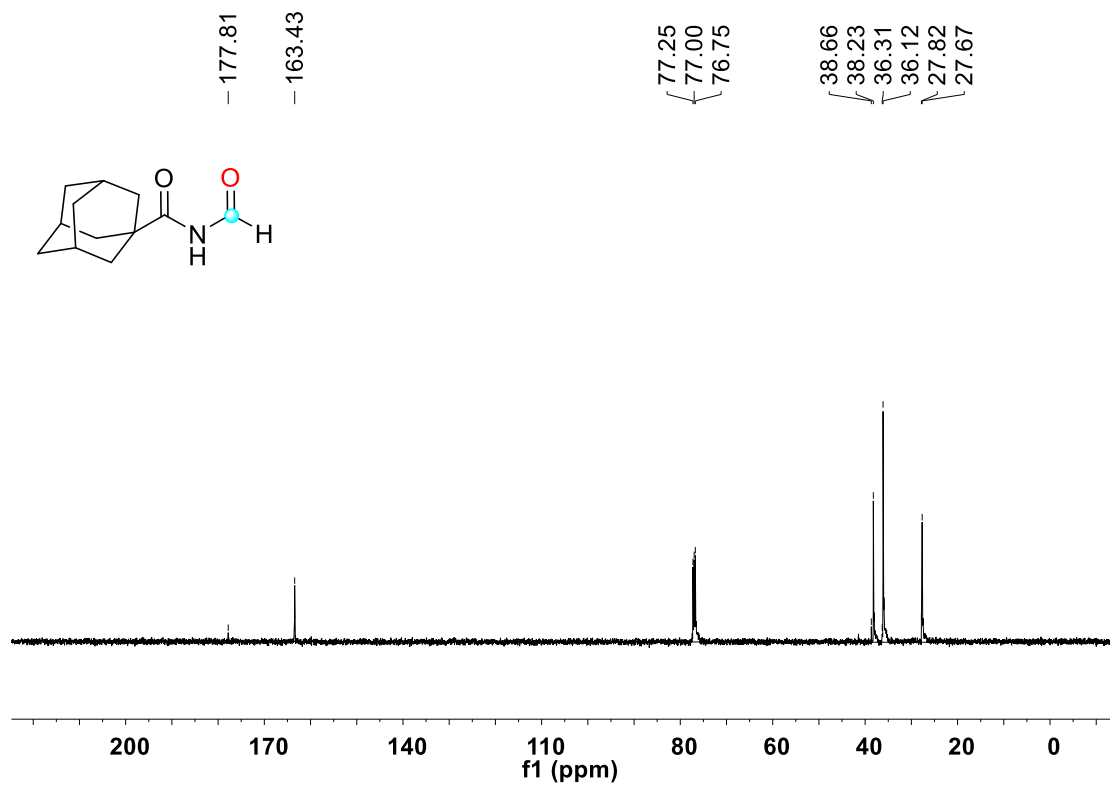

<sup>1</sup>H NMR (400 MHz, CDCl<sub>3</sub>) spectra for compound **2ah**

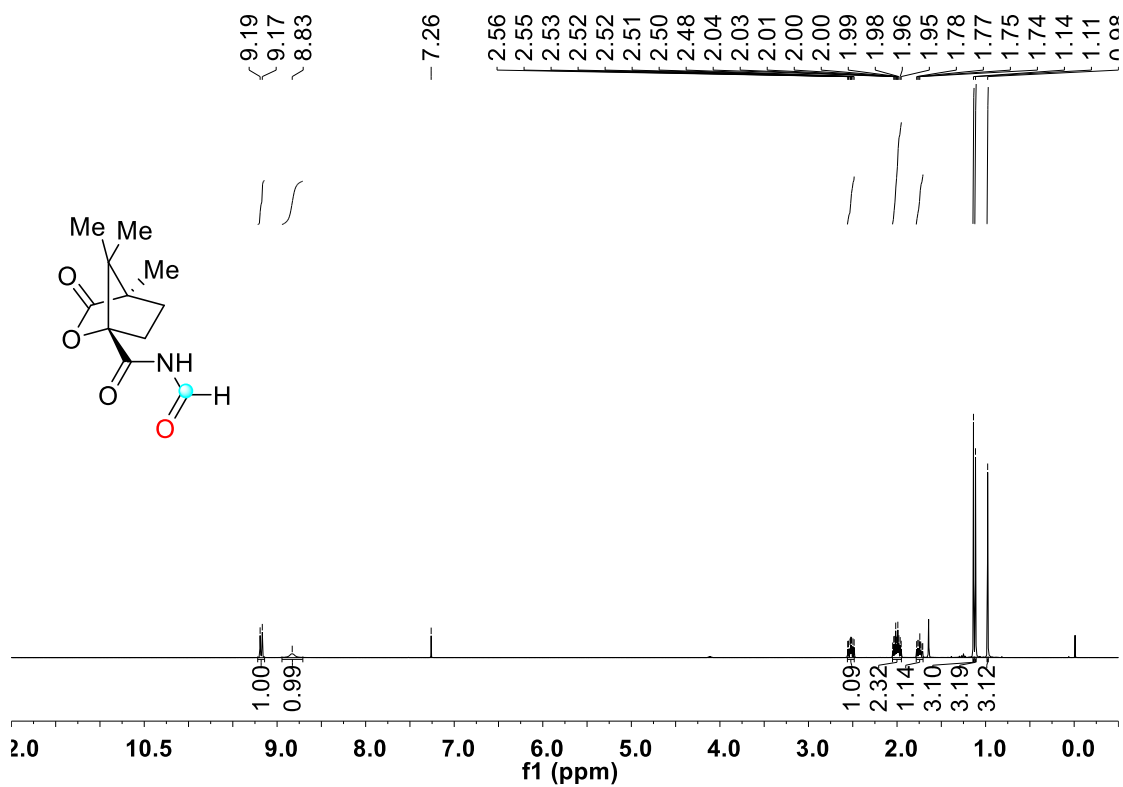

<sup>13</sup>C NMR (126 MHz, CDCl<sub>3</sub>) spectra for compound **2ah**

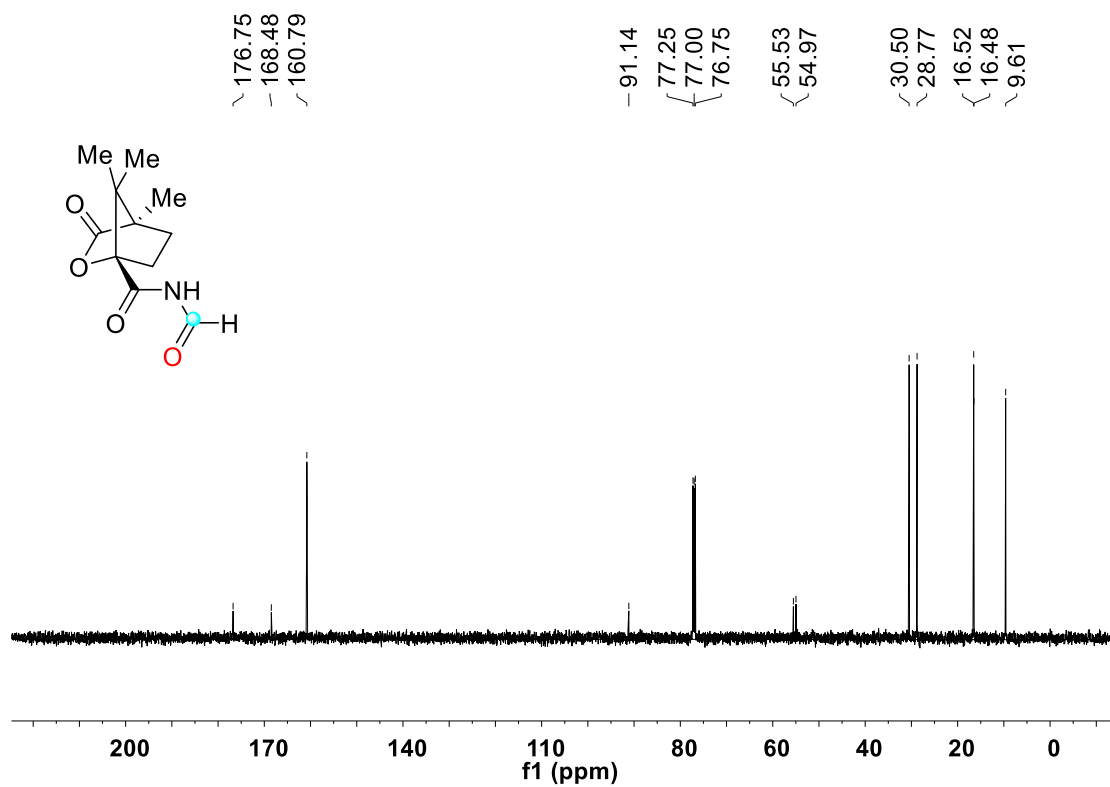

<sup>1</sup>H NMR (400 MHz, CDCl<sub>3</sub>) spectra for compound **2ai**

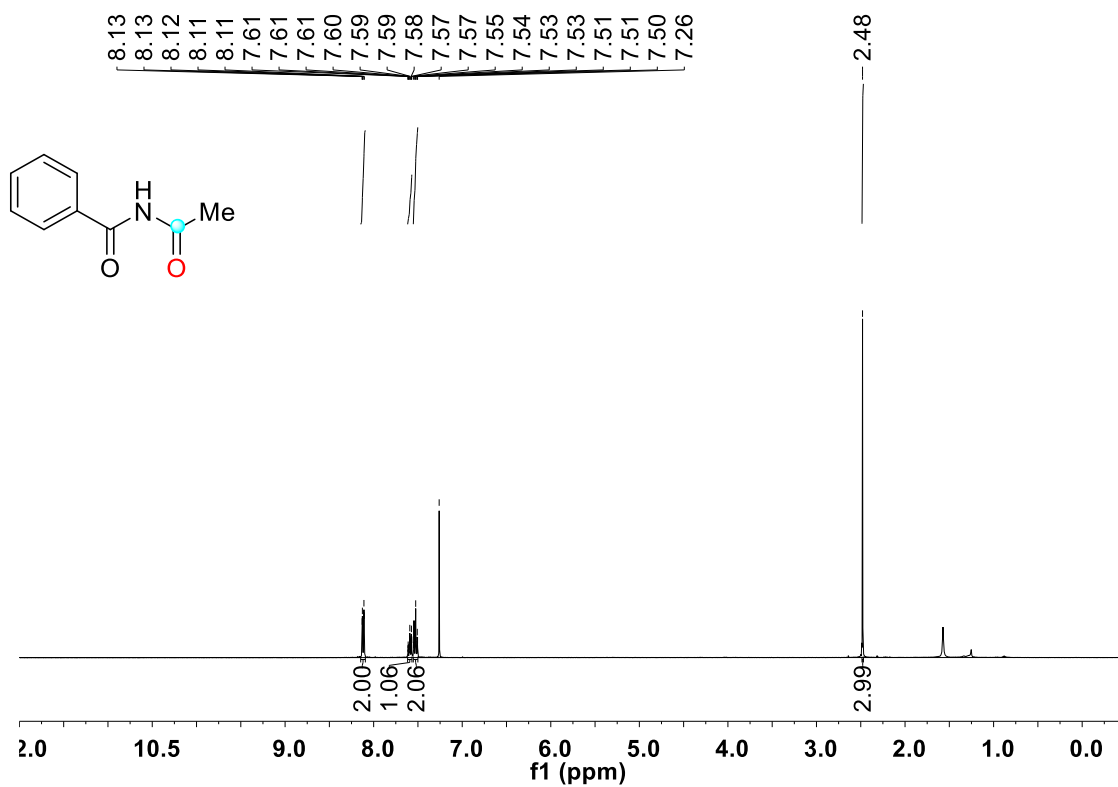

<sup>13</sup>C NMR (126 MHz, CDCl<sub>3</sub>) spectra for compound **2ai**

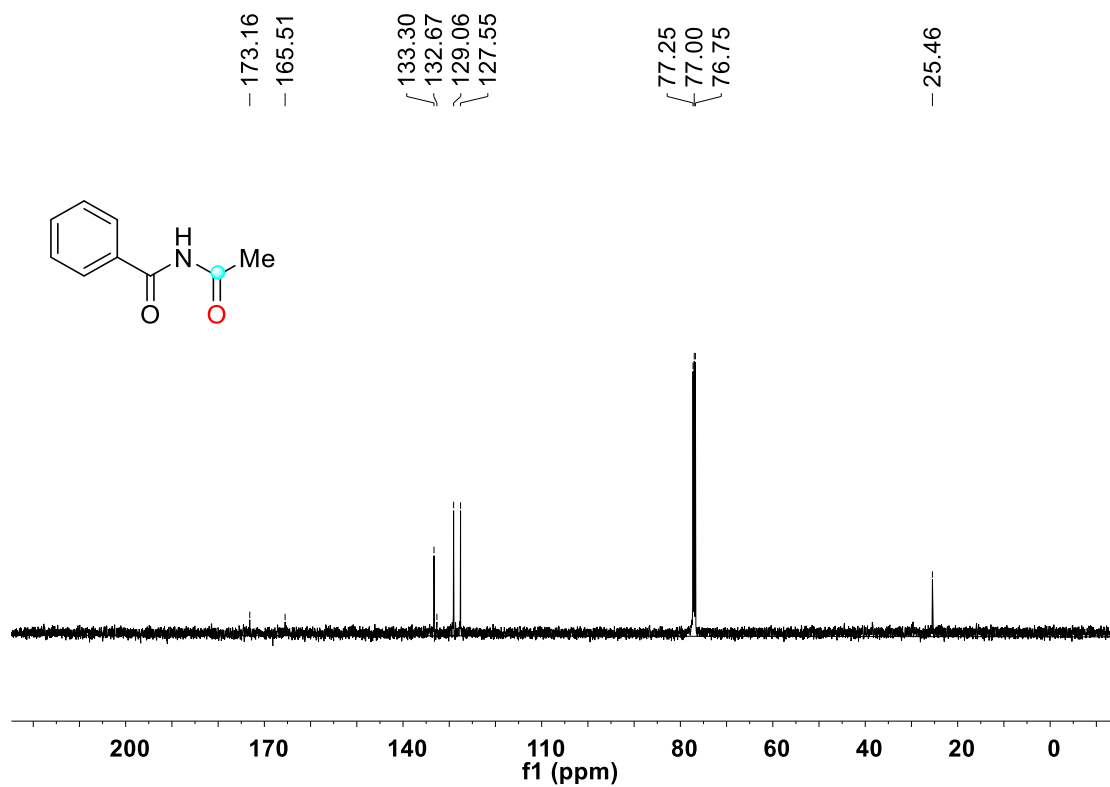

<sup>1</sup>H NMR (400 MHz, CDCl<sub>3</sub>) spectra for compound **2aj**

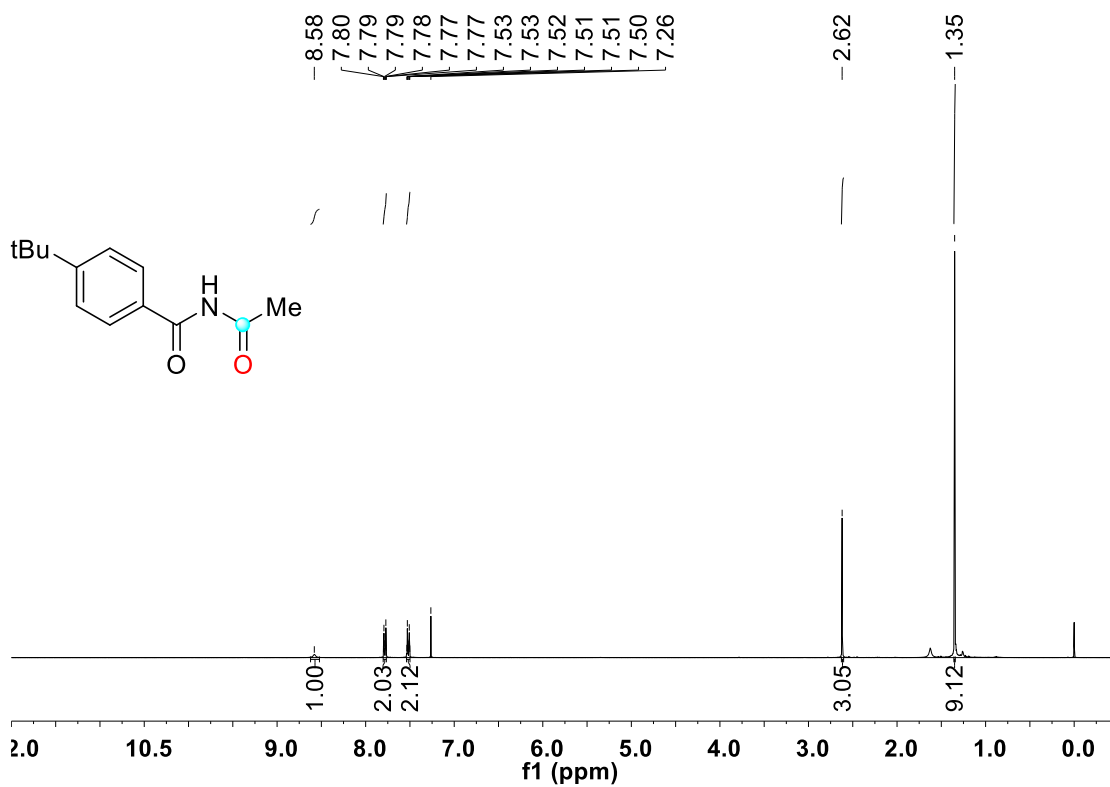

<sup>13</sup>C NMR (126 MHz, CDCl<sub>3</sub>) spectra for compound **2aj**

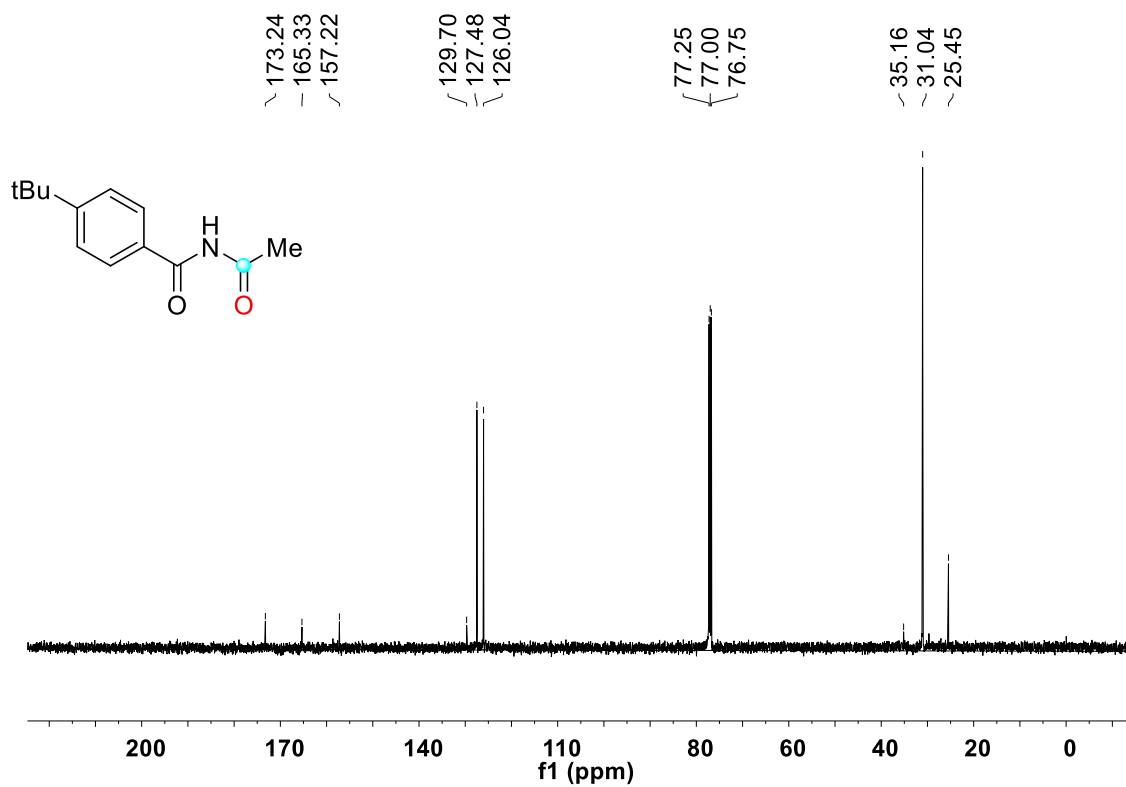

<sup>1</sup>H NMR (400 MHz, CDCl<sub>3</sub>) spectra for compound **2ak**

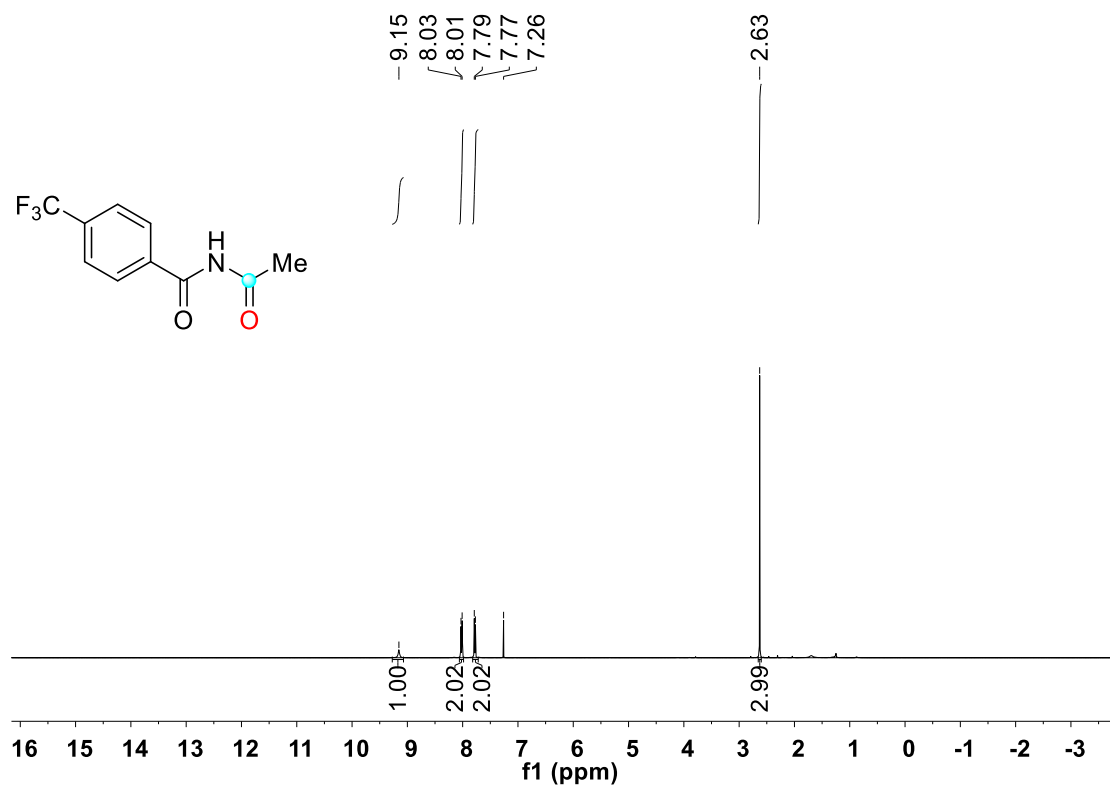

$^{19}\text{F}$  NMR (377 MHz,  $\text{CDCl}_3$ ) spectra for compound **2ak**

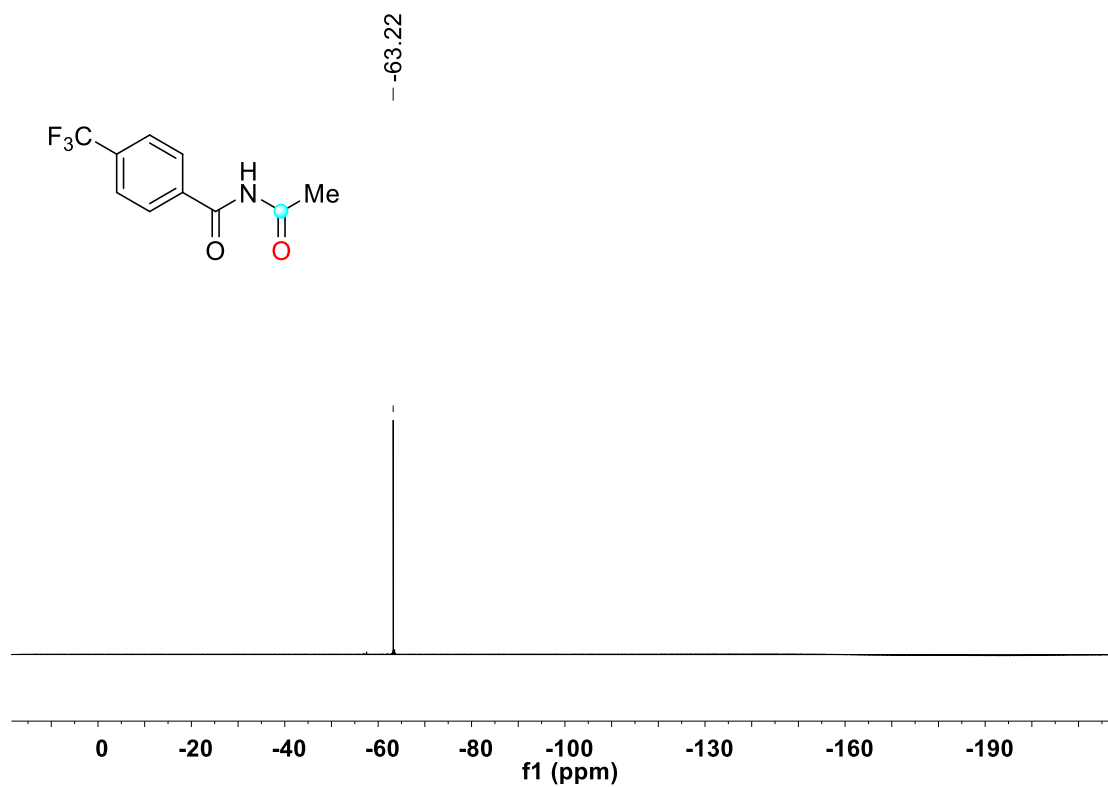

$^1\text{H}$  NMR (400 MHz,  $\text{CDCl}_3$ ) spectra for compound **2al**

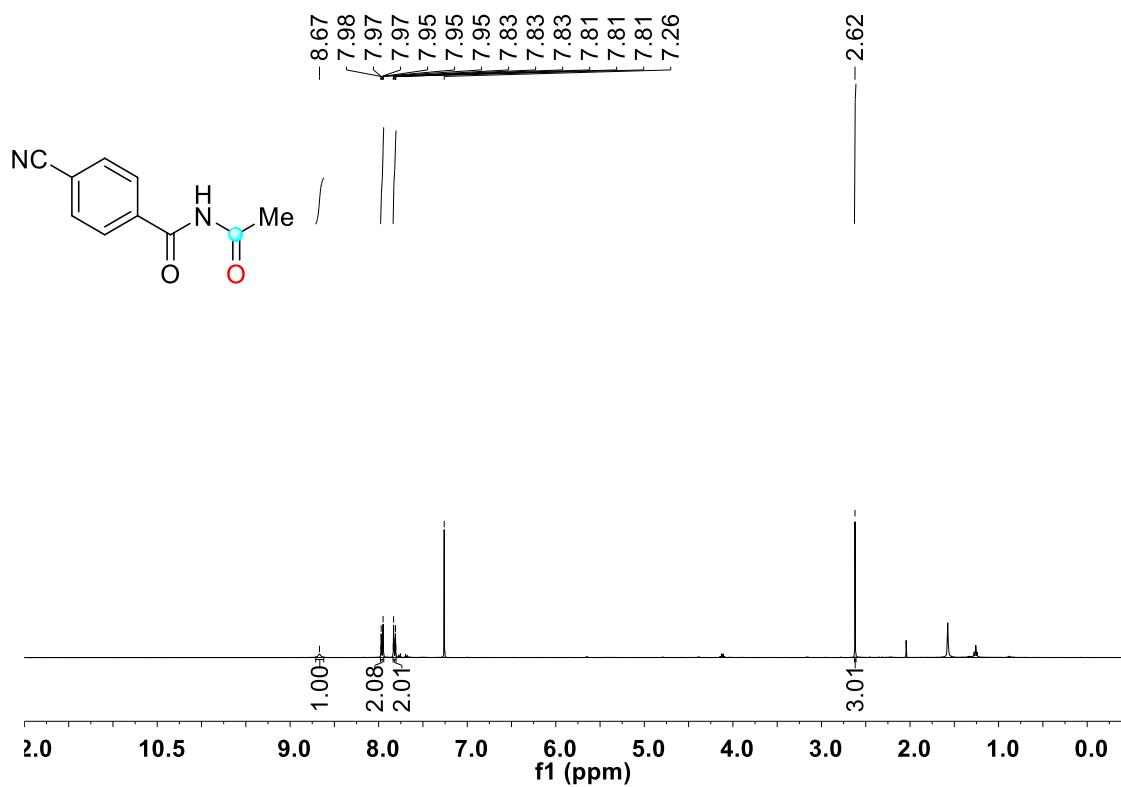



<sup>13</sup>C NMR (126 MHz, CDCl<sub>3</sub>) spectra for compound **2al**

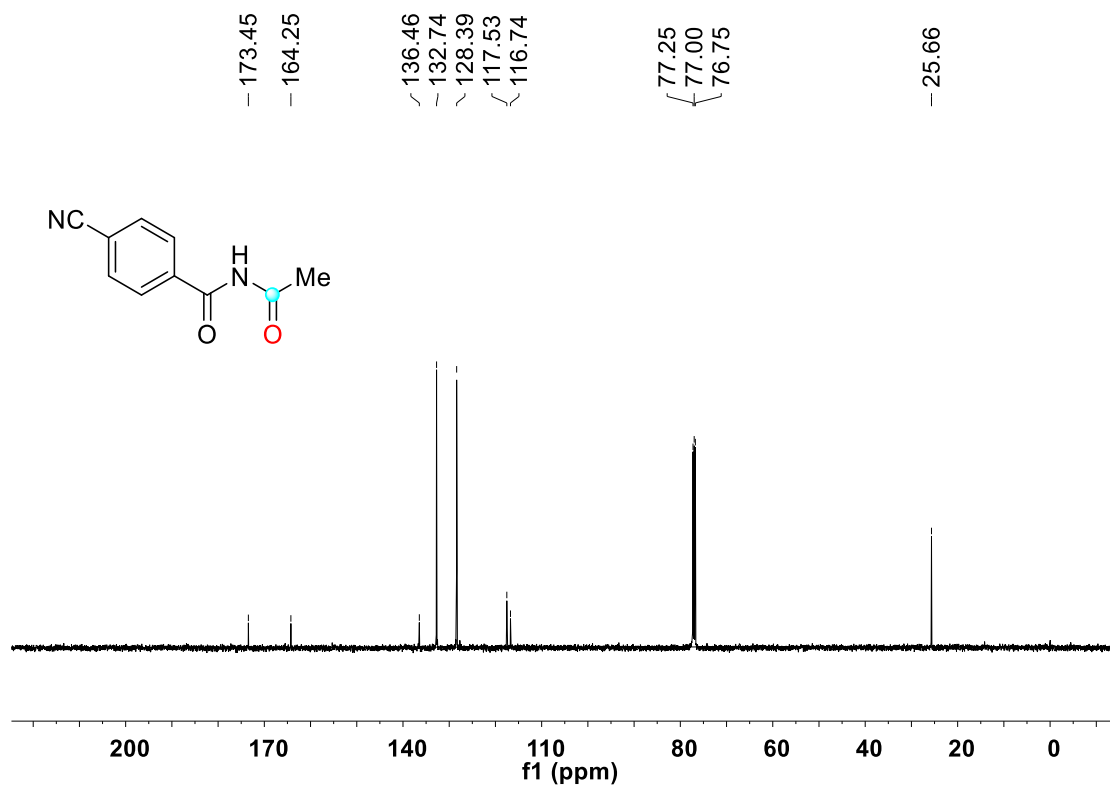

<sup>1</sup>H NMR (400 MHz, CDCl<sub>3</sub>) spectra for compound **2am**

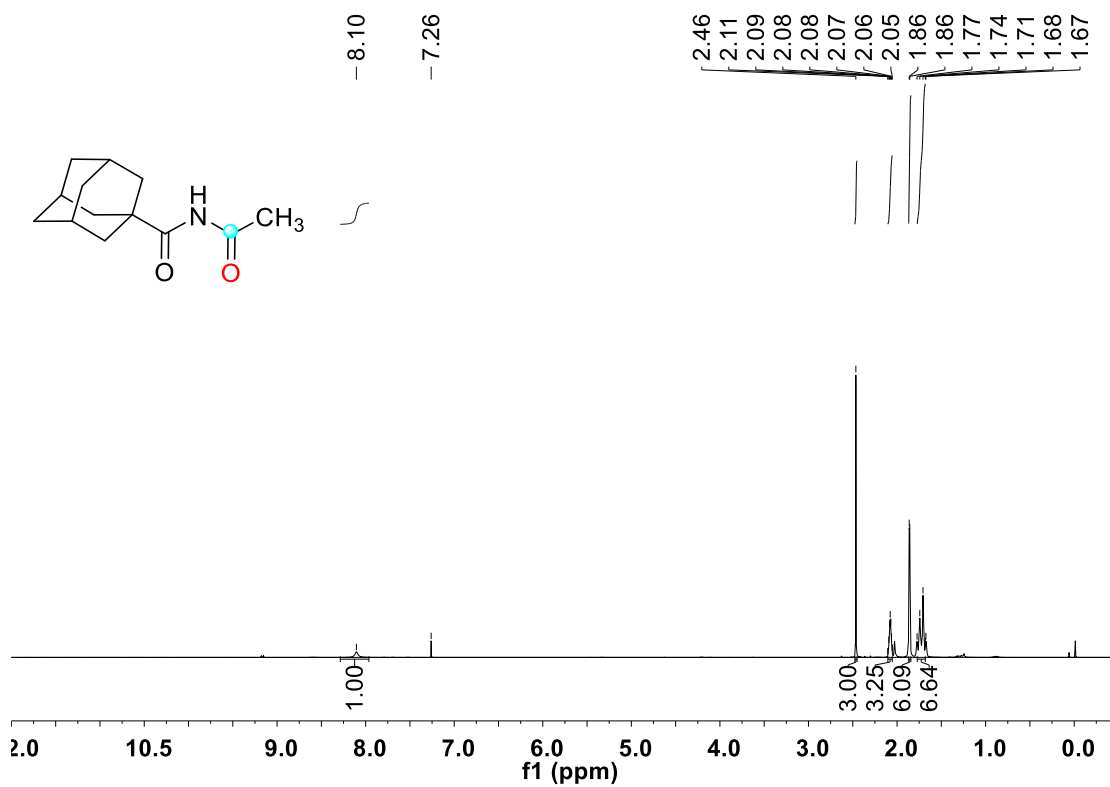

<sup>13</sup>C NMR (126 MHz, CDCl<sub>3</sub>) spectra for compound **2am**

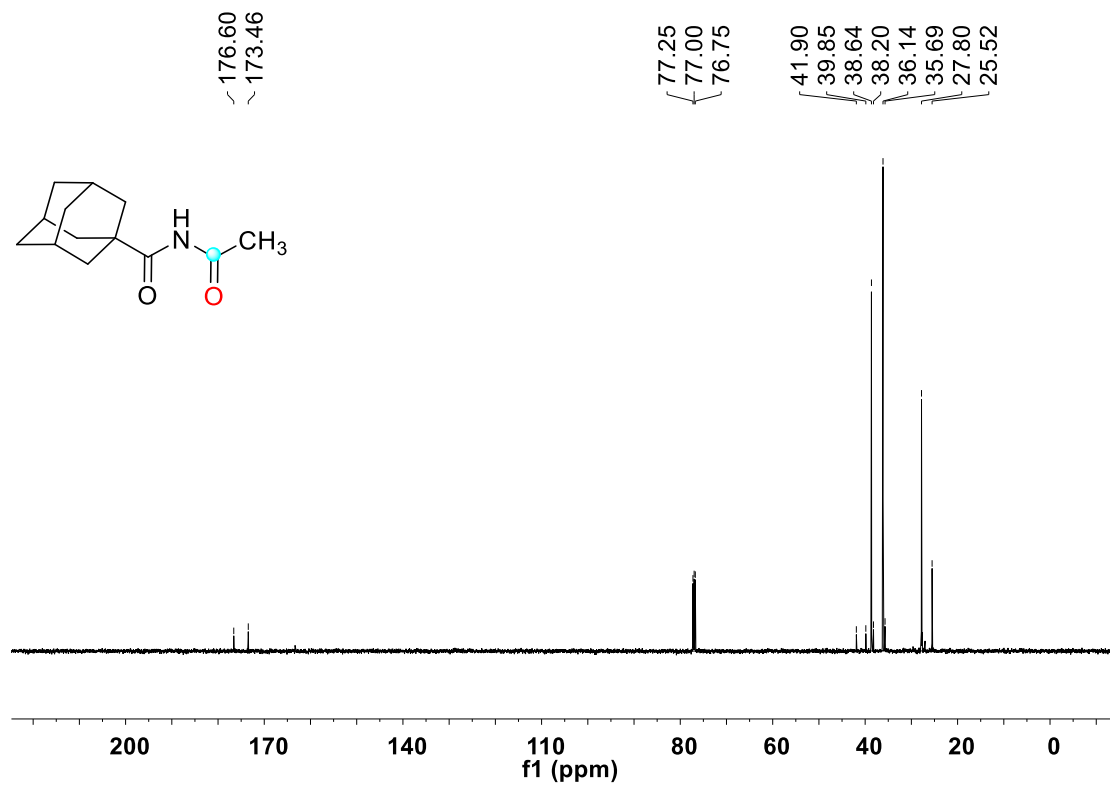

<sup>1</sup>H NMR (400 MHz, CDCl<sub>3</sub>) spectra for compound **2an**

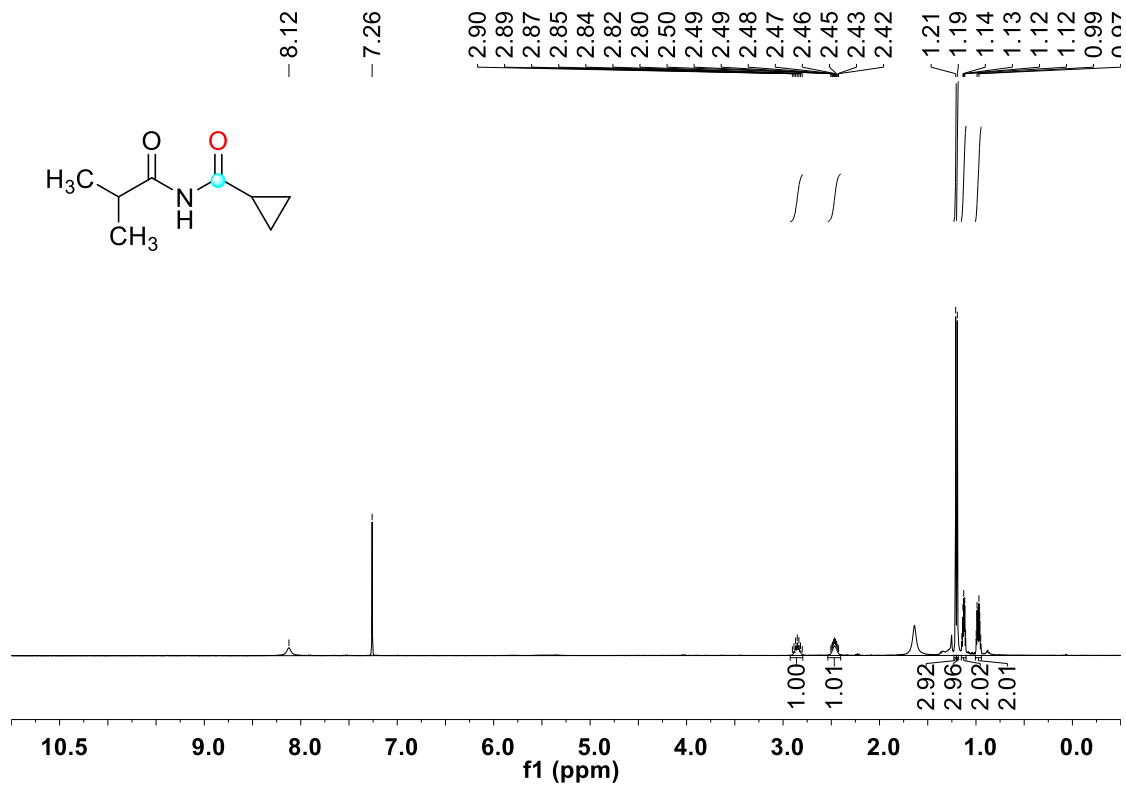

$^{13}\text{C}$  NMR (126 MHz,  $\text{CDCl}_3$ ) spectra for compound **2an**

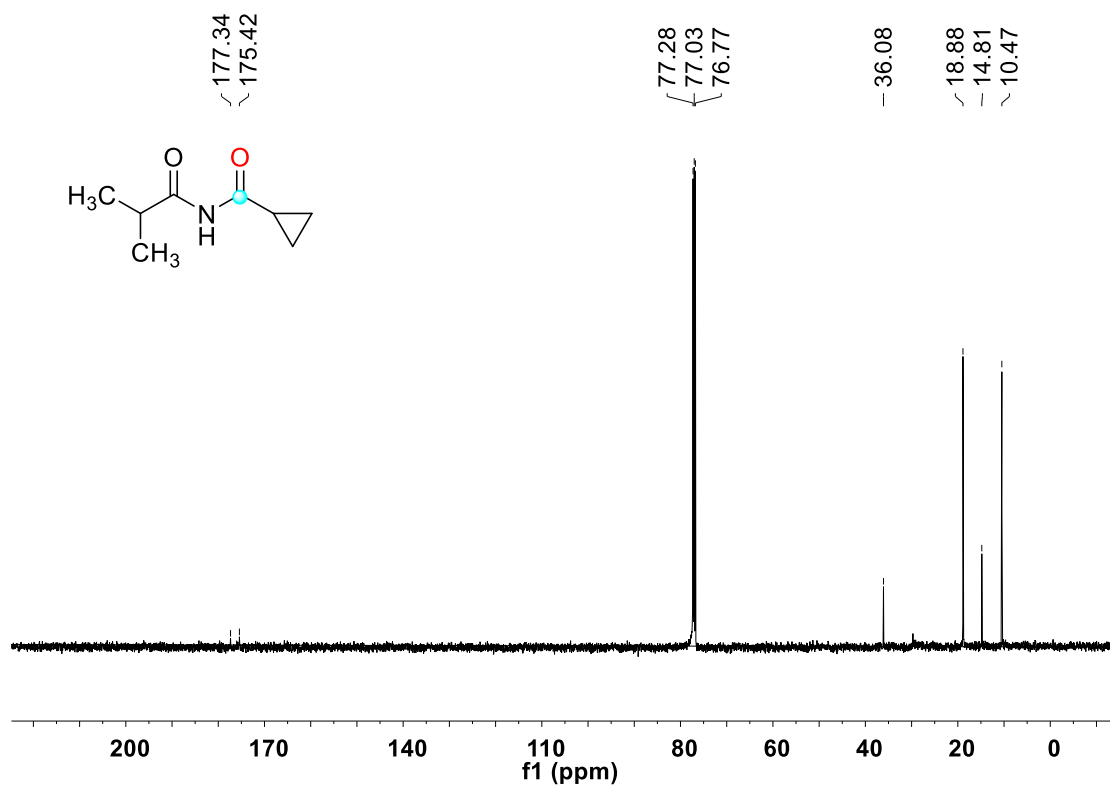

Supplement: d3gc04010k1.pdf [file d3gc04010k1.pdf]
